# Supplementary material for: The mouse KLF1 Nan variant impairs nuclear condensation and erythroid maturation
Source: PLoS One. 2019 Mar 28;14(3):e0208659. doi: 10.1371/journal.pone.0208659 (PMC6438607; doi:10.1371/journal.pone.0208659)
Supplement: S1 Table — (XLSX) [file pone.0208659.s002.xlsx]

## Sheet: DE RNA-Seq_Nan_vs_WT
id	baseMean	log2FoldChange	lfcSE	stat	pvalue	padj	symbol	chromosome_name	strand	gene_biotype	start_position	end_position	description
ENSG00000213931	7003.83	0.814654	0.236458	3.44524	0.000570552	0.00329522	HBE1	PAC8	-1	protein_coding	5289582	5526847	hemoglobin, epsilon 1 [Source:HGNC Symbol;Acc:4830]
ENSG00000213934	2360.73	0.588389	0.169797	3.46526	0.000529722	0.00309247	HBG1	PAC8	-1	protein_coding	5269313	5271122	hemoglobin, gamma A [Source:HGNC Symbol;Acc:4831]
ENSG00000223609	3643.29	1.80553	0.138344	13.051	6.26883e-39	5.27257e-37	HBD	PAC8	-1	protein_coding	5253908	5256600	hemoglobin, delta [Source:HGNC Symbol;Acc:4829]
ENSG00000229988	40.2581	1.0903	0.205941	5.29424	1.19515e-07	1.30944e-06	HBBP1	PAC8	-1	pseudogene	5263184	5264767	hemoglobin, beta pseudogene 1 [Source:HGNC Symbol;Acc:4828]
ENSG00000260629	83.3204	0.774415	0.183014	4.23145	2.32192e-05	0.000182301		PAC8	-1	sense_overlapping	5265784	5266777
ENSMUSG00000000037	51.9335	-1.05488	0.170703	-6.1796	6.4264e-10	9.04461e-09	Scml2	X	1	protein_coding	161117193	161258213	sex comb on midleg-like 2 (Drosophila) [Source:MGI Symbol;Acc:MGI:1340042]
ENSMUSG00000000253	4031.71	-0.727792	0.0838483	-8.67987	3.96211e-18	1.14746e-16	Gmpr	13	1	protein_coding	45507444	45546382	guanosine monophosphate reductase [Source:MGI Symbol;Acc:MGI:1913605]
ENSMUSG00000000325	918.28	2.28891	0.0793085	28.8609	3.70022e-183	3.46489e-180	Arvcf	16	1	protein_coding	18348182	18407076	armadillo repeat gene deleted in velo-cardio-facial syndrome [Source:MGI Symbol;Acc:MGI:109620]
ENSMUSG00000000374	4089.47	1.53079	0.0627012	24.414	1.21355e-131	7.1023e-129	Trappc10	10	-1	protein_coding	78186725	78244642	trafficking protein particle complex 10 [Source:MGI Symbol;Acc:MGI:1336209]
ENSMUSG00000000686	27.3624	0.730827	0.21029	3.47534	0.000510211	0.00298974	Abhd15	11	1	protein_coding	77515121	77538607	abhydrolase domain containing 15 [Source:MGI Symbol;Acc:MGI:1914727]
ENSMUSG00000000739	66.5985	3.22953	0.238074	13.5653	6.4338e-42	6.31952e-40	Sult5a1	8	-1	protein_coding	123142847	123158315	sulfotransferase family 5A, member 1 [Source:MGI Symbol;Acc:MGI:1931463]
ENSMUSG00000000861	1500.61	-0.837148	0.0656908	-12.7438	3.37663e-37	2.71018e-35	Bcl11a	11	1	protein_coding	24078056	24174123	B cell CLL/lymphoma 11A (zinc finger protein) [Source:MGI Symbol;Acc:MGI:106190]
ENSMUSG00000001123	1234.73	0.652998	0.0897601	7.27493	3.466e-13	6.68728e-12	Lgals9	11	-1	protein_coding	78962974	78984946	lectin, galactose binding, soluble 9 [Source:MGI Symbol;Acc:MGI:109496]
ENSMUSG00000001348	1774.57	-1.66028	0.189589	-8.75724	2.00089e-18	5.96699e-17	Acp5	9	-1	protein_coding	22126731	22135746	acid phosphatase 5, tartrate resistant [Source:MGI Symbol;Acc:MGI:87883]
ENSMUSG00000001441	1469.6	0.62479	0.04167	14.9938	8.06606e-51	1.09996e-48	Npepps	11	-1	protein_coding	97205842	97280638	aminopeptidase puromycin sensitive [Source:MGI Symbol;Acc:MGI:1101358]
ENSMUSG00000001918	4321.76	-0.657908	0.0813299	-8.08937	5.99742e-16	1.48309e-14	Slc1a5	7	1	protein_coding	16781346	16798274	solute carrier family 1 (neutral amino acid transporter), member 5 [Source:MGI Symbol;Acc:MGI:105305]
ENSMUSG00000002020	53.8352	1.34767	0.158452	8.50524	1.81228e-17	5.0307e-16	Ltbp2	12	-1	protein_coding	84783212	84876532	latent transforming growth factor beta binding protein 2 [Source:MGI Symbol;Acc:MGI:99502]
ENSMUSG00000002083	127.171	0.638486	0.151529	4.21363	2.513e-05	0.000196425	Bbc3	7	1	protein_coding	16309616	16318205	BCL2 binding component 3 [Source:MGI Symbol;Acc:MGI:2181667]
ENSMUSG00000002190	13.7001	-1.92426	0.382085	-5.03622	4.74823e-07	4.84692e-06	Clgn	8	1	protein_coding	83389867	83428552	calmegin [Source:MGI Symbol;Acc:MGI:107472]
ENSMUSG00000002249	299.436	2.04841	0.09619	21.2955	1.24993e-100	4.87682e-98	Tead3	17	-1	protein_coding	28331671	28350805	TEA domain family member 3 [Source:MGI Symbol;Acc:MGI:109241]
ENSMUSG00000002409	195.983	1.20848	0.0925284	13.0606	5.52616e-39	4.70427e-37	Dyrk1b	7	1	protein_coding	28179469	28187294	dual-specificity tyrosine-(Y)-phosphorylation regulated kinase 1b [Source:MGI Symbol;Acc:MGI:1330302]
ENSMUSG00000002808	278.102	-1.14369	0.213009	-5.36924	7.9071e-08	8.87795e-07	Epdr1	13	-1	protein_coding	19591709	19619830	ependymin related protein 1 (zebrafish) [Source:MGI Symbol;Acc:MGI:2145369]
ENSMUSG00000002910	368.097	-1.59716	0.130834	-12.2076	2.83242e-34	1.96951e-32	Arrdc2	8	-1	protein_coding	70835155	70839720	arrestin domain containing 2 [Source:MGI Symbol;Acc:MGI:1918057]
ENSMUSG00000003070	31.0546	1.02847	0.208343	4.93643	7.95649e-07	7.91479e-06	Efna2	10	1	protein_coding	80179482	80190010	ephrin A2 [Source:MGI Symbol;Acc:MGI:102707]
ENSMUSG00000003153	2146.92	0.820337	0.0978364	8.38479	5.08171e-17	1.37001e-15	Slc2a3	6	-1	protein_coding	122727809	122801640	solute carrier family 2 (facilitated glucose transporter), member 3 [Source:MGI Symbol;Acc:MGI:95757]
ENSMUSG00000003341	31.9715	4.41528	0.357392	12.3542	4.62493e-35	3.33138e-33	Atp8b3	10	-1	protein_coding	80519585	80539124	ATPase, class I, type 8B, member 3 [Source:MGI Symbol;Acc:MGI:1914581]
ENSMUSG00000003363	874.472	-0.618874	0.103406	-5.98488	2.16548e-09	2.90233e-08	Pld3	7	-1	protein_coding	27532000	27553218	phospholipase D family, member 3 [Source:MGI Symbol;Acc:MGI:1333782]
ENSMUSG00000003469	60.1499	-1.45453	0.184798	-7.87092	3.52042e-15	8.21392e-14	Phyhip	14	1	protein_coding	70457476	70468832	phytanoyl-CoA hydroxylase interacting protein [Source:MGI Symbol;Acc:MGI:1860417]
ENSMUSG00000003575	1099.98	2.06171	0.0696747	29.5905	1.97994e-192	2.5282e-189	Crtc1	8	-1	protein_coding	70382355	70439579	CREB regulated transcription coactivator 1 [Source:MGI Symbol;Acc:MGI:2142523]
ENSMUSG00000003746	1143.39	-0.665364	0.0745386	-8.92643	4.39957e-19	1.37938e-17	Man1a	10	-1	protein_coding	53904788	54075796	mannosidase 1, alpha [Source:MGI Symbol;Acc:MGI:104677]
ENSMUSG00000003813	2876.71	-1.13184	0.157933	-7.16657	7.69013e-13	1.44213e-11	Rad23a	8	-1	protein_coding	84834019	84840665	RAD23a homolog (S. cerevisiae) [Source:MGI Symbol;Acc:MGI:105126]
ENSMUSG00000004040	2433.56	1.25666	0.0754988	16.6447	3.30417e-62	6.18805e-60	Stat3	11	-1	protein_coding	100885098	100939540	signal transducer and activator of transcription 3 [Source:MGI Symbol;Acc:MGI:103038]
ENSMUSG00000004187	240.041	3.73825	0.154977	24.1213	1.49274e-128	8.06424e-126	Kifc2	15	1	protein_coding	76660641	76668196	kinesin family member C2 [Source:MGI Symbol;Acc:MGI:109187]
ENSMUSG00000004207	14581.3	1.93838	0.0621625	31.1825	1.84065e-213	3.69339e-210	Psap	10	1	protein_coding	60277627	60302597	prosaposin [Source:MGI Symbol;Acc:MGI:97783]
ENSMUSG00000004462	601.931	-1.11044	0.101542	-10.9358	7.7725e-28	4.05846e-26	Tbccd1	16	-1	protein_coding	22813215	22857569	TBCC domain containing 1 [Source:MGI Symbol;Acc:MGI:1917823]
ENSMUSG00000004552	925.7	2.30684	0.118151	19.5246	6.79103e-85	1.94667e-82	Ctse	1	1	protein_coding	131638306	131675503	cathepsin E [Source:MGI Symbol;Acc:MGI:107361]
ENSMUSG00000004558	369.083	0.756328	0.0907327	8.33577	7.69923e-17	2.04817e-15	Ndrg2	14	-1	protein_coding	51905271	51913488	N-myc downstream regulated gene 2 [Source:MGI Symbol;Acc:MGI:1352498]
ENSMUSG00000004562	865.087	0.706557	0.077035	9.17189	4.64786e-20	1.53971e-18	Arhgef40	14	1	protein_coding	51984719	52006251	Rho guanine nucleotide exchange factor (GEF) 40 [Source:MGI Symbol;Acc:MGI:2685515]
ENSMUSG00000004655	4457.38	2.05734	0.0802147	25.6479	4.46791e-145	2.98839e-142	Aqp1	6	1	protein_coding	55336432	55348555	aquaporin 1 [Source:MGI Symbol;Acc:MGI:103201]
ENSMUSG00000004677	2049.41	0.670239	0.0530648	12.6306	1.43256e-36	1.1117e-34	Myo9b	8	1	protein_coding	71272714	71360712	myosin IXb [Source:MGI Symbol;Acc:MGI:106624]
ENSMUSG00000004730	364.327	-0.790672	0.227002	-3.48311	0.000495622	0.00291765	Emr1	17	1	protein_coding	57358686	57483529	EGF-like module containing, mucin-like, hormone receptor-like sequence 1 [Source:MGI Symbol;Acc:MGI:106912]
ENSMUSG00000005338	196.546	0.789931	0.122394	6.454	1.08934e-10	1.66677e-09	Cadm3	1	-1	protein_coding	173334254	173367695	cell adhesion molecule 3 [Source:MGI Symbol;Acc:MGI:2137858]
ENSMUSG00000005465	50.4288	0.770906	0.199238	3.86928	0.000109157	0.000750481	Il27ra	8	-1	protein_coding	84030287	84042575	interleukin 27 receptor, alpha [Source:MGI Symbol;Acc:MGI:1355318]
ENSMUSG00000005580	236.596	1.06197	0.147826	7.18393	6.77376e-13	1.27539e-11	Adcy9	16	-1	protein_coding	4287529	4420498	adenylate cyclase 9 [Source:MGI Symbol;Acc:MGI:108450]
ENSMUSG00000005615	2051.7	-0.709097	0.0510731	-13.884	7.92218e-44	8.24259e-42	Pcyt1a	16	1	protein_coding	32430921	32475070	phosphate cytidylyltransferase 1, choline, alpha isoform [Source:MGI Symbol;Acc:MGI:88557]
ENSMUSG00000005686	1065.09	-1.4061	0.152176	-9.23992	2.46686e-20	8.32923e-19	Ampd3	7	1	protein_coding	110768206	110812405	adenosine monophosphate deaminase 3 [Source:MGI Symbol;Acc:MGI:1096344]
ENSMUSG00000005774	422.941	2.94935	0.0997663	29.5626	4.5187e-192	5.28914e-189	Rfx5	3	1	protein_coding	94954075	94961561	regulatory factor X, 5 (influences HLA class II expression) [Source:MGI Symbol;Acc:MGI:1858421]
ENSMUSG00000005968	392.605	1.54547	0.121875	12.6808	7.55238e-37	5.99326e-35	Tuft1	3	-1	protein_coding	94612757	94658872	tuftelin 1 [Source:MGI Symbol;Acc:MGI:109572]
ENSMUSG00000006095	581.338	0.730255	0.0689789	10.5866	3.43703e-26	1.62547e-24	Tbcb	7	-1	protein_coding	30224131	30232272	tubulin folding cofactor B [Source:MGI Symbol;Acc:MGI:1913661]
ENSMUSG00000006262	2211.61	0.798974	0.0656929	12.1623	4.93744e-34	3.36657e-32	Mob1b	5	1	protein_coding	88720855	88762058	MOB kinase activator 1B [Source:MGI Symbol;Acc:MGI:1915723]
ENSMUSG00000006362	1140.27	0.90099	0.062096	14.5096	1.05296e-47	1.2641e-45	Cbfa2t3	8	-1	protein_coding	122628739	122699109	core-binding factor, runt domain, alpha subunit 2, translocated to, 3 (human) [Source:MGI Symbol;Acc:MGI:1338013]
ENSMUSG00000006464	99.5826	-0.827249	0.110167	-7.50907	5.95484e-14	1.23914e-12	Bbs1	19	-1	protein_coding	4886898	4906627	Bardet-Biedl syndrome 1 (human) [Source:MGI Symbol;Acc:MGI:1277215]
ENSMUSG00000006586	319.465	-1.6312	0.222382	-7.33513	2.21511e-13	4.35152e-12	Runx1t1	4	1	protein_coding	13743436	13893649	runt-related transcription factor 1; translocated to, 1 (cyclin D-related) [Source:MGI Symbol;Acc:MGI:104793]
ENSMUSG00000006641	281.742	1.06988	0.0724497	14.7672	2.38495e-49	3.10177e-47	Slc5a6	5	-1	protein_coding	31036036	31048924	solute carrier family 5 (sodium-dependent vitamin transporter), member 6 [Source:MGI Symbol;Acc:MGI:2660847]
ENSMUSG00000007379	1596.29	1.05482	0.0740406	14.2465	4.71632e-46	5.21618e-44	Dennd2c	3	1	protein_coding	103102604	103169769	DENN/MADD domain containing 2C [Source:MGI Symbol;Acc:MGI:3036254]
ENSMUSG00000008090	493.774	0.702558	0.0756125	9.29156	1.52041e-20	5.18343e-19	Fgfrl1	5	1	protein_coding	108694229	108706950	fibroblast growth factor receptor-like 1 [Source:MGI Symbol;Acc:MGI:2150920]
ENSMUSG00000008318	502.246	-1.20948	0.100058	-12.0877	1.22623e-33	8.12435e-32	Relt	7	-1	protein_coding	100845848	100863446	RELT tumor necrosis factor receptor [Source:MGI Symbol;Acc:MGI:2443373]
ENSMUSG00000008843	1852.39	-1.09339	0.109887	-9.95011	2.51917e-23	1.04998e-21	Cldn13	5	-1	protein_coding	134914249	134915526	claudin 13 [Source:MGI Symbol;Acc:MGI:1913102]
ENSMUSG00000009545	14.737	1.30879	0.288426	4.53771	5.68681e-06	4.98919e-05	Kcnq1	7	1	protein_coding	143107254	143427042	potassium voltage-gated channel, subfamily Q, member 1 [Source:MGI Symbol;Acc:MGI:108083]
ENSMUSG00000010066	221.848	5.44338	0.392272	13.8765	8.78985e-44	9.07811e-42	Cacna2d2	9	1	protein_coding	107399612	107529346	calcium channel, voltage-dependent, alpha 2/delta subunit 2 [Source:MGI Symbol;Acc:MGI:1929813]
ENSMUSG00000011179	9629.28	-1.01224	0.0749225	-13.5105	1.35578e-41	1.32245e-39	Odc1	12	1	protein_coding	17544873	17551502	ornithine decarboxylase, structural 1 [Source:MGI Symbol;Acc:MGI:97402]
ENSMUSG00000011257	5847.36	-0.648304	0.0553416	-11.7146	1.07318e-31	6.58248e-30	Pabpc4	4	1	protein_coding	123262351	123298925	poly(A) binding protein, cytoplasmic 4 [Source:MGI Symbol;Acc:MGI:2385206]
ENSMUSG00000012428	28.2088	1.07603	0.31206	3.44816	0.000564427	0.00326744	Steap4	5	1	protein_coding	7960472	7982213	STEAP family member 4 [Source:MGI Symbol;Acc:MGI:1923560]
ENSMUSG00000014245	229.474	0.586233	0.0814101	7.20098	5.97794e-13	1.1301e-11	Pigl	11	1	protein_coding	62458460	62514417	phosphatidylinositol glycan anchor biosynthesis, class L [Source:MGI Symbol;Acc:MGI:2681271]
ENSMUSG00000014503	129.495	-0.673288	0.105735	-6.36773	1.91853e-10	2.83659e-09	Pkd2l2	18	1	protein_coding	34409423	34442789	polycystic kidney disease 2-like 2 [Source:MGI Symbol;Acc:MGI:1858231]
ENSMUSG00000014542	58.7873	-1.13094	0.285128	-3.96644	7.29543e-05	0.000522814	Clec4f	6	-1	protein_coding	83644542	83656187	C-type lectin domain family 4, member f [Source:MGI Symbol;Acc:MGI:1859834]
ENSMUSG00000014791	146.429	-1.02045	0.134932	-7.5627	3.94792e-14	8.36386e-13	Elmo3	8	1	protein_coding	105305601	105310623	engulfment and cell motility 3 [Source:MGI Symbol;Acc:MGI:2679007]
ENSMUSG00000014846	56.8822	3.00191	0.387858	7.73972	9.96388e-15	2.21094e-13	Tppp3	8	-1	protein_coding	105467493	105471526	tubulin polymerization-promoting protein family member 3 [Source:MGI Symbol;Acc:MGI:1915221]
ENSMUSG00000014859	4989.79	-1.09855	0.0944454	-11.6316	2.8457e-31	1.69367e-29	E2f4	8	1	protein_coding	105297663	105305369	E2F transcription factor 4 [Source:MGI Symbol;Acc:MGI:103012]
ENSMUSG00000015053	493.689	1.07522	0.0887085	12.1208	8.19782e-34	5.50941e-32	Gata2	6	1	protein_coding	88193891	88207030	GATA binding protein 2 [Source:MGI Symbol;Acc:MGI:95662]
ENSMUSG00000015143	2545.93	1.16254	0.0595104	19.5351	5.52496e-85	1.61674e-82	Actn1	12	-1	protein_coding	80167542	80260371	actinin, alpha 1 [Source:MGI Symbol;Acc:MGI:2137706]
ENSMUSG00000015149	1309.1	1.76902	0.0785204	22.5294	2.13721e-112	9.38104e-110	Sirt2	7	1	protein_coding	28766735	28788665	sirtuin 2 (silent mating type information regulation 2, homolog) 2 (S. cerevisiae) [Source:MGI Symbol;Acc:MGI:1927664]
ENSMUSG00000015217	1437.76	0.609667	0.0573621	10.6284	2.1987e-26	1.05044e-24	Hmgb3	X	1	protein_coding	71555918	71560676	high mobility group box 3 [Source:MGI Symbol;Acc:MGI:1098219]
ENSMUSG00000015766	55.6607	1.28187	0.159452	8.03918	9.04416e-16	2.217e-14	Eps8	6	-1	protein_coding	137477245	137654876	epidermal growth factor receptor pathway substrate 8 [Source:MGI Symbol;Acc:MGI:104684]
ENSMUSG00000015837	3044.22	0.597929	0.0490657	12.1863	3.67715e-34	2.53183e-32	Sqstm1	11	-1	protein_coding	50199366	50210827	sequestosome 1 [Source:MGI Symbol;Acc:MGI:107931]
ENSMUSG00000016200	173.448	-1.49468	0.157335	-9.50001	2.09874e-21	7.63703e-20	Syt14	1	-1	protein_coding	192897307	193035698	synaptotagmin XIV [Source:MGI Symbol;Acc:MGI:2444490]
ENSMUSG00000016262	14.7091	-1.04985	0.29018	-3.61791	0.000296987	0.00184578	Sertad4	1	-1	protein_coding	192844431	192855752	SERTA domain containing 4 [Source:MGI Symbol;Acc:MGI:2443496]
ENSMUSG00000016346	29.2127	1.19007	0.231594	5.13862	2.76767e-07	2.89461e-06	Kcnq2	2	-1	protein_coding	181075579	181135291	potassium voltage-gated channel, subfamily Q, member 2 [Source:MGI Symbol;Acc:MGI:1309503]
ENSMUSG00000016495	458.62	0.822971	0.0816111	10.0841	6.49804e-24	2.84335e-22	Plgrkt	19	-1	protein_coding	29348599	29367390	plasminogen receptor, C-terminal lysine transmembrane protein [Source:MGI Symbol;Acc:MGI:1915009]
ENSMUSG00000016496	50.0774	0.823348	0.15396	5.34781	8.90258e-08	9.92426e-07	Cd274	19	1	protein_coding	29367455	29388095	CD274 antigen [Source:MGI Symbol;Acc:MGI:1926446]
ENSMUSG00000016510	267.127	1.01396	0.0776767	13.0536	6.06027e-39	5.12787e-37	Mtif3	5	-1	protein_coding	146951573	146963800	mitochondrial translational initiation factor 3 [Source:MGI Symbol;Acc:MGI:1923616]
ENSMUSG00000017314	1734.41	0.851527	0.0599717	14.1988	9.31705e-46	1.0224e-43	Mpp2	11	-1	protein_coding	102057015	102088515	membrane protein, palmitoylated 2 (MAGUK p55 subfamily member 2) [Source:MGI Symbol;Acc:MGI:1858257]
ENSMUSG00000017412	41.8885	2.83272	0.246274	11.5023	1.28433e-30	7.42371e-29	Cacnb4	2	-1	protein_coding	52428320	52676831	calcium channel, voltage-dependent, beta 4 subunit [Source:MGI Symbol;Acc:MGI:103301]
ENSMUSG00000017929	544.543	0.996885	0.0822701	12.1172	8.56196e-34	5.72673e-32	B4galt5	2	-1	protein_coding	167298444	167349183	UDP-Gal:betaGlcNAc beta 1,4-galactosyltransferase, polypeptide 5 [Source:MGI Symbol;Acc:MGI:1927169]
ENSMUSG00000018102	232.475	-0.648021	0.0861544	-7.52162	5.4102e-14	1.13251e-12	Hist1h2bc	13	1	protein_coding	23684199	23692488	histone cluster 1, H2bc [Source:MGI Symbol;Acc:MGI:1915274]
ENSMUSG00000018334	782.839	0.968132	0.0585037	16.5482	1.6492e-61	2.89559e-59	Ksr1	11	-1	protein_coding	79013440	79146407	kinase suppressor of ras 1 [Source:MGI Symbol;Acc:MGI:105051]
ENSMUSG00000018398	2930.15	-0.720977	0.0656472	-10.9826	4.63319e-28	2.43737e-26	Sept8	11	1	protein_coding	53519257	53549565	septin 8 [Source:MGI Symbol;Acc:MGI:894310]
ENSMUSG00000018427	107.244	1.14622	0.118891	9.64095	5.36869e-22	2.02711e-20	Ypel2	11	-1	protein_coding	86936425	86993707	yippee-like 2 (Drosophila) [Source:MGI Symbol;Acc:MGI:1925114]
ENSMUSG00000018507	152.055	-0.874785	0.122835	-7.12161	1.06676e-12	1.96895e-11	Trpv2	11	1	protein_coding	62574486	62600515	transient receptor potential cation channel, subfamily V, member 2 [Source:MGI Symbol;Acc:MGI:1341836]
ENSMUSG00000018566	245.063	-1.72765	0.42527	-4.06249	4.85515e-05	0.000362741	Slc2a4	11	-1	protein_coding	69942539	69948188	solute carrier family 2 (facilitated glucose transporter), member 4 [Source:MGI Symbol;Acc:MGI:95758]
ENSMUSG00000018931	750.292	-0.606669	0.0665917	-9.11029	8.21634e-20	2.68388e-18	Gm16515	11	-1	protein_coding	60902246	60914750	predicted gene, Gm16515 [Source:MGI Symbol;Acc:MGI:1344388]
ENSMUSG00000018983	4959.9	-2.01322	0.296829	-6.78243	1.1817e-11	1.97597e-10	E2f2	4	1	protein_coding	136172394	136196057	E2F transcription factor 2 [Source:MGI Symbol;Acc:MGI:1096341]
ENSMUSG00000019027	34.9028	1.461	0.201554	7.24869	4.20818e-13	8.08593e-12	Dnahc1	14	-1	protein_coding	31260375	31323896	dynein, axonemal, heavy chain 1 [Source:MGI Symbol;Acc:MGI:107721]
ENSMUSG00000019088	235.236	-1.73959	0.12005	-14.4905	1.39212e-47	1.6571e-45	Dnase1l1	X	-1	protein_coding	74273217	74282337	deoxyribonuclease 1-like 1 [Source:MGI Symbol;Acc:MGI:109628]
ENSMUSG00000019467	254.094	-0.682403	0.087077	-7.83677	4.6227e-15	1.06443e-13	Arhgef25	10	-1	protein_coding	127182521	127190054	Rho guanine nucleotide exchange factor (GEF) 25 [Source:MGI Symbol;Acc:MGI:1277173]
ENSMUSG00000019564	1907.58	1.42958	0.0672418	21.2602	2.65034e-100	1.00613e-97	Arid3a	10	1	protein_coding	79927043	79955018	AT rich interactive domain 3A (BRIGHT-like) [Source:MGI Symbol;Acc:MGI:1328360]
ENSMUSG00000019789	10.747	-1.01103	0.320391	-3.15561	0.00160162	0.00833507	Hey2	10	-1	protein_coding	30832359	30842801	hairy/enhancer-of-split related with YRPW motif 2 [Source:MGI Symbol;Acc:MGI:1341884]
ENSMUSG00000019810	1259.56	0.675975	0.0587985	11.4965	1.37415e-30	7.91038e-29	Fuca2	10	1	protein_coding	13499540	13519035	fucosidase, alpha-L- 2, plasma [Source:MGI Symbol;Acc:MGI:1914098]
ENSMUSG00000019820	1021.98	0.714714	0.0911669	7.83962	4.51917e-15	1.0423e-13	Utrn	10	-1	protein_coding	12382188	12861735	utrophin [Source:MGI Symbol;Acc:MGI:104631]
ENSMUSG00000019866	155.376	2.67667	0.172854	15.4851	4.37077e-54	6.60127e-52	Aim1	10	-1	protein_coding	43950307	44004846	absent in melanoma 1 [Source:MGI Symbol;Acc:MGI:109544]
ENSMUSG00000019872	176.305	-0.915066	0.132501	-6.90613	4.98051e-12	8.57308e-11	Smpdl3a	10	1	protein_coding	57794335	57811830	sphingomyelin phosphodiesterase, acid-like 3A [Source:MGI Symbol;Acc:MGI:1931437]
ENSMUSG00000020007	11.0494	1.50593	0.339053	4.44157	8.93062e-06	7.55205e-05	Il20ra	10	1	protein_coding	19712587	19760053	interleukin 20 receptor, alpha [Source:MGI Symbol;Acc:MGI:3605069]
ENSMUSG00000020019	54.9697	0.586722	0.178593	3.28525	0.00101891	0.00558159	Ntn4	10	1	protein_coding	93640681	93747207	netrin 4 [Source:MGI Symbol;Acc:MGI:1888978]
ENSMUSG00000020020	27.6119	-2.01265	0.244929	-8.21726	2.082e-16	5.36584e-15	Usp44	10	1	protein_coding	93831555	93848524	ubiquitin specific peptidase 44 [Source:MGI Symbol;Acc:MGI:3045318]
ENSMUSG00000020097	601.959	-0.742152	0.0795762	-9.32631	1.09618e-20	3.77375e-19	Sgpl1	10	-1	protein_coding	61098642	61147703	sphingosine phosphate lyase 1 [Source:MGI Symbol;Acc:MGI:1261415]
ENSMUSG00000020182	159.899	0.631163	0.089872	7.02291	2.17297e-12	3.86838e-11	Ddc	11	-1	protein_coding	11814101	11898144	dopa decarboxylase [Source:MGI Symbol;Acc:MGI:94876]
ENSMUSG00000020189	1084.8	-0.812447	0.0669468	-12.1357	6.83135e-34	4.63542e-32	Osbpl8	10	1	protein_coding	111164802	111297247	oxysterol binding protein-like 8 [Source:MGI Symbol;Acc:MGI:2443807]
ENSMUSG00000020196	2882.48	0.754319	0.0490068	15.3921	1.84865e-53	2.76236e-51	Cabin1	10	-1	protein_coding	75646110	75764357	calcineurin binding protein 1 [Source:MGI Symbol;Acc:MGI:1298375]
ENSMUSG00000020205	168.678	0.974531	0.112227	8.68361	3.83399e-18	1.11265e-16	Phlda1	10	1	protein_coding	111506286	111508645	pleckstrin homology-like domain, family A, member 1 [Source:MGI Symbol;Acc:MGI:1096880]
ENSMUSG00000020282	211.251	0.691632	0.0895092	7.72694	1.10164e-14	2.42534e-13	Rhbdf1	11	-1	protein_coding	32209585	32222300	rhomboid family 1 (Drosophila) [Source:MGI Symbol;Acc:MGI:104328]
ENSMUSG00000020334	736.166	-0.776497	0.235311	-3.29988	0.000967256	0.00533834	Slc22a4	11	-1	protein_coding	53983123	54028090	solute carrier family 22 (organic cation transporter), member 4 [Source:MGI Symbol;Acc:MGI:1353479]
ENSMUSG00000020402	7176.51	0.927841	0.0680486	13.635	2.48092e-42	2.45401e-40	Vdac1	11	1	protein_coding	52360860	52389397	voltage-dependent anion channel 1 [Source:MGI Symbol;Acc:MGI:106919]
ENSMUSG00000020424	45.4883	0.785923	0.16989	4.62607	3.72664e-06	3.36404e-05	Gatsl3	11	1	protein_coding	4218225	4222409	GATS protein-like 3 [Source:MGI Symbol;Acc:MGI:1919212]
ENSMUSG00000020458	2621.52	1.33988	0.164187	8.16069	3.33108e-16	8.40006e-15	Rtn4	11	1	protein_coding	29692947	29744331	reticulon 4 [Source:MGI Symbol;Acc:MGI:1915835]
ENSMUSG00000020481	98.8644	3.23109	0.20996	15.3891	1.93795e-53	2.86531e-51	Ankrd36	11	1	protein_coding	5569684	5689337	ankyrin repeat domain 36 [Source:MGI Symbol;Acc:MGI:1923639]
ENSMUSG00000020490	929.982	-1.03164	0.0772682	-13.3514	1.16209e-40	1.06684e-38	Btnl10	11	1	protein_coding	58917908	58927158	butyrophilin-like 10 [Source:MGI Symbol;Acc:MGI:2182073]
ENSMUSG00000020538	2488.32	0.682098	0.0541364	12.5996	2.12197e-36	1.6287e-34	Srebf1	11	-1	protein_coding	60199089	60222581	sterol regulatory element binding transcription factor 1 [Source:MGI Symbol;Acc:MGI:107606]
ENSMUSG00000020577	631.493	1.02974	0.0710902	14.485	1.50757e-47	1.77944e-45	Tspan13	12	-1	protein_coding	36014557	36042500	tetraspanin 13 [Source:MGI Symbol;Acc:MGI:1913359]
ENSMUSG00000020593	1777.33	3.25968	0.149881	21.7484	7.15799e-105	2.87261e-102	Lpin1	12	-1	protein_coding	16535669	16589770	lipin 1 [Source:MGI Symbol;Acc:MGI:1891340]
ENSMUSG00000020601	113.176	-0.719539	0.154823	-4.64749	3.36e-06	3.05467e-05	Trib2	12	-1	protein_coding	15791727	15816877	tribbles homolog 2 (Drosophila) [Source:MGI Symbol;Acc:MGI:2145021]
ENSMUSG00000020641	158.709	-1.39835	0.39726	-3.51998	0.000431579	0.00258176	Rsad2	12	-1	protein_coding	26442753	26456452	radical S-adenosyl methionine domain containing 2 [Source:MGI Symbol;Acc:MGI:1929628]
ENSMUSG00000020653	374.199	-0.61139	0.0729831	-8.37715	5.42267e-17	1.45913e-15	Klf11	12	1	protein_coding	24651371	24662774	Kruppel-like factor 11 [Source:MGI Symbol;Acc:MGI:2653368]
ENSMUSG00000020656	25.9349	-1.76676	0.261148	-6.76537	1.32967e-11	2.21812e-10	Grhl1	12	1	protein_coding	24572287	24617391	grainyhead-like 1 (Drosophila) [Source:MGI Symbol;Acc:MGI:2182540]
ENSMUSG00000020782	465.568	0.853514	0.0701126	12.1735	4.30314e-34	2.94838e-32	Llgl2	11	1	protein_coding	115824049	115855780	lethal giant larvae homolog 2 (Drosophila) [Source:MGI Symbol;Acc:MGI:1918843]
ENSMUSG00000020866	136.33	-2.52403	0.303643	-8.3125	9.37059e-17	2.47871e-15	Cacna1g	11	-1	protein_coding	94408391	94474198	calcium channel, voltage-dependent, T type, alpha 1G subunit [Source:MGI Symbol;Acc:MGI:1201678]
ENSMUSG00000020895	136.416	-0.778381	0.11862	-6.562	5.30922e-11	8.36962e-10	Tmem107	11	1	protein_coding	69070806	69073293	transmembrane protein 107 [Source:MGI Symbol;Acc:MGI:1914160]
ENSMUSG00000020900	3384.27	-0.607215	0.0587703	-10.332	5.0493e-25	2.35623e-23	Myh10	11	1	protein_coding	68691559	68816632	myosin, heavy polypeptide 10, non-muscle [Source:MGI Symbol;Acc:MGI:1930780]
ENSMUSG00000020930	13.339	-1.817	0.350438	-5.18494	2.16087e-07	2.28723e-06	Ccdc103	11	1	protein_coding	102881204	102885216	coiled-coil domain containing 103 [Source:MGI Symbol;Acc:MGI:1920543]
ENSMUSG00000020932	329.31	-1.76972	0.140056	-12.6358	1.3402e-36	1.0458e-34	Gfap	11	-1	protein_coding	102887336	102900912	glial fibrillary acidic protein [Source:MGI Symbol;Acc:MGI:95697]
ENSMUSG00000020990	69.2812	-0.660225	0.162313	-4.06761	4.74979e-05	0.000355437	Cdkl1	12	-1	protein_coding	69746848	69790707	cyclin-dependent kinase-like 1 (CDC2-related kinase) [Source:MGI Symbol;Acc:MGI:1918341]
ENSMUSG00000021118	1510.61	0.786625	0.0989697	7.94814	1.89326e-15	4.52257e-14	Plek2	12	-1	protein_coding	78888691	78906964	pleckstrin 2 [Source:MGI Symbol;Acc:MGI:1351466]
ENSMUSG00000021143	2042.1	1.38592	0.0503119	27.5466	4.86268e-167	4.01772e-164	Pacs2	12	1	protein_coding	113014508	113074401	phosphofurin acidic cluster sorting protein 2 [Source:MGI Symbol;Acc:MGI:1924399]
ENSMUSG00000021203	593.508	-1.07394	0.175063	-6.13457	8.53919e-10	1.19108e-08	Otub2	12	1	protein_coding	103388682	103406350	OTU domain, ubiquitin aldehyde binding 2 [Source:MGI Symbol;Acc:MGI:1915399]
ENSMUSG00000021281	3038.42	-0.850363	0.0733184	-11.5982	4.20752e-31	2.48314e-29	Tnfaip2	12	1	protein_coding	111442469	111455018	tumor necrosis factor, alpha-induced protein 2 [Source:MGI Symbol;Acc:MGI:104960]
ENSMUSG00000021285	595.565	0.81791	0.0744551	10.9853	4.4988e-28	2.37557e-26	Ppp1r13b	12	-1	protein_coding	111828458	111908055	protein phosphatase 1, regulatory (inhibitor) subunit 13B [Source:MGI Symbol;Acc:MGI:1336199]
ENSMUSG00000021373	80.4253	0.633795	0.153672	4.12434	3.71807e-05	0.000283672	Cap2	13	1	protein_coding	46501848	46649642	CAP, adenylate cyclase-associated protein, 2 (yeast) [Source:MGI Symbol;Acc:MGI:1914502]
ENSMUSG00000021453	328.372	1.1239	0.0850324	13.2174	6.96614e-40	6.15386e-38	Gadd45g	13	1	protein_coding	51846678	51848468	growth arrest and DNA-damage-inducible 45 gamma [Source:MGI Symbol;Acc:MGI:1346325]
ENSMUSG00000021493	547.629	0.791475	0.0959504	8.2488	1.59994e-16	4.13863e-15	Pdlim7	13	-1	protein_coding	55495795	55513676	PDZ and LIM domain 7 [Source:MGI Symbol;Acc:MGI:1914649]
ENSMUSG00000021585	1161.86	-1.09581	0.0801278	-13.6758	1.41582e-42	1.42048e-40	Cast	13	-1	protein_coding	74694286	74807921	calpastatin [Source:MGI Symbol;Acc:MGI:1098236]
ENSMUSG00000021591	646.077	0.777709	0.236108	3.29387	0.000988177	0.00544525	Glrx	13	1	protein_coding	75839868	75850151	glutaredoxin [Source:MGI Symbol;Acc:MGI:2135625]
ENSMUSG00000021608	3216.35	-0.779473	0.0530171	-14.7023	6.22979e-49	7.74368e-47	Lpcat1	13	1	protein_coding	73467197	73516422	lysophosphatidylcholine acyltransferase 1 [Source:MGI Symbol;Acc:MGI:2384812]
ENSMUSG00000021706	331.611	1.07555	0.0797715	13.4829	1.97157e-41	1.87113e-39	Zfyve16	13	-1	protein_coding	92487108	92530868	zinc finger, FYVE domain containing 16 [Source:MGI Symbol;Acc:MGI:2145181]
ENSMUSG00000021792	963.449	-0.90345	0.195941	-4.61082	4.01086e-06	3.59061e-05	Fam213a	14	-1	protein_coding	40993740	41013788	family with sequence similarity 213, member A [Source:MGI Symbol;Acc:MGI:1917814]
ENSMUSG00000021815	45.1617	-0.606992	0.167416	-3.62565	0.000288232	0.00180014	Mss51	14	-1	protein_coding	20482864	20496901	MSS51 mitochondrial translational activator [Source:MGI Symbol;Acc:MGI:1922093]
ENSMUSG00000021928	146.771	0.62551	0.0996729	6.27563	3.48223e-10	5.00629e-09	Ebpl	14	-1	protein_coding	61339763	61360445	emopamil binding protein-like [Source:MGI Symbol;Acc:MGI:1915427]
ENSMUSG00000021959	247.895	-0.91997	0.105751	-8.69944	3.33523e-18	9.71921e-17	Lats2	14	-1	protein_coding	57642077	57758388	large tumor suppressor 2 [Source:MGI Symbol;Acc:MGI:1354386]
ENSMUSG00000021990	927.711	-1.03262	0.117826	-8.76392	1.88584e-18	5.64787e-17	Spata13	14	1	protein_coding	60634001	60764556	spermatogenesis associated 13 [Source:MGI Symbol;Acc:MGI:104838]
ENSMUSG00000022018	1026.95	-2.01652	0.313588	-6.43049	1.27189e-10	1.93344e-09	Rgcc	14	-1	protein_coding	79288756	79301645	regulator of cell cycle [Source:MGI Symbol;Acc:MGI:1913464]
ENSMUSG00000022092	45.0616	1.22795	0.186284	6.59182	4.34475e-11	6.87234e-10	Ppp3cc	14	-1	protein_coding	70217898	70289449	protein phosphatase 3, catalytic subunit, gamma isoform [Source:MGI Symbol;Acc:MGI:107162]
ENSMUSG00000022094	7466.5	4.76701	0.0889157	53.6127	0	0	Slc39a14	14	-1	protein_coding	70303469	70351425	solute carrier family 39 (zinc transporter), member 14 [Source:MGI Symbol;Acc:MGI:2384851]
ENSMUSG00000022099	4760.91	-2.33289	0.31248	-7.46572	8.28484e-14	1.69634e-12	Epb4.9	14	-1	protein_coding	70602184	70636048	erythrocyte protein band 4.9 [Source:MGI Symbol;Acc:MGI:99670]
ENSMUSG00000022100	10033.3	-1.69412	0.368185	-4.60127	4.19929e-06	3.74973e-05	Xpo7	14	-1	protein_coding	70654246	70766628	exportin 7 [Source:MGI Symbol;Acc:MGI:1929705]
ENSMUSG00000022103	53.607	-0.67281	0.181771	-3.70143	0.00021439	0.00138324	Gfra2	14	1	protein_coding	70890130	70979838	glial cell line derived neurotrophic factor family receptor alpha 2 [Source:MGI Symbol;Acc:MGI:1195462]
ENSMUSG00000022297	121.838	1.566	0.126002	12.4284	1.83186e-35	1.33317e-33	Fzd6	15	1	protein_coding	39006280	39038186	frizzled homolog 6 (Drosophila) [Source:MGI Symbol;Acc:MGI:108474]
ENSMUSG00000022438	5875.59	2.07716	0.0900829	23.0583	1.21306e-117	5.67953e-115	Parvb	15	1	protein_coding	84232043	84315688	parvin, beta [Source:MGI Symbol;Acc:MGI:2153063]
ENSMUSG00000022439	735.758	1.18722	0.0929663	12.7705	2.3964e-37	1.93447e-35	Parvg	15	1	protein_coding	84324026	84342978	parvin, gamma [Source:MGI Symbol;Acc:MGI:2158329]
ENSMUSG00000022475	761.435	-0.662514	0.0778347	-8.5118	1.71248e-17	4.77253e-16	Hdac7	15	-1	protein_coding	97792664	97844502	histone deacetylase 7 [Source:MGI Symbol;Acc:MGI:1891835]
ENSMUSG00000022514	108.395	0.81028	0.10685	7.58331	3.36846e-14	7.16869e-13	Il1rap	16	1	protein_coding	26581704	26730117	interleukin 1 receptor accessory protein [Source:MGI Symbol;Acc:MGI:104975]
ENSMUSG00000022574	341.749	-0.625108	0.0868559	-7.19708	6.15177e-13	1.16139e-11	Naprt1	15	-1	protein_coding	75890964	75894481	nicotinate phosphoribosyltransferase domain containing 1 [Source:MGI Symbol;Acc:MGI:2442664]
ENSMUSG00000022678	1477.97	-0.661051	0.0652466	-10.1316	4.00133e-24	1.7899e-22	Nde1	16	1	protein_coding	14163275	14192928	nuclear distribution gene E homolog 1 (A nidulans) [Source:MGI Symbol;Acc:MGI:1914453]
ENSMUSG00000022843	414.452	-1.33891	0.0801771	-16.6994	1.32392e-62	2.58274e-60	Clcn2	16	-1	protein_coding	20702964	20717746	chloride channel 2 [Source:MGI Symbol;Acc:MGI:105061]
ENSMUSG00000022912	650.759	0.587006	0.0639809	9.1747	4.52842e-20	1.50369e-18	Pros1	16	1	protein_coding	62854307	62929346	protein S (alpha) [Source:MGI Symbol;Acc:MGI:1095733]
ENSMUSG00000022982	8795.61	1.2632	0.06042	20.907	4.62361e-97	1.58398e-94	Sod1	16	1	protein_coding	90220742	90226322	superoxide dismutase 1, soluble [Source:MGI Symbol;Acc:MGI:98351]
ENSMUSG00000023048	1185.68	-0.611041	0.0650416	-9.39461	5.74273e-21	2.01153e-19	Prr13	15	1	protein_coding	102459028	102462806	proline rich 13 [Source:MGI Symbol;Acc:MGI:1913401]
ENSMUSG00000023232	72.3624	3.63463	0.246588	14.7397	3.58358e-49	4.57591e-47	Serinc2	4	-1	protein_coding	130253495	130279205	serine incorporator 2 [Source:MGI Symbol;Acc:MGI:1919132]
ENSMUSG00000023262	902.2	1.90869	0.158625	12.0327	2.39114e-33	1.57681e-31	Acy1	9	-1	protein_coding	106432996	106438236	aminoacylase 1 [Source:MGI Symbol;Acc:MGI:87913]
ENSMUSG00000023328	937.184	-1.00407	0.0795012	-12.6296	1.44984e-36	1.11893e-34	Ache	5	1	protein_coding	137287519	137294466	acetylcholinesterase [Source:MGI Symbol;Acc:MGI:87876]
ENSMUSG00000023495	506.767	0.685352	0.0954684	7.17883	7.03097e-13	1.32205e-11	Pcbp4	9	1	protein_coding	106453838	106464007	poly(rC) binding protein 4 [Source:MGI Symbol;Acc:MGI:1890471]
ENSMUSG00000023764	1728.96	3.91098	0.235474	16.609	5.99971e-62	1.10884e-59	Sfi1	11	-1	protein_coding	3131850	3193463	Sfi1 homolog, spindle assembly associated (yeast) [Source:MGI Symbol;Acc:MGI:1926137]
ENSMUSG00000023795	41.1126	0.656504	0.182091	3.60536	0.000311721	0.00192458	Pisd-ps2	17	-1	pseudogene	3076578	3084183	phosphatidylserine decarboxylase, pseudogene 2 [Source:MGI Symbol;Acc:MGI:3612472]
ENSMUSG00000023827	449.667	-1.04249	0.098204	-10.6155	2.52387e-26	1.2017e-24	Agpat4	17	1	protein_coding	12118704	12219645	1-acylglycerol-3-phosphate O-acyltransferase 4 (lysophosphatidic acid acyltransferase, delta) [Source:MGI Symbol;Acc:MGI:1915512]
ENSMUSG00000023909	230.092	1.63186	0.163503	9.98057	1.85392e-23	7.79645e-22	Paqr4	17	-1	protein_coding	23736186	23740330	progestin and adipoQ receptor family member IV [Source:MGI Symbol;Acc:MGI:1923748]
ENSMUSG00000023942	2738.16	-0.773425	0.0783513	-9.87124	5.54729e-23	2.24546e-21	Slc29a1	17	-1	protein_coding	45585200	45599606	solute carrier family 29 (nucleoside transporters), member 1 [Source:MGI Symbol;Acc:MGI:1927073]
ENSMUSG00000023990	146.815	0.680046	0.0920658	7.38652	1.50724e-13	2.99444e-12	Tfeb	17	1	protein_coding	47737030	47792419	transcription factor EB [Source:MGI Symbol;Acc:MGI:103270]
ENSMUSG00000023995	1119.19	-1.34141	0.360138	-3.72471	0.000195543	0.00127275	Tspo2	17	-1	protein_coding	48447956	48451522	translocator protein 2 [Source:MGI Symbol;Acc:MGI:1917276]
ENSMUSG00000024008	51.1246	1.84423	0.179838	10.2549	1.12466e-24	5.17932e-23	Cpne5	17	-1	protein_coding	29156550	29237797	copine V [Source:MGI Symbol;Acc:MGI:2385908]
ENSMUSG00000024034	18.2331	0.963886	0.275588	3.49756	0.000469536	0.00278326	Tmprss3	17	-1	protein_coding	31179272	31198975	transmembrane protease, serine 3 [Source:MGI Symbol;Acc:MGI:2155445]
ENSMUSG00000024036	117.46	1.16379	0.118344	9.834	8.03593e-23	3.22493e-21	Slc37a1	17	1	protein_coding	31295483	31350696	solute carrier family 37 (glycerol-3-phosphate transporter), member 1 [Source:MGI Symbol;Acc:MGI:2446181]
ENSMUSG00000024053	1925.69	0.889696	0.0759438	11.7152	1.06562e-31	6.56476e-30	Emilin2	17	-1	protein_coding	71252176	71310965	elastin microfibril interfacer 2 [Source:MGI Symbol;Acc:MGI:2389136]
ENSMUSG00000024074	327.481	0.776145	0.0827665	9.37752	6.75446e-21	2.36003e-19	Crim1	17	1	protein_coding	78200248	78376592	cysteine rich transmembrane BMP regulator 1 (chordin like) [Source:MGI Symbol;Acc:MGI:1354756]
ENSMUSG00000024130	2828.32	0.769178	0.0512502	15.0083	6.4771e-51	8.91935e-49	Abca3	17	1	protein_coding	24351950	24410201	ATP-binding cassette, sub-family A (ABC1), member 3 [Source:MGI Symbol;Acc:MGI:1351617]
ENSMUSG00000024155	23.378	-2.36496	0.304187	-7.77469	7.56328e-15	1.70794e-13	Meiob	17	1	protein_coding	24804382	24839787	meiosis specific with OB domains [Source:MGI Symbol;Acc:MGI:1922428]
ENSMUSG00000024169	2065.18	-1.55264	0.305979	-5.07433	3.8887e-07	4.01328e-06	Ift140	17	1	protein_coding	25016091	25099495	intraflagellar transport 140 [Source:MGI Symbol;Acc:MGI:2146906]
ENSMUSG00000024184	22.6698	-2.1325	0.253327	-8.41796	3.83083e-17	1.04077e-15	Pdia2	17	-1	protein_coding	26195999	26199087	protein disulfide isomerase associated 2 [Source:MGI Symbol;Acc:MGI:1916441]
ENSMUSG00000024190	564.63	-1.02625	0.110459	-9.29077	1.53173e-20	5.20937e-19	Dusp1	17	-1	protein_coding	26505590	26508519	dual specificity phosphatase 1 [Source:MGI Symbol;Acc:MGI:105120]
ENSMUSG00000024197	1065.27	0.735756	0.0597943	12.3048	8.5369e-35	6.0256e-33	Plin3	17	-1	protein_coding	56278962	56290511	perilipin 3 [Source:MGI Symbol;Acc:MGI:1914155]
ENSMUSG00000024206	727.246	-0.654546	0.0594798	-11.0045	3.63517e-28	1.93408e-26	Rfx2	17	-1	protein_coding	56775897	56831008	regulatory factor X, 2 (influences HLA class II expression) [Source:MGI Symbol;Acc:MGI:106583]
ENSMUSG00000024247	563.138	0.66072	0.0891589	7.41059	1.25736e-13	2.52299e-12	Pkdcc	17	1	protein_coding	83215292	83225070	protein kinase domain containing, cytoplasmic [Source:MGI Symbol;Acc:MGI:2147077]
ENSMUSG00000024544	51.5676	-1.30288	0.202805	-6.42429	1.32485e-10	2.00527e-09	Ldlrad4	18	1	protein_coding	67933257	68255549	low density lipoprotein receptor class A domain containing 4 [Source:MGI Symbol;Acc:MGI:1277150]
ENSMUSG00000024587	10162.4	0.92934	0.0664926	13.9766	2.16622e-44	2.30505e-42	Nars	18	-1	protein_coding	64499665	64516557	asparaginyl-tRNA synthetase [Source:MGI Symbol;Acc:MGI:1917473]
ENSMUSG00000024664	1107.29	3.05479	0.100034	30.5377	8.24471e-205	1.28673e-201	Fads3	19	1	protein_coding	10041548	10059671	fatty acid desaturase 3 [Source:MGI Symbol;Acc:MGI:1928740]
ENSMUSG00000024681	112.976	0.754174	0.216199	3.48834	0.000486039	0.00286965	Ms4a3	19	-1	protein_coding	11629497	11640834	membrane-spanning 4-domains, subfamily A, member 3 [Source:MGI Symbol;Acc:MGI:2158468]
ENSMUSG00000024697	45.2051	1.06142	0.162218	6.54313	6.02443e-11	9.45465e-10	Gna14	19	1	protein_coding	16435667	16610818	guanine nucleotide binding protein, alpha 14 [Source:MGI Symbol;Acc:MGI:95769]
ENSMUSG00000024772	3833.89	0.600036	0.047262	12.6959	6.22812e-37	4.97046e-35	Ehd1	19	1	protein_coding	6276725	6300096	EH-domain containing 1 [Source:MGI Symbol;Acc:MGI:1341878]
ENSMUSG00000024777	151.865	0.776658	0.108583	7.15267	8.51068e-13	1.58542e-11	Ppp2r5b	19	-1	protein_coding	6227765	6235872	protein phosphatase 2, regulatory subunit B (B56), beta isoform [Source:MGI Symbol;Acc:MGI:2388480]
ENSMUSG00000024787	1377.99	1.13124	0.0774913	14.5982	2.88229e-48	3.5204e-46	Snx15	19	-1	protein_coding	6119399	6128304	sorting nexin 15 [Source:MGI Symbol;Acc:MGI:1916274]
ENSMUSG00000024851	219.288	0.896515	0.0924354	9.69883	3.04988e-22	1.17689e-20	Pitpnm1	19	1	protein_coding	4099998	4113965	phosphatidylinositol transfer protein, membrane-associated 1 [Source:MGI Symbol;Acc:MGI:1197524]
ENSMUSG00000024900	743.032	0.612315	0.0712664	8.59192	8.55302e-18	2.43683e-16	Cpt1a	19	1	protein_coding	3323301	3385732	carnitine palmitoyltransferase 1a, liver [Source:MGI Symbol;Acc:MGI:1098296]
ENSMUSG00000024937	4651.31	-0.689182	0.0710425	-9.70099	2.986e-22	1.1586e-20	Ehbp1l1	19	-1	protein_coding	5707376	5726317	EH domain binding protein 1-like 1 [Source:MGI Symbol;Acc:MGI:3612340]
ENSMUSG00000024942	3559.71	0.823549	0.0595587	13.8275	1.73914e-43	1.78307e-41	Capn1	19	-1	protein_coding	5988546	6015825	calpain 1 [Source:MGI Symbol;Acc:MGI:88263]
ENSMUSG00000025006	334.762	-0.988221	0.100101	-9.87219	5.49493e-23	2.23716e-21	Sorbs1	19	-1	protein_coding	40295049	40402267	sorbin and SH3 domain containing 1 [Source:MGI Symbol;Acc:MGI:700014]
ENSMUSG00000025027	3606	0.814905	0.0458869	17.759	1.46812e-70	3.27321e-68	Xpnpep1	19	-1	protein_coding	52943417	53040214	X-prolyl aminopeptidase (aminopeptidase P) 1, soluble [Source:MGI Symbol;Acc:MGI:2180003]
ENSMUSG00000025147	1882.94	1.55142	0.0563588	27.5276	8.20993e-167	6.40648e-164	Mob2	7	-1	protein_coding	142008553	142061034	MOB kinase activator 2 [Source:MGI Symbol;Acc:MGI:1919891]
ENSMUSG00000025157	472.329	0.828352	0.102255	8.10086	5.45716e-16	1.35666e-14	Zdhhc16	19	1	protein_coding	41933472	41944095	zinc finger, DHHC domain containing 16 [Source:MGI Symbol;Acc:MGI:1921418]
ENSMUSG00000025175	668.385	-2.7898	0.518104	-5.38463	7.25934e-08	8.2429e-07	Fn3k	11	1	protein_coding	121434913	121450491	fructosamine 3 kinase [Source:MGI Symbol;Acc:MGI:1926834]
ENSMUSG00000025221	77.7444	1.23161	0.156804	7.85443	4.01606e-15	9.3239e-14	Kcnip2	19	-1	protein_coding	45791839	45816061	Kv channel-interacting protein 2 [Source:MGI Symbol;Acc:MGI:2135916]
ENSMUSG00000025400	43.5905	-3.26642	0.279718	-11.6775	1.6602e-31	1.00082e-29	Tac2	10	1	protein_coding	127724478	127731767	tachykinin 2 [Source:MGI Symbol;Acc:MGI:98476]
ENSMUSG00000025408	338.218	0.61657	0.0881752	6.99256	2.69922e-12	4.76297e-11	Ddit3	10	1	protein_coding	127290774	127296288	DNA-damage inducible transcript 3 [Source:MGI Symbol;Acc:MGI:109247]
ENSMUSG00000025473	120.438	2.05946	0.139419	14.7718	2.22739e-49	2.92392e-47	Adam8	7	-1	protein_coding	139978932	139992562	a disintegrin and metallopeptidase domain 8 [Source:MGI Symbol;Acc:MGI:107825]
ENSMUSG00000025491	94.375	0.635919	0.167633	3.79353	0.000148522	0.000990572	Ifitm1	7	1	protein_coding	140967221	140969825	interferon induced transmembrane protein 1 [Source:MGI Symbol;Acc:MGI:1915963]
ENSMUSG00000025497	17.8382	2.09464	0.325784	6.42952	1.28007e-10	1.94377e-09	Cdhr5	7	-1	protein_coding	141269085	141276786	cadherin-related family member 5 [Source:MGI Symbol;Acc:MGI:1919290]
ENSMUSG00000025498	672.045	3.36283	0.267884	12.5533	3.81113e-36	2.86263e-34	Irf7	7	-1	protein_coding	141262706	141266481	interferon regulatory factor 7 [Source:MGI Symbol;Acc:MGI:1859212]
ENSMUSG00000025500	26.3307	-0.692347	0.22306	-3.10386	0.00191012	0.00973038	1600016....	7	-1	protein_coding	141210043	141214082	RIKEN cDNA 1600016N20 gene [Source:MGI Symbol;Acc:MGI:1919250]
ENSMUSG00000025509	458.321	0.641656	0.0813903	7.8837	3.17834e-15	7.47201e-14	Pnpla2	7	1	protein_coding	141455198	141460743	patatin-like phospholipase domain containing 2 [Source:MGI Symbol;Acc:MGI:1914103]
ENSMUSG00000025573	1130.35	-0.738513	0.0833726	-8.85799	8.1473e-19	2.50409e-17	6030468....	11	1	protein_coding	117797660	117807301	RIKEN cDNA 6030468B19 gene [Source:MGI Symbol;Acc:MGI:1924977]
ENSMUSG00000025608	4116.39	0.80658	0.0648521	12.4372	1.64125e-35	1.20067e-33	Podxl	6	-1	protein_coding	31519488	31563981	podocalyxin-like [Source:MGI Symbol;Acc:MGI:1351317]
ENSMUSG00000025647	1174.81	2.70764	0.0919508	29.4467	1.38932e-190	1.39388e-187	Shisa5	9	1	protein_coding	109038565	109057724	shisa homolog 5 (Xenopus laevis) [Source:MGI Symbol;Acc:MGI:1915044]
ENSMUSG00000025648	552.321	3.62718	0.17691	20.5029	2.02671e-93	6.46981e-91	Pfkfb4	9	1	protein_coding	108991902	109032223	6-phosphofructo-2-kinase/fructose-2,6-biphosphatase 4 [Source:MGI Symbol;Acc:MGI:2687284]
ENSMUSG00000025701	213.371	0.743319	0.0841381	8.83451	1.00535e-18	3.06316e-17	Alox5	6	-1	protein_coding	116410077	116461178	arachidonate 5-lipoxygenase [Source:MGI Symbol;Acc:MGI:87999]
ENSMUSG00000025702	3837.92	-0.860251	0.0886936	-9.69914	3.04066e-22	1.17656e-20	March8	6	1	protein_coding	116338024	116409540	membrane-associated ring finger (C3HC4) 8 [Source:MGI Symbol;Acc:MGI:1919029]
ENSMUSG00000025934	312.366	0.885048	0.136428	6.48731	8.73807e-11	1.35022e-09	Gsta3	1	1	protein_coding	21240589	21265361	glutathione S-transferase, alpha 3 [Source:MGI Symbol;Acc:MGI:95856]
ENSMUSG00000026069	169.599	-1.50913	0.324773	-4.64672	3.37254e-06	3.06408e-05	Il1rl1	1	1	protein_coding	40429570	40465415	interleukin 1 receptor-like 1 [Source:MGI Symbol;Acc:MGI:98427]
ENSMUSG00000026131	1197.34	0.770007	0.0839611	9.17099	4.68708e-20	1.54542e-18	Dst	1	1	protein_coding	33908225	34308652	dystonin [Source:MGI Symbol;Acc:MGI:104627]
ENSMUSG00000026159	5196.98	0.59438	0.0608021	9.77565	1.43234e-22	5.63548e-21	Agfg1	1	1	protein_coding	82839483	82896275	ArfGAP with FG repeats 1 [Source:MGI Symbol;Acc:MGI:1333754]
ENSMUSG00000026181	1896.4	1.86757	0.0611018	30.5649	3.58423e-205	6.29302e-202	Ppm1f	16	1	protein_coding	16896469	16927364	protein phosphatase 1F (PP2C domain containing) [Source:MGI Symbol;Acc:MGI:1918464]
ENSMUSG00000026280	1022.56	-0.728454	0.0710414	-10.2539	1.13607e-24	5.21477e-23	Atg4b	1	1	protein_coding	93751500	93789434	autophagy related 4B, cysteine peptidase [Source:MGI Symbol;Acc:MGI:1913865]
ENSMUSG00000026308	93.1747	6.20613	0.355571	17.454	3.21074e-68	6.73106e-66	Klhl30	1	1	protein_coding	91351016	91362416	kelch-like 30 [Source:MGI Symbol;Acc:MGI:1918038]
ENSMUSG00000026311	2722.96	0.647181	0.064491	10.0352	1.06725e-23	4.58426e-22	Asb1	1	1	protein_coding	91540565	91559590	ankyrin repeat and SOCS box-containing 1 [Source:MGI Symbol;Acc:MGI:1929735]
ENSMUSG00000026317	1730.61	0.696103	0.0678011	10.2668	9.94065e-25	4.59297e-23	Cln8	8	1	protein_coding	14881335	14901720	ceroid-lipofuscinosis, neuronal 8 [Source:MGI Symbol;Acc:MGI:1349447]
ENSMUSG00000026389	2326.98	-0.758093	0.0732607	-10.3479	4.27838e-25	2.00314e-23	Steap3	1	-1	protein_coding	120190757	120272705	STEAP family member 3 [Source:MGI Symbol;Acc:MGI:1915678]
ENSMUSG00000026399	455.354	-0.984497	0.0907813	-10.8447	2.11318e-27	1.07933e-25	Cd55	1	-1	protein_coding	130439027	130462744	CD55 antigen [Source:MGI Symbol;Acc:MGI:104850]
ENSMUSG00000026404	131.786	-0.810617	0.110749	-7.31938	2.49119e-13	4.86666e-12	Ddx59	1	1	protein_coding	136415271	136440158	DEAD (Asp-Glu-Ala-Asp) box polypeptide 59 [Source:MGI Symbol;Acc:MGI:1915247]
ENSMUSG00000026455	1171.49	-0.872832	0.0978965	-8.91587	4.84016e-19	1.50742e-17	Klhl12	1	1	protein_coding	134455531	134491018	kelch-like 12 [Source:MGI Symbol;Acc:MGI:2385619]
ENSMUSG00000026490	2528.04	0.615404	0.0631876	9.73932	2.04924e-22	8.01773e-21	Cdc42bpa	1	1	protein_coding	179960472	180165603	CDC42 binding protein kinase alpha [Source:MGI Symbol;Acc:MGI:2441841]
ENSMUSG00000026614	1928.02	-1.08105	0.0774256	-13.9624	2.64297e-44	2.79122e-42	Slc30a10	1	1	protein_coding	185454848	185468762	solute carrier family 30, member 10 [Source:MGI Symbol;Acc:MGI:2685058]
ENSMUSG00000026637	176.778	0.703734	0.114736	6.13351	8.59623e-10	1.19784e-08	Traf5	1	-1	protein_coding	191997430	192092559	TNF receptor-associated factor 5 [Source:MGI Symbol;Acc:MGI:107548]
ENSMUSG00000026678	29.1376	0.82918	0.211604	3.91854	8.90877e-05	0.000624414	Rgs5	1	1	protein_coding	169655501	169695813	regulator of G-protein signaling 5 [Source:MGI Symbol;Acc:MGI:1098434]
ENSMUSG00000026686	77.2816	1.34077	0.225233	5.95282	2.63568e-09	3.48066e-08	Lmx1a	1	1	protein_coding	167689239	167848741	LIM homeobox transcription factor 1 alpha [Source:MGI Symbol;Acc:MGI:1888519]
ENSMUSG00000026688	2200.13	-1.70509	0.173985	-9.80017	1.12392e-22	4.4595e-21	Mgst3	1	-1	protein_coding	167371966	167393841	microsomal glutathione S-transferase 3 [Source:MGI Symbol;Acc:MGI:1913697]
ENSMUSG00000026791	102.158	-0.74416	0.112783	-6.59814	4.16342e-11	6.60785e-10	Slc2a8	2	-1	protein_coding	32972990	32982083	solute carrier family 2, (facilitated glucose transporter), member 8 [Source:MGI Symbol;Acc:MGI:1860103]
ENSMUSG00000026880	4423.66	-0.609052	0.0850049	-7.16491	7.78398e-13	1.45584e-11	Stom	2	-1	protein_coding	35313986	35336976	stomatin [Source:MGI Symbol;Acc:MGI:95403]
ENSMUSG00000026970	2031.66	0.901546	0.0704543	12.7962	1.72209e-37	1.41453e-35	Rbms1	2	-1	protein_coding	60750193	60963192	RNA binding motif, single stranded interacting protein 1 [Source:MGI Symbol;Acc:MGI:1861774]
ENSMUSG00000027075	3763.91	-1.15717	0.0968278	-11.9508	6.43257e-33	4.16368e-31	Slc43a1	2	1	protein_coding	84838850	84863594	solute carrier family 43, member 1 [Source:MGI Symbol;Acc:MGI:1931352]
ENSMUSG00000027078	4462.15	-0.690518	0.162109	-4.25958	2.04813e-05	0.000162715	Ube2l6	2	1	protein_coding	84798828	84810335	ubiquitin-conjugating enzyme E2L 6 [Source:MGI Symbol;Acc:MGI:1914500]
ENSMUSG00000027217	515.428	1.6076	0.0958683	16.7689	4.12217e-63	8.15493e-61	Tspan18	2	-1	protein_coding	93201760	93334505	tetraspanin 18 [Source:MGI Symbol;Acc:MGI:1917186]
ENSMUSG00000027296	100.855	1.03289	0.225227	4.58601	4.518e-06	4.01645e-05	Itpka	2	1	protein_coding	119742337	119751263	inositol 1,4,5-trisphosphate 3-kinase A [Source:MGI Symbol;Acc:MGI:1333822]
ENSMUSG00000027313	12.0478	-1.67697	0.341165	-4.91542	8.85911e-07	8.73229e-06	Chac1	2	1	protein_coding	119351229	119354381	ChaC, cation transport regulator 1 [Source:MGI Symbol;Acc:MGI:1916315]
ENSMUSG00000027330	5853.91	-0.917642	0.140705	-6.52173	6.94999e-11	1.08226e-09	Cdc25b	2	1	protein_coding	131186949	131198497	cell division cycle 25B [Source:MGI Symbol;Acc:MGI:99701]
ENSMUSG00000027371	191.627	1.25632	0.136365	9.21289	3.17454e-20	1.06674e-18	Fahd2a	2	-1	protein_coding	127436215	127444565	fumarylacetoacetate hydrolase domain containing 2A [Source:MGI Symbol;Acc:MGI:1915376]
ENSMUSG00000027376	16.9357	4.60302	0.46307	9.94022	2.78221e-23	1.15338e-21	Prom2	2	-1	protein_coding	127526473	127541467	prominin 2 [Source:MGI Symbol;Acc:MGI:2138997]
ENSMUSG00000027378	163.057	-0.992131	0.103611	-9.57557	1.01294e-21	3.77394e-20	Nphp1	2	-1	protein_coding	127740732	127788897	nephronophthisis 1 (juvenile) homolog (human) [Source:MGI Symbol;Acc:MGI:1858233]
ENSMUSG00000027420	12.232	1.55264	0.336322	4.61652	3.90233e-06	3.5091e-05	Bfsp1	2	-1	protein_coding	143826528	143863173	beaded filament structural protein 1, in lens-CP94 [Source:MGI Symbol;Acc:MGI:101770]
ENSMUSG00000027463	26.1253	0.932837	0.273074	3.41605	0.000635357	0.00363364	Slc52a3	2	1	protein_coding	151996511	152009258	solute carrier protein family 52, member 3 [Source:MGI Symbol;Acc:MGI:1916948]
ENSMUSG00000027624	540.366	1.59686	0.0984679	16.217	3.82213e-59	6.39115e-57	Epb4.1l1	2	1	protein_coding	156420909	156543214	erythrocyte protein band 4.1-like 1 [Source:MGI Symbol;Acc:MGI:103010]
ENSMUSG00000027777	97.2033	0.740573	0.121157	6.11249	9.80906e-10	1.35475e-08	Schip1	3	1	protein_coding	68064802	68626481	schwannomin interacting protein 1 [Source:MGI Symbol;Acc:MGI:1353557]
ENSMUSG00000027834	28.7393	1.28742	0.236687	5.43933	5.34829e-08	6.1778e-07	Serpini1	3	1	protein_coding	75557547	75643495	serine (or cysteine) peptidase inhibitor, clade I, member 1 [Source:MGI Symbol;Acc:MGI:1194506]
ENSMUSG00000027869	228.65	-1.92978	0.163603	-11.7955	4.11758e-32	2.59352e-30	Hsd3b6	3	-1	protein_coding	98805504	98814443	hydroxy-delta-5-steroid dehydrogenase, 3 beta- and steroid delta-isomerase 6 [Source:MGI Symbol;Acc:MGI:109598]
ENSMUSG00000027883	1109.12	-0.764194	0.069379	-11.0148	3.2434e-28	1.7322e-26	Gpsm2	3	-1	protein_coding	108678638	108722187	G-protein signalling modulator 2 (AGS3-like, C. elegans) [Source:MGI Symbol;Acc:MGI:1923373]
ENSMUSG00000027961	168.364	0.916728	0.111693	8.20758	2.25694e-16	5.80603e-15	Lrrc39	3	1	protein_coding	116562973	116583134	leucine rich repeat containing 39 [Source:MGI Symbol;Acc:MGI:1924557]
ENSMUSG00000027994	32.5273	-3.02288	0.280037	-10.7946	3.65173e-27	1.83187e-25	Ccdc109b	3	-1	protein_coding	129914960	129970206	coiled-coil domain containing 109B [Source:MGI Symbol;Acc:MGI:1914065]
ENSMUSG00000028035	1866.21	0.996616	0.0751416	13.2632	3.78495e-40	3.38621e-38	Dnajb4	3	-1	protein_coding	152178511	152210279	DnaJ (Hsp40) homolog, subfamily B, member 4 [Source:MGI Symbol;Acc:MGI:1914285]
ENSMUSG00000028051	90.4179	-1.43171	0.149118	-9.60122	7.90069e-22	2.95141e-20	Hcn3	3	-1	protein_coding	89146074	89160196	hyperpolarization-activated, cyclic nucleotide-gated K+ 3 [Source:MGI Symbol;Acc:MGI:1298211]
ENSMUSG00000028078	168.201	-1.6341	0.112536	-14.5207	8.95833e-48	1.08473e-45	Dclk2	3	-1	protein_coding	86786150	86920884	doublecortin-like kinase 2 [Source:MGI Symbol;Acc:MGI:1918012]
ENSMUSG00000028108	679.708	2.64198	0.178428	14.8069	1.32106e-49	1.75054e-47	Ecm1	3	-1	protein_coding	95734147	95739569	extracellular matrix protein 1 [Source:MGI Symbol;Acc:MGI:103060]
ENSMUSG00000028238	11.1531	2.10425	0.418869	5.02365	5.06991e-07	5.15281e-06	Atp6v0d2	4	-1	protein_coding	19876841	19922605	ATPase, H+ transporting, lysosomal V0 subunit D2 [Source:MGI Symbol;Acc:MGI:1924415]
ENSMUSG00000028278	75.2011	-1.69745	0.1749	-9.70522	2.86462e-22	1.11768e-20	Rragd	4	1	protein_coding	32983037	33022180	Ras-related GTP binding D [Source:MGI Symbol;Acc:MGI:1098604]
ENSMUSG00000028328	2501.46	0.757304	0.0598625	12.6507	1.10863e-36	8.69931e-35	Tmod1	4	1	protein_coding	46038935	46116032	tropomodulin 1 [Source:MGI Symbol;Acc:MGI:98775]
ENSMUSG00000028435	299.465	-2.07367	0.153777	-13.4849	1.91861e-41	1.83325e-39	Aqp3	4	-1	protein_coding	41092722	41098183	aquaporin 3 [Source:MGI Symbol;Acc:MGI:1333777]
ENSMUSG00000028496	2908.97	0.611988	0.0680801	8.98923	2.48972e-19	7.92983e-18	Mllt3	4	-1	protein_coding	87769925	88033364	myeloid/lymphoid or mixed-lineage leukemia (trithorax homolog, Drosophila); translocated to, 3 [Source:MGI Symbol;Acc:MGI:1917372]
ENSMUSG00000028524	255.377	0.597033	0.125485	4.75782	1.95698e-06	1.85603e-05	Sgip1	4	1	protein_coding	102741297	102973628	SH3-domain GRB2-like (endophilin) interacting protein 1 [Source:MGI Symbol;Acc:MGI:1920344]
ENSMUSG00000028539	64.5267	-0.658461	0.148964	-4.42026	9.85826e-06	8.28164e-05	Artn	4	-1	protein_coding	117926162	117929763	artemin [Source:MGI Symbol;Acc:MGI:1333791]
ENSMUSG00000028551	476.864	-0.798426	0.0798416	-10.0001	1.52196e-23	6.47801e-22	Cdkn2c	4	-1	protein_coding	109660876	109667189	cyclin-dependent kinase inhibitor 2C (p18, inhibits CDK4) [Source:MGI Symbol;Acc:MGI:105388]
ENSMUSG00000028555	896.46	1.43487	0.100358	14.2976	2.26439e-46	2.58583e-44	Ttc39a	4	1	protein_coding	109406623	109444745	tetratricopeptide repeat domain 39A [Source:MGI Symbol;Acc:MGI:2444350]
ENSMUSG00000028559	654.992	-0.590495	0.0584871	-10.0961	5.74563e-24	2.52197e-22	Osbpl9	4	-1	protein_coding	109061145	109202272	oxysterol binding protein-like 9 [Source:MGI Symbol;Acc:MGI:1923784]
ENSMUSG00000028630	219.722	0.604648	0.0817164	7.39935	1.36853e-13	2.73434e-12	Dyrk2	10	-1	protein_coding	118859349	118868903	dual-specificity tyrosine-(Y)-phosphorylation regulated kinase 2 [Source:MGI Symbol;Acc:MGI:1330301]
ENSMUSG00000028649	4819.82	0.638258	0.0473481	13.4801	2.04769e-41	1.93033e-39	Macf1	4	-1	protein_coding	123349633	123684360	microtubule-actin crosslinking factor 1 [Source:MGI Symbol;Acc:MGI:108559]
ENSMUSG00000028716	1243.06	3.04471	0.192652	15.8042	2.91239e-56	4.64857e-54	Pdzk1ip1	4	1	protein_coding	115088708	115093899	PDZK1 interacting protein 1 [Source:MGI Symbol;Acc:MGI:1914432]
ENSMUSG00000028730	47.8141	-1.96898	0.54398	-3.61957	0.000295089	0.00183562	Wdr65	4	-1	protein_coding	118554551	118620777	WD repeat domain 65 [Source:MGI Symbol;Acc:MGI:2686209]
ENSMUSG00000028776	1445.45	1.70585	0.0932902	18.2854	1.08174e-74	2.71324e-72	Tinagl1	4	-1	protein_coding	130164454	130175122	tubulointerstitial nephritis antigen-like 1 [Source:MGI Symbol;Acc:MGI:2137617]
ENSMUSG00000028825	6491.97	-0.827089	0.0817807	-10.1135	4.81392e-24	2.14655e-22	Rhd	4	1	protein_coding	134864536	134896172	Rh blood group, D antigen [Source:MGI Symbol;Acc:MGI:1202882]
ENSMUSG00000028862	172.562	0.831692	0.0959348	8.66934	4.34617e-18	1.25352e-16	Map3k6	4	1	protein_coding	133240818	133252929	mitogen-activated protein kinase kinase kinase 6 [Source:MGI Symbol;Acc:MGI:1855691]
ENSMUSG00000028909	80.1421	-0.797324	0.174549	-4.56791	4.9262e-06	4.34905e-05	Ptpru	4	-1	protein_coding	131768457	131838288	protein tyrosine phosphatase, receptor type, U [Source:MGI Symbol;Acc:MGI:1321151]
ENSMUSG00000028923	1789.15	-0.588989	0.0576481	-10.217	1.66489e-24	7.59256e-23	Necap2	4	-1	protein_coding	141066512	141078357	NECAP endocytosis associated 2 [Source:MGI Symbol;Acc:MGI:1913397]
ENSMUSG00000029007	1110.28	1.88479	0.169811	11.0994	1.26342e-28	6.8783e-27	Agtrap	4	-1	protein_coding	148077061	148088031	angiotensin II, type I receptor-associated protein [Source:MGI Symbol;Acc:MGI:1339977]
ENSMUSG00000029009	595.351	-0.587955	0.0745001	-7.892	2.97382e-15	7.02021e-14	Mthfr	4	1	protein_coding	148039077	148059551	5,10-methylenetetrahydrofolate reductase [Source:MGI Symbol;Acc:MGI:106639]
ENSMUSG00000029027	422.936	1.33644	0.0791825	16.878	6.53489e-64	1.31127e-61	Dffb	4	-1	protein_coding	153964449	153975126	DNA fragmentation factor, beta subunit [Source:MGI Symbol;Acc:MGI:1196287]
ENSMUSG00000029186	530.364	-0.679051	0.0717698	-9.46151	3.03543e-21	1.09322e-19	Pi4k2b	5	1	protein_coding	52741587	52769344	phosphatidylinositol 4-kinase type 2 beta [Source:MGI Symbol;Acc:MGI:1914323]
ENSMUSG00000029385	490.864	1.05553	0.0870065	12.1317	7.17581e-34	4.84574e-32	Ccng2	5	1	protein_coding	93267257	93276231	cyclin G2 [Source:MGI Symbol;Acc:MGI:1095734]
ENSMUSG00000029408	208.633	0.852327	0.114454	7.44692	9.55423e-14	1.94209e-12	Abcb9	5	-1	protein_coding	124061530	124095798	ATP-binding cassette, sub-family B (MDR/TAP), member 9 [Source:MGI Symbol;Acc:MGI:1861729]
ENSMUSG00000029426	441.014	0.76278	0.0718873	10.6108	2.65517e-26	1.25995e-24	Scarb2	5	-1	protein_coding	92443873	92505608	scavenger receptor class B, member 2 [Source:MGI Symbol;Acc:MGI:1196458]
ENSMUSG00000029428	2700.72	-0.641304	0.0599751	-10.6928	1.09969e-26	5.38198e-25	Stx2	5	-1	protein_coding	128984557	129008574	syntaxin 2 [Source:MGI Symbol;Acc:MGI:108059]
ENSMUSG00000029513	2834.58	0.665353	0.0492926	13.498	1.60587e-41	1.55559e-39	Prkab1	5	-1	protein_coding	116013586	116024508	protein kinase, AMP-activated, beta 1 non-catalytic subunit [Source:MGI Symbol;Acc:MGI:1336167]
ENSMUSG00000029516	4762.26	0.654874	0.0917028	7.14126	9.24796e-13	1.71368e-11	Cit	5	1	protein_coding	115845278	116008947	citron [Source:MGI Symbol;Acc:MGI:105313]
ENSMUSG00000029534	317.367	0.588987	0.0786779	7.48606	7.09717e-14	1.46383e-12	St7	6	1	protein_coding	17692933	17943025	suppression of tumorigenicity 7 [Source:MGI Symbol;Acc:MGI:1927450]
ENSMUSG00000029570	183.622	-1.7199	0.121575	-14.1468	1.95589e-45	2.12965e-43	Lfng	5	1	protein_coding	140607341	140615543	LFNG O-fucosylpeptide 3-beta-N-acetylglucosaminyltransferase [Source:MGI Symbol;Acc:MGI:1095413]
ENSMUSG00000029601	28.3511	-0.651237	0.199234	-3.26871	0.00108039	0.00588412	Iqcd	5	1	protein_coding	120589016	120607114	IQ motif containing D [Source:MGI Symbol;Acc:MGI:1922982]
ENSMUSG00000029722	1054.52	-0.624256	0.0760754	-8.20575	2.29165e-16	5.88456e-15	Agfg2	5	-1	protein_coding	137650483	137684726	ArfGAP with FG repeats 2 [Source:MGI Symbol;Acc:MGI:2443267]
ENSMUSG00000029816	14.3616	1.39487	0.316289	4.41011	1.03318e-05	8.64325e-05	Gpnmb	6	1	protein_coding	49036518	49058182	glycoprotein (transmembrane) nmb [Source:MGI Symbol;Acc:MGI:1934765]
ENSMUSG00000030000	9131.39	0.722637	0.0506449	14.2687	3.42871e-46	3.88385e-44	Add2	6	1	protein_coding	86078084	86119555	adducin 2 (beta) [Source:MGI Symbol;Acc:MGI:87919]
ENSMUSG00000030051	394.246	-0.674097	0.0729778	-9.23702	2.53455e-20	8.53725e-19	Aplf	6	-1	protein_coding	87628429	87672168	aprataxin and PNKP like factor [Source:MGI Symbol;Acc:MGI:1919353]
ENSMUSG00000030055	1868.79	-0.924288	0.0998213	-9.25943	2.05534e-20	6.97325e-19	Rab43	6	-1	protein_coding	87788853	87812164	RAB43, member RAS oncogene family [Source:MGI Symbol;Acc:MGI:1917084]
ENSMUSG00000030075	67.1117	-1.15594	0.167185	-6.91415	4.70689e-12	8.12199e-11	Cntn3	6	-1	protein_coding	102163306	102464667	contactin 3 [Source:MGI Symbol;Acc:MGI:99534]
ENSMUSG00000030084	659.556	0.670844	0.0615815	10.8936	1.23663e-27	6.43321e-26	Plxna1	6	-1	protein_coding	89316316	89362613	plexin A1 [Source:MGI Symbol;Acc:MGI:107685]
ENSMUSG00000030091	4160.4	-0.987056	0.085515	-11.5425	8.05557e-31	4.69496e-29	Nup210	6	-1	protein_coding	91013068	91116829	nucleoporin 210 [Source:MGI Symbol;Acc:MGI:1859555]
ENSMUSG00000030117	253.586	0.706598	0.0951616	7.42525	1.1257e-13	2.27506e-12	Gdf3	6	-1	protein_coding	122605403	122610087	growth differentiation factor 3 [Source:MGI Symbol;Acc:MGI:95686]
ENSMUSG00000030144	15.3383	1.07885	0.276791	3.89771	9.71078e-05	0.00067624	Clec4d	6	1	protein_coding	123262107	123275268	C-type lectin domain family 4, member d [Source:MGI Symbol;Acc:MGI:1298389]
ENSMUSG00000030189	7513.47	-0.667638	0.0544907	-12.2523	1.63215e-34	1.14626e-32	Ybx3	6	-1	protein_coding	131364858	131388450	Y box protein 3 [Source:MGI Symbol;Acc:MGI:2137670]
ENSMUSG00000030207	1170.2	-0.959555	0.0626536	-15.3152	6.04868e-53	8.84997e-51	8430419....	6	1	protein_coding	135197977	135244955	RIKEN cDNA 8430419L09 gene [Source:MGI Symbol;Acc:MGI:1921775]
ENSMUSG00000030220	2422.19	0.938765	0.0946905	9.91404	3.61727e-23	1.48562e-21	Arhgdib	6	-1	protein_coding	136923523	136941899	Rho, GDP dissociation inhibitor (GDI) beta [Source:MGI Symbol;Acc:MGI:101940]
ENSMUSG00000030465	351.989	-0.96392	0.0975967	-9.87656	5.26071e-23	2.14802e-21	Psd3	8	-1	protein_coding	67689082	68062286	pleckstrin and Sec7 domain containing 3 [Source:MGI Symbol;Acc:MGI:1918215]
ENSMUSG00000030494	322.583	1.64669	0.0839534	19.6143	1.16771e-85	3.56556e-83	Rhpn2	7	1	protein_coding	35334175	35392285	rhophilin, Rho GTPase binding protein 2 [Source:MGI Symbol;Acc:MGI:1289234]
ENSMUSG00000030592	47.1787	-0.589352	0.164173	-3.58982	0.000330911	0.00203146	Ryr1	7	-1	protein_coding	29003340	29125151	ryanodine receptor 1, skeletal muscle [Source:MGI Symbol;Acc:MGI:99659]
ENSMUSG00000030595	619.462	0.732987	0.0681934	10.7487	6.01332e-27	2.98456e-25	Nfkbib	7	-1	protein_coding	28758251	28767512	nuclear factor of kappa light polypeptide gene enhancer in B cells inhibitor, beta [Source:MGI Symbol;Acc:MGI:104752]
ENSMUSG00000030681	1533.54	3.26951	0.14497	22.5529	1.2573e-112	5.69677e-110	Mvp	7	-1	protein_coding	126986860	127014621	major vault protein [Source:MGI Symbol;Acc:MGI:1925638]
ENSMUSG00000030708	132.344	-0.927301	0.134279	-6.9058	4.99204e-12	8.5824e-11	Dnajb13	7	-1	protein_coding	100503018	100514960	DnaJ (Hsp40) related, subfamily B, member 13 [Source:MGI Symbol;Acc:MGI:1916637]
ENSMUSG00000030737	816.323	5.94672	0.323301	18.3937	1.47467e-75	3.83578e-73	Slco2b1	7	-1	protein_coding	99657804	99711340	solute carrier organic anion transporter family, member 2b1 [Source:MGI Symbol;Acc:MGI:1351872]
ENSMUSG00000030747	1496.9	1.02448	0.316508	3.23682	0.00120871	0.00650479	Dgat2	7	-1	protein_coding	99153663	99182713	diacylglycerol O-acyltransferase 2 [Source:MGI Symbol;Acc:MGI:1915050]
ENSMUSG00000030748	1234.32	3.12373	0.19096	16.358	3.81162e-60	6.52902e-58	Il4ra	7	1	protein_coding	125552282	125579472	interleukin 4 receptor, alpha [Source:MGI Symbol;Acc:MGI:105367]
ENSMUSG00000030752	361.21	0.593124	0.0820665	7.22736	4.9249e-13	9.3988e-12	Kdm8	7	1	protein_coding	125444676	125462265	lysine (K)-specific demethylase 8 [Source:MGI Symbol;Acc:MGI:1924285]
ENSMUSG00000030760	442.647	-0.687376	0.0571439	-12.0289	2.50619e-33	1.64495e-31	Acer3	7	-1	protein_coding	98213658	98321208	alkaline ceramidase 3 [Source:MGI Symbol;Acc:MGI:1913440]
ENSMUSG00000030762	113.572	1.95296	0.148352	13.1644	1.40599e-39	1.22661e-37	Aqp8	7	1	protein_coding	123462294	123468003	aquaporin 8 [Source:MGI Symbol;Acc:MGI:1195271]
ENSMUSG00000030766	1089.66	0.658327	0.0477099	13.7985	2.60035e-43	2.6467e-41	Arhgap17	7	-1	protein_coding	123279150	123369915	Rho GTPase activating protein 17 [Source:MGI Symbol;Acc:MGI:1917747]
ENSMUSG00000030825	29.3112	1.36223	0.272201	5.0045	5.60071e-07	5.65141e-06	Hsd17b14	7	1	protein_coding	45554893	45567752	hydroxysteroid (17-beta) dehydrogenase 14 [Source:MGI Symbol;Acc:MGI:1913315]
ENSMUSG00000030872	4799.3	1.62805	0.0642677	25.3323	1.40726e-141	8.98469e-139	Gga2	7	-1	protein_coding	121986722	122021222	golgi associated, gamma adaptin ear containing, ARF binding protein 2 [Source:MGI Symbol;Acc:MGI:1921355]
ENSMUSG00000030878	3475.02	-0.732999	0.163987	-4.46987	7.82678e-06	6.72797e-05	Cdr2	7	-1	protein_coding	120957036	120982312	cerebellar degeneration-related 2 [Source:MGI Symbol;Acc:MGI:1100885]
ENSMUSG00000030956	1485.56	-1.04281	0.111947	-9.31519	1.21728e-20	4.18043e-19	Fam53b	7	-1	protein_coding	132712082	132813886	family with sequence similarity 53, member B [Source:MGI Symbol;Acc:MGI:1925188]
ENSMUSG00000030979	4699.79	0.902889	0.0581453	15.5282	2.23692e-54	3.4152e-52	Uros	7	-1	protein_coding	133686243	133710072	uroporphyrinogen III synthase [Source:MGI Symbol;Acc:MGI:98917]
ENSMUSG00000030986	642.251	0.846976	0.0668317	12.6733	8.31701e-37	6.56297e-35	Dhx32	7	-1	protein_coding	133720942	133782726	DEAH (Asp-Glu-Ala-His) box polypeptide 32 [Source:MGI Symbol;Acc:MGI:2141813]
ENSMUSG00000031024	1000.34	0.955584	0.0719787	13.2759	3.19283e-40	2.87477e-38	St5	7	-1	protein_coding	109523911	109617147	suppression of tumorigenicity 5 [Source:MGI Symbol;Acc:MGI:108517]
ENSMUSG00000031074	11.5793	1.69213	0.36162	4.67931	2.87838e-06	2.64765e-05	Fgf3	7	1	protein_coding	144838083	144844436	fibroblast growth factor 3 [Source:MGI Symbol;Acc:MGI:95517]
ENSMUSG00000031075	402.925	1.87049	0.108823	17.1884	3.24173e-66	6.59903e-64	Ano1	7	-1	protein_coding	144588549	144751974	anoctamin 1, calcium activated chloride channel [Source:MGI Symbol;Acc:MGI:2142149]
ENSMUSG00000031119	320.22	1.0277	0.0965934	10.6394	1.95334e-26	9.42839e-25	Gpc4	X	-1	protein_coding	52053021	52165252	glypican 4 [Source:MGI Symbol;Acc:MGI:104902]
ENSMUSG00000031137	98.4925	-1.32491	0.201562	-6.57322	4.92386e-11	7.77085e-10	Fgf13	X	-1	protein_coding	59062145	59568071	fibroblast growth factor 13 [Source:MGI Symbol;Acc:MGI:109178]
ENSMUSG00000031170	1170.46	-0.875161	0.0808481	-10.8248	2.62745e-27	1.33714e-25	Slc38a5	X	1	protein_coding	8271133	8280179	solute carrier family 38, member 5 [Source:MGI Symbol;Acc:MGI:2148066]
ENSMUSG00000031286	30.6785	3.39147	0.313593	10.8149	2.92623e-27	1.48382e-25	Glt28d2	3	-1	protein_coding	85801047	85887518	glycosyltransferase 28 domain containing 2 [Source:MGI Symbol;Acc:MGI:2443773]
ENSMUSG00000031337	138.083	0.596043	0.0982905	6.0641	1.32693e-09	1.81657e-08	Mtm1	X	1	protein_coding	71210767	71315691	X-linked myotubular myopathy gene 1 [Source:MGI Symbol;Acc:MGI:1099452]
ENSMUSG00000031402	1860.64	-1.53168	0.239118	-6.40555	1.49832e-10	2.25567e-09	Mpp1	X	-1	protein_coding	75109733	75131016	membrane protein, palmitoylated [Source:MGI Symbol;Acc:MGI:105941]
ENSMUSG00000031486	1290.68	2.57509	0.0874085	29.4604	9.27343e-191	1.00196e-187	Gpr124	8	1	protein_coding	27085583	27123436	G protein-coupled receptor 124 [Source:MGI Symbol;Acc:MGI:1925810]
ENSMUSG00000031628	1267.85	-0.590042	0.0620332	-9.51172	1.87544e-21	6.85999e-20	Casp3	8	1	protein_coding	46617449	46638706	caspase 3 [Source:MGI Symbol;Acc:MGI:107739]
ENSMUSG00000031659	2156.19	-1.20627	0.0636609	-18.9484	4.55202e-80	1.22957e-77	Adcy7	8	1	protein_coding	88272403	88329962	adenylate cyclase 7 [Source:MGI Symbol;Acc:MGI:102891]
ENSMUSG00000031732	977.097	-0.960472	0.0815968	-11.7709	5.51025e-32	3.45522e-30	Phlpp2	8	1	protein_coding	109868542	109944671	PH domain and leucine rich repeat protein phosphatase 2 [Source:MGI Symbol;Acc:MGI:2444928]
ENSMUSG00000031755	562.525	2.88602	0.175752	16.421	1.35221e-60	2.34483e-58	Bbs2	8	-1	protein_coding	94067954	94098811	Bardet-Biedl syndrome 2 (human) [Source:MGI Symbol;Acc:MGI:2135267]
ENSMUSG00000031760	68.1392	5.12792	0.30884	16.6038	6.5391e-62	1.17754e-59	Mt3	8	1	protein_coding	94152607	94154148	metallothionein 3 [Source:MGI Symbol;Acc:MGI:97173]
ENSMUSG00000031786	20.5645	1.70891	0.251835	6.78585	1.15408e-11	1.93208e-10	Ccdc135	8	1	protein_coding	95055103	95078141	coiled-coil domain containing 135 [Source:MGI Symbol;Acc:MGI:2685616]
ENSMUSG00000031803	86.9344	-1.31703	0.157671	-8.35301	6.65421e-17	1.7769e-15	B3gnt3	8	-1	protein_coding	71691719	71701800	UDP-GlcNAc:betaGal beta-1,3-N-acetylglucosaminyltransferase 3 [Source:MGI Symbol;Acc:MGI:2152535]
ENSMUSG00000031847	43.2241	0.940541	0.160958	5.84339	5.11497e-09	6.54921e-08	1700030....	8	-1	protein_coding	116969599	116978943	RIKEN cDNA 1700030J22 gene [Source:MGI Symbol;Acc:MGI:1916778]
ENSMUSG00000031872	14.549	3.03129	0.377711	8.0254	1.01192e-15	2.4676e-14	Bean1	8	1	protein_coding	104170513	104219092	brain expressed, associated with Nedd4, 1 [Source:MGI Symbol;Acc:MGI:1929597]
ENSMUSG00000031883	44.4539	0.938234	0.299851	3.129	0.00175403	0.0090294	Car7	8	1	protein_coding	104534700	104550343	carbonic anhydrase 7 [Source:MGI Symbol;Acc:MGI:103100]
ENSMUSG00000032014	1556.92	1.51469	0.0656365	23.0769	7.89369e-118	3.82327e-115	Oaf	9	-1	protein_coding	43221278	43239816	OAF homolog (Drosophila) [Source:MGI Symbol;Acc:MGI:94852]
ENSMUSG00000032020	1005.19	0.612047	0.0664523	9.21031	3.25171e-20	1.09006e-18	Ubash3b	9	-1	protein_coding	41011098	41161697	ubiquitin associated and SH3 domain containing, B [Source:MGI Symbol;Acc:MGI:1920078]
ENSMUSG00000032028	2579.39	-2.80838	0.463198	-6.06302	1.33591e-09	1.82531e-08	Nxpe2	9	-1	protein_coding	48318006	48353454	neurexophilin and PC-esterase domain family, member 2 [Source:MGI Symbol;Acc:MGI:1925502]
ENSMUSG00000032131	949.164	-1.00503	0.0716488	-14.0271	1.0641e-44	1.14094e-42	Abcg4	9	-1	protein_coding	44273188	44288615	ATP-binding cassette, sub-family G (WHITE), member 4 [Source:MGI Symbol;Acc:MGI:1890594]
ENSMUSG00000032177	174.068	0.648818	0.0872685	7.43474	1.04777e-13	2.12366e-12	Pde4a	9	1	protein_coding	21165714	21213248	phosphodiesterase 4A, cAMP specific [Source:MGI Symbol;Acc:MGI:99558]
ENSMUSG00000032204	425.662	0.597229	0.0706923	8.44829	2.95609e-17	8.10961e-16	Aqp9	9	-1	protein_coding	71110659	71168682	aquaporin 9 [Source:MGI Symbol;Acc:MGI:1891066]
ENSMUSG00000032285	334.972	-2.66224	0.459762	-5.79047	7.01884e-09	8.88168e-08	Dnaja4	9	1	protein_coding	54698873	54716315	DnaJ (Hsp40) homolog, subfamily A, member 4 [Source:MGI Symbol;Acc:MGI:1927638]
ENSMUSG00000032363	80.5068	1.1845	0.154576	7.66289	1.8179e-14	3.95879e-13	Adamts7	9	1	protein_coding	90162978	90208071	a disintegrin-like and metallopeptidase (reprolysin type) with thrombospondin type 1 motif, 7 [Source:MGI Symbol;Acc:MGI:1347346]
ENSMUSG00000032380	522.18	0.760567	0.135375	5.61821	1.92943e-08	2.34843e-07	Dapk2	9	1	protein_coding	66158223	66272242	death-associated protein kinase 2 [Source:MGI Symbol;Acc:MGI:1341297]
ENSMUSG00000032413	246.421	1.03582	0.116748	8.8723	7.1653e-19	2.2071e-17	Rasa2	9	-1	protein_coding	96539300	96631617	RAS p21 protein activator 2 [Source:MGI Symbol;Acc:MGI:2149960]
ENSMUSG00000032418	164.795	0.757274	0.0968164	7.82175	5.20921e-15	1.18973e-13	Me1	9	-1	protein_coding	86581363	86695914	malic enzyme 1, NADP(+)-dependent, cytosolic [Source:MGI Symbol;Acc:MGI:97043]
ENSMUSG00000032440	745.03	1.16971	0.0878642	13.3127	1.95229e-40	1.76915e-38	Tgfbr2	9	-1	protein_coding	116087698	116175363	transforming growth factor, beta receptor II [Source:MGI Symbol;Acc:MGI:98729]
ENSMUSG00000032507	54.6079	1.22905	0.168273	7.30391	2.79513e-13	5.43774e-12	Fbxl2	9	-1	protein_coding	113963637	114046191	F-box and leucine-rich repeat protein 2 [Source:MGI Symbol;Acc:MGI:1919429]
ENSMUSG00000032519	1682.33	-1.34139	0.156626	-8.56431	1.08729e-17	3.08526e-16	Slc25a38	9	1	protein_coding	120110374	120124504	solute carrier family 25, member 38 [Source:MGI Symbol;Acc:MGI:2384782]
ENSMUSG00000032527	921.49	1.30627	0.0715015	18.2691	1.45721e-74	3.59088e-72	Pccb	9	-1	protein_coding	100982032	101034898	propionyl Coenzyme A carboxylase, beta polypeptide [Source:MGI Symbol;Acc:MGI:1914154]
ENSMUSG00000032578	551.1	1.57691	0.122392	12.8841	5.53232e-38	4.59805e-36	Cish	9	1	protein_coding	107296026	107302784	cytokine inducible SH2-containing protein [Source:MGI Symbol;Acc:MGI:103159]
ENSMUSG00000032593	195.316	-0.657645	0.0940297	-6.99402	2.67122e-12	4.7195e-11	Amigo3	9	1	protein_coding	108053159	108055701	adhesion molecule with Ig like domain 3 [Source:MGI Symbol;Acc:MGI:2444854]
ENSMUSG00000032595	26.0793	0.804065	0.211864	3.79519	0.000147529	0.000986289	Cdhr4	9	1	protein_coding	107983287	107999684	cadherin-related family member 4 [Source:MGI Symbol;Acc:MGI:1916648]
ENSMUSG00000032596	2838.51	0.648235	0.074178	8.73892	2.35356e-18	6.94498e-17	Uba7	9	1	protein_coding	107975505	107984060	ubiquitin-like modifier activating enzyme 7 [Source:MGI Symbol;Acc:MGI:1349462]
ENSMUSG00000032598	160.434	0.607522	0.0951373	6.38574	1.70575e-10	2.53802e-09	Nckipsd	9	1	protein_coding	108808380	108818366	NCK interacting protein with SH3 domain [Source:MGI Symbol;Acc:MGI:1931834]
ENSMUSG00000032609	164.865	-1.38098	0.118003	-11.7029	1.2314e-31	7.48754e-30	Klhdc8b	9	-1	protein_coding	108447658	108452377	kelch domain containing 8B [Source:MGI Symbol;Acc:MGI:1925517]
ENSMUSG00000032679	777.282	-0.647747	0.120481	-5.37633	7.60184e-08	8.56946e-07	Cd59a	2	1	protein_coding	104095801	104115354	CD59a antigen [Source:MGI Symbol;Acc:MGI:109177]
ENSMUSG00000032698	3659.22	-0.942416	0.100906	-9.33959	9.67095e-21	3.34577e-19	Lmo2	2	1	protein_coding	103957986	103981878	LIM domain only 2 [Source:MGI Symbol;Acc:MGI:102811]
ENSMUSG00000032715	112.89	0.87676	0.209702	4.18099	2.90246e-05	0.000224295	Trib3	2	-1	protein_coding	152337422	152344032	tribbles homolog 3 (Drosophila) [Source:MGI Symbol;Acc:MGI:1345675]
ENSMUSG00000032750	23.2344	-1.10277	0.239521	-4.60405	4.1435e-06	3.70463e-05	Gab3	X	-1	protein_coding	74966843	75085458	growth factor receptor bound protein 2-associated protein 3 [Source:MGI Symbol;Acc:MGI:2387324]
ENSMUSG00000032802	1311.23	0.919304	0.0988884	9.29638	1.45309e-20	4.96595e-19	Srxn1	2	1	protein_coding	152105516	152111376	sulfiredoxin 1 homolog (S. cerevisiae) [Source:MGI Symbol;Acc:MGI:104971]
ENSMUSG00000032860	53.0957	0.732296	0.185398	3.94985	7.82001e-05	0.00055728	P2ry2	7	-1	protein_coding	100996572	101011991	purinergic receptor P2Y, G-protein coupled 2 [Source:MGI Symbol;Acc:MGI:105107]
ENSMUSG00000032902	3740.22	-0.760213	0.0787024	-9.65933	4.4877e-22	1.70363e-20	Slc16a1	3	1	protein_coding	104638668	104658462	solute carrier family 16 (monocarboxylic acid transporters), member 1 [Source:MGI Symbol;Acc:MGI:106013]
ENSMUSG00000033182	23.094	1.47794	0.256882	5.75336	8.7487e-09	1.0962e-07	Kbtbd12	6	-1	protein_coding	88547722	88627445	kelch repeat and BTB (POZ) domain containing 12 [Source:MGI Symbol;Acc:MGI:1918481]
ENSMUSG00000033256	342.666	2.0305	0.0835382	24.3063	1.68321e-130	9.45697e-128	Shf	2	-1	protein_coding	122348892	122369162	Src homology 2 domain containing F [Source:MGI Symbol;Acc:MGI:3613669]
ENSMUSG00000033499	5061.55	1.36151	0.0766888	17.7537	1.61499e-70	3.54439e-68	Larp4b	13	1	protein_coding	9093905	9173086	La ribonucleoprotein domain family, member 4B [Source:MGI Symbol;Acc:MGI:106330]
ENSMUSG00000033530	481.914	0.591973	0.0793667	7.45871	8.73752e-14	1.78612e-12	Ttc7b	12	-1	protein_coding	100300771	100520822	tetratricopeptide repeat domain 7B [Source:MGI Symbol;Acc:MGI:2144724]
ENSMUSG00000033540	202.16	0.958451	0.114609	8.36282	6.12362e-17	1.64146e-15	Idua	5	1	protein_coding	108660331	108684557	iduronidase, alpha-L- [Source:MGI Symbol;Acc:MGI:96418]
ENSMUSG00000033837	851.297	4.46303	0.122597	36.404	3.67658e-290	1.29103e-286	Foxh1	15	-1	protein_coding	76668284	76669948	forkhead box H1 [Source:MGI Symbol;Acc:MGI:1347465]
ENSMUSG00000033863	114.75	0.841441	0.120647	6.97441	3.07155e-12	5.37943e-11	Klf9	19	1	protein_coding	23141226	23166911	Kruppel-like factor 9 [Source:MGI Symbol;Acc:MGI:1333856]
ENSMUSG00000033955	658.465	1.33251	0.101591	13.1164	2.65225e-39	2.2996e-37	Tnks1bp1	2	1	protein_coding	85048022	85073048	tankyrase 1 binding protein 1 [Source:MGI Symbol;Acc:MGI:2446193]
ENSMUSG00000034006	812.593	-1.77236	0.238302	-7.43744	1.02655e-13	2.08366e-12	Pqlc1	18	1	protein_coding	80253292	80292725	PQ loop repeat containing 1 [Source:MGI Symbol;Acc:MGI:1914193]
ENSMUSG00000034110	237.938	-0.919273	0.0810204	-11.3462	7.74747e-30	4.33549e-28	Kctd7	5	1	protein_coding	130144861	130155806	potassium channel tetramerisation domain containing 7 [Source:MGI Symbol;Acc:MGI:2442265]
ENSMUSG00000034156	383.914	1.16088	0.19854	5.84707	5.003e-09	6.41169e-08	Bzrap1	11	1	protein_coding	87760541	87785928	benzodiazepine receptor associated protein 1 [Source:MGI Symbol;Acc:MGI:2450877]
ENSMUSG00000034245	284.59	-0.726963	0.138708	-5.24097	1.59733e-07	1.71007e-06	Hdac11	6	1	protein_coding	91156665	91174692	histone deacetylase 11 [Source:MGI Symbol;Acc:MGI:2385252]
ENSMUSG00000034248	40714.3	-1.35015	0.160843	-8.39422	4.6901e-17	1.27176e-15	Slc25a37	14	-1	protein_coding	69241851	69285103	solute carrier family 25, member 37 [Source:MGI Symbol;Acc:MGI:1914962]
ENSMUSG00000034266	59.1538	0.786439	0.14983	5.24887	1.53031e-07	1.64459e-06	Batf	12	1	protein_coding	85686669	85709087	basic leucine zipper transcription factor, ATF-like [Source:MGI Symbol;Acc:MGI:1859147]
ENSMUSG00000034295	56.0502	1.01842	0.146106	6.97045	3.15935e-12	5.52631e-11	Fhod3	18	1	protein_coding	24709445	25133500	formin homology 2 domain containing 3 [Source:MGI Symbol;Acc:MGI:1925847]
ENSMUSG00000034317	2525.38	-0.8721	0.0901079	-9.6784	3.72498e-22	1.41791e-20	Trim59	3	-1	protein_coding	69035288	69044755	tripartite motif-containing 59 [Source:MGI Symbol;Acc:MGI:1914199]
ENSMUSG00000034390	2208.81	0.69459	0.0470392	14.7662	2.42006e-49	3.11855e-47	Cmip	8	1	protein_coding	117257019	117461503	c-Maf inducing protein [Source:MGI Symbol;Acc:MGI:1921690]
ENSMUSG00000034449	3272.39	-0.761209	0.077807	-9.7833	1.32813e-22	5.24013e-21	Dhrs11	11	-1	protein_coding	84820856	84828994	dehydrogenase/reductase (SDR family) member 11 [Source:MGI Symbol;Acc:MGI:2652816]
ENSMUSG00000034471	725.436	-0.94894	0.0755362	-12.5627	3.38501e-36	2.57005e-34	Caskin2	11	-1	protein_coding	115799183	115813639	CASK-interacting protein 2 [Source:MGI Symbol;Acc:MGI:2157062]
ENSMUSG00000034557	1347.05	4.21155	0.118164	35.6415	3.18797e-278	8.95565e-275	Zfyve9	4	-1	protein_coding	108637466	108780798	zinc finger, FYVE domain containing 9 [Source:MGI Symbol;Acc:MGI:2652838]
ENSMUSG00000034573	351.122	0.707564	0.094636	7.47668	7.62207e-14	1.56749e-12	Ptpn13	5	1	protein_coding	103425192	103598359	protein tyrosine phosphatase, non-receptor type 13 [Source:MGI Symbol;Acc:MGI:103293]
ENSMUSG00000034593	610.376	1.38817	0.104974	13.2239	6.38567e-40	5.67678e-38	Myo5a	9	1	protein_coding	75071015	75223688	myosin VA [Source:MGI Symbol;Acc:MGI:105976]
ENSMUSG00000034687	292.049	-0.680763	0.125563	-5.42169	5.90398e-08	6.79175e-07	Fras1	5	1	protein_coding	96373955	96784728	Fraser syndrome 1 homolog (human) [Source:MGI Symbol;Acc:MGI:2385368]
ENSMUSG00000034762	12.7988	1.40929	0.314274	4.48426	7.31664e-06	6.31262e-05	Glis1	4	1	protein_coding	107434591	107635061	GLIS family zinc finger 1 [Source:MGI Symbol;Acc:MGI:2386723]
ENSMUSG00000034825	96.4874	1.91436	0.221598	8.6389	5.6759e-18	1.62702e-16	Nrip3	7	-1	protein_coding	109758055	109782025	nuclear receptor interacting protein 3 [Source:MGI Symbol;Acc:MGI:1925843]
ENSMUSG00000034853	320.232	-2.24306	0.263228	-8.52136	1.57686e-17	4.40329e-16	Acot11	4	-1	protein_coding	106744555	106804998	acyl-CoA thioesterase 11 [Source:MGI Symbol;Acc:MGI:1913736]
ENSMUSG00000034875	863.359	-0.712271	0.0822362	-8.66129	4.66455e-18	1.34259e-16	Nudt19	7	-1	protein_coding	35547185	35556304	nudix (nucleoside diphosphate linked moiety X)-type motif 19 [Source:MGI Symbol;Acc:MGI:94203]
ENSMUSG00000034981	105.238	-0.585429	0.138138	-4.23799	2.25529e-05	0.000177566	Parm1	5	1	protein_coding	91517615	91626894	prostate androgen-regulated mucin-like protein 1 [Source:MGI Symbol;Acc:MGI:2443349]
ENSMUSG00000035105	218.755	0.924578	0.139948	6.60657	3.93316e-11	6.24946e-10	Egln3	12	-1	protein_coding	54178981	54203860	EGL nine homolog 3 (C. elegans) [Source:MGI Symbol;Acc:MGI:1932288]
ENSMUSG00000035109	33.7291	-0.959888	0.206079	-4.65787	3.19492e-06	2.91402e-05	Shc4	2	-1	protein_coding	125627447	125724148	SHC (Src homology 2 domain containing) family, member 4 [Source:MGI Symbol;Acc:MGI:2655364]
ENSMUSG00000035184	99.1969	-0.644366	0.155135	-4.15357	3.27323e-05	0.000251371	Fam124a	14	1	protein_coding	62555737	62608486	family with sequence similarity 124, member A [Source:MGI Symbol;Acc:MGI:3645930]
ENSMUSG00000035206	1386.8	-1.12421	0.0941977	-11.9346	7.81618e-33	5.01306e-31	Sppl2b	10	1	protein_coding	80855275	80868705	signal peptide peptidase like 2B [Source:MGI Symbol;Acc:MGI:1920468]
ENSMUSG00000035239	329.74	-0.812052	0.096149	-8.44577	3.02043e-17	8.26996e-16	Neu3	7	-1	protein_coding	99811439	99828417	neuraminidase 3 [Source:MGI Symbol;Acc:MGI:1355305]
ENSMUSG00000035397	869.657	-0.614384	0.0658666	-9.32771	1.08184e-20	3.73355e-19	Klf16	10	-1	protein_coding	80567124	80577321	Kruppel-like factor 16 [Source:MGI Symbol;Acc:MGI:2153049]
ENSMUSG00000035441	312.605	-1.04622	0.210232	-4.97649	6.4746e-07	6.49587e-06	Myo1d	11	-1	protein_coding	80482126	80780025	myosin ID [Source:MGI Symbol;Acc:MGI:107728]
ENSMUSG00000035476	1142.64	-0.768215	0.0819449	-9.37477	6.93256e-21	2.41625e-19	Tab3	X	1	protein_coding	85574022	85634469	TGF-beta activated kinase 1/MAP3K7 binding protein 3 [Source:MGI Symbol;Acc:MGI:1913974]
ENSMUSG00000035547	2060.37	0.665066	0.0655153	10.1513	3.26917e-24	1.47649e-22	Capn5	7	-1	protein_coding	98121559	98178274	calpain 5 [Source:MGI Symbol;Acc:MGI:1100859]
ENSMUSG00000035873	256.547	0.874085	0.131745	6.63468	3.25208e-11	5.22639e-10	Pawr	10	1	protein_coding	108332189	108414391	PRKC, apoptosis, WT1, regulator [Source:MGI Symbol;Acc:MGI:2149961]
ENSMUSG00000035900	672.445	-0.733859	0.065409	-11.2195	3.26943e-29	1.80797e-27	Gramd4	15	1	protein_coding	86057695	86137634	GRAM domain containing 4 [Source:MGI Symbol;Acc:MGI:2676308]
ENSMUSG00000035967	2326.55	-0.677566	0.0872565	-7.76522	8.15056e-15	1.83466e-13	Ddx26b	X	1	protein_coding	56454857	56507843	DEAD/H (Asp-Glu-Ala-Asp/His) box polypeptide 26B [Source:MGI Symbol;Acc:MGI:2442593]
ENSMUSG00000036093	5025.71	1.3887	0.0974058	14.2569	4.06277e-46	4.56526e-44	Arl5a	2	-1	protein_coding	52397951	52424901	ADP-ribosylation factor-like 5A [Source:MGI Symbol;Acc:MGI:1922673]
ENSMUSG00000036136	163.119	3.24922	0.181155	17.9361	6.1628e-72	1.46716e-69	Fam110c	12	1	protein_coding	31073968	31079937	family with sequence similarity 110, member C [Source:MGI Symbol;Acc:MGI:1918813]
ENSMUSG00000036181	824.102	-0.656576	0.0758517	-8.65605	4.88375e-18	1.40281e-16	Hist1h1c	13	1	protein_coding	23738807	23740366	histone cluster 1, H1c [Source:MGI Symbol;Acc:MGI:1931526]
ENSMUSG00000036225	72.9174	0.881382	0.142208	6.19782	5.72494e-10	8.08979e-09	Kctd1	18	-1	protein_coding	14968685	15151446	potassium channel tetramerisation domain containing 1 [Source:MGI Symbol;Acc:MGI:1918269]
ENSMUSG00000036352	5338.93	-1.64227	0.186074	-8.8259	1.08584e-18	3.30122e-17	Ubac1	2	-1	protein_coding	25998543	26021747	ubiquitin associated domain containing 1 [Source:MGI Symbol;Acc:MGI:1920995]
ENSMUSG00000036501	625.998	-0.695884	0.0816538	-8.52236	1.56331e-17	4.37414e-16	Fam13b	18	-1	protein_coding	34442352	34506823	family with sequence similarity 13, member B [Source:MGI Symbol;Acc:MGI:2447834]
ENSMUSG00000036586	12.7557	-3.48369	0.448424	-7.76875	7.92652e-15	1.78709e-13	Grifin	5	-1	protein_coding	140563119	140565071	galectin-related inter-fiber protein [Source:MGI Symbol;Acc:MGI:1925248]
ENSMUSG00000036712	686.231	0.942787	0.0676639	13.9334	3.97112e-44	4.16256e-42	Cyld	8	1	protein_coding	88697028	88751945	cylindromatosis (turban tumor syndrome) [Source:MGI Symbol;Acc:MGI:1921506]
ENSMUSG00000036718	1376.84	0.790832	0.0629961	12.5537	3.79581e-36	2.86263e-34	Micall2	5	-1	protein_coding	139706693	139736336	MICAL-like 2 [Source:MGI Symbol;Acc:MGI:2444818]
ENSMUSG00000036814	9.35689	-2.65326	0.4059	-6.53673	6.28797e-11	9.83528e-10	Slc6a20a	9	-1	protein_coding	123636122	123678885	solute carrier family 6 (neurotransmitter transporter), member 20A [Source:MGI Symbol;Acc:MGI:2143217]
ENSMUSG00000036817	1131.12	-0.596728	0.0456417	-13.0742	4.62479e-39	3.96097e-37	Sun1	5	1	protein_coding	139200637	139249840	Sad1 and UNC84 domain containing 1 [Source:MGI Symbol;Acc:MGI:1924303]
ENSMUSG00000036867	320.806	1.05735	0.0857687	12.3279	6.4064e-35	4.59103e-33	Smad6	9	-1	protein_coding	63953076	64022059	SMAD family member 6 [Source:MGI Symbol;Acc:MGI:1336883]
ENSMUSG00000036875	1790.6	-0.638895	0.0441586	-14.4682	1.92449e-47	2.25262e-45	Dna2	10	1	protein_coding	62947026	62974185	DNA replication helicase 2 homolog (yeast) [Source:MGI Symbol;Acc:MGI:2443732]
ENSMUSG00000036882	295.58	-0.672777	0.0752987	-8.93478	4.08001e-19	1.28493e-17	Arhgap33	7	-1	protein_coding	30522226	30534180	Rho GTPase activating protein 33 [Source:MGI Symbol;Acc:MGI:2673998]
ENSMUSG00000036959	693.64	-0.616766	0.0648914	-9.50459	2.00841e-21	7.32731e-20	Bcorl1	X	1	protein_coding	48341358	48408049	BCL6 co-repressor-like 1 [Source:MGI Symbol;Acc:MGI:2443910]
ENSMUSG00000037031	175.393	-0.687139	0.0939839	-7.31124	2.64688e-13	5.16363e-12	Tspan15	10	-1	protein_coding	62185396	62231218	tetraspanin 15 [Source:MGI Symbol;Acc:MGI:1917673]
ENSMUSG00000037126	161.052	-0.63118	0.102127	-6.18033	6.39689e-10	9.02115e-09	Psd	19	-1	protein_coding	46312087	46327156	pleckstrin and Sec7 domain containing [Source:MGI Symbol;Acc:MGI:1920978]
ENSMUSG00000037355	378.918	0.726	0.0833287	8.71249	2.97273e-18	8.71713e-17	Uvssa	5	1	protein_coding	33378551	33419754	UV stimulated scaffold protein A [Source:MGI Symbol;Acc:MGI:1918351]
ENSMUSG00000037411	476.657	4.79916	0.215669	22.2524	1.0683e-109	4.54707e-107	Serpine1	5	-1	protein_coding	137061504	137072272	serine (or cysteine) peptidase inhibitor, clade E, member 1 [Source:MGI Symbol;Acc:MGI:97608]
ENSMUSG00000037415	6106.57	-0.769438	0.128014	-6.01056	1.84887e-09	2.49225e-08	Ranbp10	8	-1	protein_coding	105768308	105827350	RAN binding protein 10 [Source:MGI Symbol;Acc:MGI:1921584]
ENSMUSG00000037419	2090.45	-0.681931	0.0838335	-8.13435	4.14137e-16	1.04247e-14	Endod1	9	-1	protein_coding	14353990	14381242	endonuclease domain containing 1 [Source:MGI Symbol;Acc:MGI:1919196]
ENSMUSG00000037428	14.5481	3.60366	0.408786	8.81552	1.19131e-18	3.60628e-17	Vgf	5	1	protein_coding	137030295	137033351	VGF nerve growth factor inducible [Source:MGI Symbol;Acc:MGI:1343180]
ENSMUSG00000037434	1059.78	1.32408	0.0928813	14.2556	4.13831e-46	4.61323e-44	Slc30a1	1	1	protein_coding	191906767	191913247	solute carrier family 30 (zinc transporter), member 1 [Source:MGI Symbol;Acc:MGI:1345281]
ENSMUSG00000037446	13.7086	1.25271	0.311095	4.0268	5.65417e-05	0.000415152	Tulp1	17	-1	protein_coding	28351515	28365182	tubby like protein 1 [Source:MGI Symbol;Acc:MGI:109571]
ENSMUSG00000037679	4554.79	3.83777	0.134431	28.5483	2.94721e-179	2.58728e-176	Inf2	12	1	protein_coding	112588784	112615556	inverted formin, FH2 and WH2 domain containing [Source:MGI Symbol;Acc:MGI:1917685]
ENSMUSG00000037887	284.174	-1.01378	0.115791	-8.75522	2.03708e-18	6.06205e-17	Dusp8	7	-1	protein_coding	142079490	142095843	dual specificity phosphatase 8 [Source:MGI Symbol;Acc:MGI:106626]
ENSMUSG00000037904	511.454	-0.803101	0.0803117	-9.9998	1.52709e-23	6.48022e-22	Ankrd9	12	-1	protein_coding	110975353	110979040	ankyrin repeat domain 9 [Source:MGI Symbol;Acc:MGI:1921501]
ENSMUSG00000038056	3533.62	0.949108	0.0628518	15.1007	1.60175e-51	2.24983e-49	Mll3	5	-1	protein_coding	25271798	25498783	myeloid/lymphoid or mixed-lineage leukemia 3 [Source:MGI Symbol;Acc:MGI:2444959]
ENSMUSG00000038059	961.623	0.775689	0.0661537	11.7256	9.42684e-32	5.83301e-30	Smim3	18	-1	protein_coding	60474193	60501983	small integral membrane protein 3 [Source:MGI Symbol;Acc:MGI:1917088]
ENSMUSG00000038156	32.1504	0.816649	0.211686	3.85784	0.000114394	0.000783411	Spon1	7	1	protein_coding	113765998	114043370	spondin 1, (f-spondin) extracellular matrix protein [Source:MGI Symbol;Acc:MGI:2385287]
ENSMUSG00000038175	291.179	-0.598308	0.0764514	-7.826	5.03647e-15	1.15592e-13	Mylip	13	1	protein_coding	45389742	45412019	myosin regulatory light chain interacting protein [Source:MGI Symbol;Acc:MGI:2388271]
ENSMUSG00000038212	1284.19	-0.606811	0.0487277	-12.4531	1.3451e-35	9.89177e-34	Hiatl1	13	-1	protein_coding	65064663	65112982	hippocampus abundant transcript-like 1 [Source:MGI Symbol;Acc:MGI:1913881]
ENSMUSG00000038244	295.549	0.707538	0.085239	8.30064	1.03555e-16	2.71876e-15	Mical2	7	1	protein_coding	112225856	112355194	microtubule associated monooxygenase, calponin and LIM domain containing 2 [Source:MGI Symbol;Acc:MGI:2444947]
ENSMUSG00000038366	4167.2	2.03279	0.0878218	23.1467	1.56859e-118	8.16018e-116	Lasp1	11	1	protein_coding	97799000	97838764	LIM and SH3 protein 1 [Source:MGI Symbol;Acc:MGI:109656]
ENSMUSG00000038637	274.213	-1.32475	0.123166	-10.7558	5.56666e-27	2.77267e-25	Lrrc56	7	1	protein_coding	141194157	141210055	leucine rich repeat containing 56 [Source:MGI Symbol;Acc:MGI:1917802]
ENSMUSG00000038695	1885.18	-0.72752	0.0670084	-10.8571	1.84416e-27	9.48832e-26	Josd2	7	1	protein_coding	44467980	44471652	Josephin domain containing 2 [Source:MGI Symbol;Acc:MGI:1913374]
ENSMUSG00000038725	1788.46	-0.993362	0.105129	-9.44899	3.42133e-21	1.22592e-19	Pkhd1l1	15	1	protein_coding	44457553	44597143	polycystic kidney and hepatic disease 1-like 1 [Source:MGI Symbol;Acc:MGI:2183153]
ENSMUSG00000038740	1491.93	0.803784	0.0600303	13.3896	6.95206e-41	6.4668e-39	Mvb12b	2	-1	protein_coding	33729953	33887946	multivesicular body subunit 12B [Source:MGI Symbol;Acc:MGI:1919793]
ENSMUSG00000038836	50.3495	-0.782138	0.174656	-4.47815	7.52912e-06	6.484e-05	Agbl3	6	1	protein_coding	34780432	34859459	ATP/GTP binding protein-like 3 [Source:MGI Symbol;Acc:MGI:1923473]
ENSMUSG00000038861	758.166	0.920798	0.0495943	18.5666	5.98862e-77	1.5871e-74	Pi4kb	3	1	protein_coding	94974731	95006843	phosphatidylinositol 4-kinase, catalytic, beta polypeptide [Source:MGI Symbol;Acc:MGI:1334433]
ENSMUSG00000038990	460.911	0.748318	0.0678765	11.0247	2.90453e-28	1.5631e-26	Cables2	2	-1	protein_coding	180258540	180273496	CDK5 and Abl enzyme substrate 2 [Source:MGI Symbol;Acc:MGI:2182335]
ENSMUSG00000038997	92.1517	-0.611706	0.122785	-4.98191	6.29595e-07	6.32568e-06	Asb17	3	1	protein_coding	153844209	153855082	ankyrin repeat and SOCS box-containing 17 [Source:MGI Symbol;Acc:MGI:1914022]
ENSMUSG00000039021	35.0464	2.75366	0.237081	11.6149	3.46364e-31	2.05276e-29	Ttc16	2	-1	protein_coding	32757026	32775633	tetratricopeptide repeat domain 16 [Source:MGI Symbol;Acc:MGI:2443048]
ENSMUSG00000039158	368.275	-0.631568	0.0717825	-8.79835	1.38844e-18	4.18497e-17	Akna	4	-1	protein_coding	63367125	63403354	AT-hook transcription factor [Source:MGI Symbol;Acc:MGI:2140340]
ENSMUSG00000039195	256	0.656609	0.0928363	7.07276	1.51879e-12	2.76692e-11	1110008....	2	-1	protein_coding	32377097	32381938	RIKEN cDNA 1110008P14 gene [Source:MGI Symbol;Acc:MGI:1920987]
ENSMUSG00000039236	146.39	-0.956587	0.251716	-3.80026	0.000144544	0.000967716	Isg20	7	1	protein_coding	78913424	78920362	interferon-stimulated protein [Source:MGI Symbol;Acc:MGI:1928895]
ENSMUSG00000039253	1004.63	-1.51952	0.183231	-8.29293	1.10495e-16	2.88478e-15	Fn3krp	11	1	protein_coding	121421401	121431288	fructosamine 3 kinase related protein [Source:MGI Symbol;Acc:MGI:2679256]
ENSMUSG00000039316	1050.04	3.13145	0.104663	29.9194	1.101e-196	1.54647e-193	Rftn1	17	-1	protein_coding	49992257	50190674	raftlin lipid raft linker 1 [Source:MGI Symbol;Acc:MGI:1923688]
ENSMUSG00000039452	640.057	-1.5947	0.224468	-7.10437	1.20874e-12	2.21356e-11	Snx22	9	-1	protein_coding	66065176	66069731	sorting nexin 22 [Source:MGI Symbol;Acc:MGI:2685966]
ENSMUSG00000039481	23.5361	1.78712	0.245085	7.29185	3.05726e-13	5.93126e-12	Nrtn	17	-1	protein_coding	56751325	56757530	neurturin [Source:MGI Symbol;Acc:MGI:108417]
ENSMUSG00000039492	41.6006	-0.888265	0.202626	-4.38377	1.16646e-05	9.64904e-05	Ccdc27	4	-1	protein_coding	154026639	154042677	coiled-coil domain containing 27 [Source:MGI Symbol;Acc:MGI:2685881]
ENSMUSG00000039523	967.371	0.73841	0.0760962	9.70363	2.90954e-22	1.13206e-20	Cep104	4	1	protein_coding	153975194	154008732	centrosomal protein 104 [Source:MGI Symbol;Acc:MGI:2687282]
ENSMUSG00000039629	53.6356	0.611529	0.156373	3.91071	9.20241e-05	0.00064339	Strip2	6	1	protein_coding	29917013	29959681	striatin interacting protein 2 [Source:MGI Symbol;Acc:MGI:2444363]
ENSMUSG00000039713	317.254	-0.873819	0.0870623	-10.0367	1.05117e-23	4.52907e-22	Plekhg5	4	1	protein_coding	152072498	152115400	pleckstrin homology domain containing, family G (with RhoGef domain) member 5 [Source:MGI Symbol;Acc:MGI:2652860]
ENSMUSG00000039787	863.106	-0.948539	0.0603597	-15.7148	1.19808e-55	1.86981e-53	Cercam	2	1	protein_coding	29869164	29882840	cerebral endothelial cell adhesion molecule [Source:MGI Symbol;Acc:MGI:2139134]
ENSMUSG00000039798	33.8346	-1.632	0.221807	-7.35773	1.87063e-13	3.6903e-12	2600006....	2	-1	protein_coding	29868726	29869785	RIKEN cDNA 2600006K01 gene [Source:MGI Symbol;Acc:MGI:1917569]
ENSMUSG00000039908	49.0635	0.89204	0.214751	4.15384	3.26947e-05	0.00025122	Slc26a11	11	1	protein_coding	119355557	119381079	solute carrier family 26, member 11 [Source:MGI Symbol;Acc:MGI:2444589]
ENSMUSG00000039910	1021.42	0.61054	0.0531648	11.4839	1.58936e-30	9.11187e-29	Cited2	10	1	protein_coding	17723228	17725673	Cbp/p300-interacting transactivator, with Glu/Asp-rich carboxy-terminal domain, 2 [Source:MGI Symbol;Acc:MGI:1306784]
ENSMUSG00000039942	91.395	0.741055	0.131075	5.65368	1.57048e-08	1.92823e-07	Ptger4	15	-1	protein_coding	5206661	5244187	prostaglandin E receptor 4 (subtype EP4) [Source:MGI Symbol;Acc:MGI:104311]
ENSMUSG00000039954	13.9212	-2.11606	0.383333	-5.52016	3.38683e-08	4.0349e-07	Stk32a	18	1	protein_coding	43207697	43317481	serine/threonine kinase 32A [Source:MGI Symbol;Acc:MGI:2442403]
ENSMUSG00000039956	741.005	1.1731	0.104534	11.2222	3.17259e-29	1.76135e-27	Mrap	16	1	protein_coding	90738324	90749785	melanocortin 2 receptor accessory protein [Source:MGI Symbol;Acc:MGI:1924287]
ENSMUSG00000040007	1655.12	1.46842	0.0799328	18.3707	2.25557e-75	5.76031e-73	Bahd1	2	1	protein_coding	118900377	118924528	bromo adjacent homology domain containing 1 [Source:MGI Symbol;Acc:MGI:2139371]
ENSMUSG00000040016	173.728	1.30265	0.121544	10.7175	8.4242e-27	4.13729e-25	Ptger3	3	1	protein_coding	157566892	157644758	prostaglandin E receptor 3 (subtype EP3) [Source:MGI Symbol;Acc:MGI:97795]
ENSMUSG00000040035	36.3868	0.969584	0.215908	4.49074	7.09768e-06	6.14258e-05	Disp2	2	1	protein_coding	118779719	118811293	dispatched homolog 2 (Drosophila) [Source:MGI Symbol;Acc:MGI:2388733]
ENSMUSG00000040181	285.989	0.812749	0.103094	7.88359	3.18116e-15	7.47201e-14	Fmo1	1	-1	protein_coding	162829561	162866548	flavin containing monooxygenase 1 [Source:MGI Symbol;Acc:MGI:1310002]
ENSMUSG00000040183	159.107	2.43716	0.121018	20.1388	3.37203e-90	1.05252e-87	Ankrd6	4	-1	protein_coding	32804035	32950841	ankyrin repeat domain 6 [Source:MGI Symbol;Acc:MGI:2154278]
ENSMUSG00000040280	33.8126	-0.892198	0.279345	-3.1939	0.00140367	0.00743155	Ndufa4l2	10	1	protein_coding	127514939	127517152	NADH dehydrogenase (ubiquinone) 1 alpha subcomplex, 4-like 2 [Source:MGI Symbol;Acc:MGI:3039567]
ENSMUSG00000040447	1271.87	1.05082	0.0837717	12.5438	4.2969e-36	3.21034e-34	Spns2	11	-1	protein_coding	72451638	72489904	spinster homolog 2 [Source:MGI Symbol;Acc:MGI:2384936]
ENSMUSG00000040466	6810.42	-0.836227	0.0839846	-9.95691	2.35268e-23	9.83503e-22	Blvrb	7	1	protein_coding	27447978	27466144	biliverdin reductase B (flavin reductase (NADPH)) [Source:MGI Symbol;Acc:MGI:2385271]
ENSMUSG00000040616	235.621	0.612336	0.0973097	6.29265	3.12094e-10	4.50531e-09	Tmem51	4	-1	protein_coding	142030992	142084304	transmembrane protein 51 [Source:MGI Symbol;Acc:MGI:2384874]
ENSMUSG00000040618	965.081	-0.670073	0.0736649	-9.09623	9.35238e-20	3.04082e-18	Pck2	14	1	protein_coding	55540266	55550017	phosphoenolpyruvate carboxykinase 2 (mitochondrial) [Source:MGI Symbol;Acc:MGI:1860456]
ENSMUSG00000040631	380.415	-0.896142	0.0868922	-10.3133	6.13848e-25	2.855e-23	Dok4	8	-1	protein_coding	94863828	94876312	docking protein 4 [Source:MGI Symbol;Acc:MGI:2148865]
ENSMUSG00000040657	82.7199	0.798871	0.17887	4.46621	7.96194e-06	6.83161e-05	1700063....	6	1	protein_coding	122391379	122392687	RIKEN cDNA 1700063H04 gene [Source:MGI Symbol;Acc:MGI:1921519]
ENSMUSG00000040794	88.6524	2.88185	0.166058	17.3545	1.8253e-67	3.77031e-65	C1qtnf4	2	1	protein_coding	90885860	90890525	C1q and tumor necrosis factor related protein 4 [Source:MGI Symbol;Acc:MGI:1914695]
ENSMUSG00000040842	1961.94	0.975661	0.0548298	17.7944	7.81489e-71	1.79948e-68	Szrd1	4	-1	protein_coding	141113001	141139775	SUZ RNA binding domain containing 1 [Source:MGI Symbol;Acc:MGI:1098672]
ENSMUSG00000040859	1802.91	-1.3028	0.264308	-4.92909	8.26139e-07	8.18333e-06	Bsdc1	4	1	protein_coding	129461581	129488498	BSD domain containing 1 [Source:MGI Symbol;Acc:MGI:1913466]
ENSMUSG00000040964	190.955	0.891416	0.108775	8.19503	2.50535e-16	6.39821e-15	Arhgef10l	4	-1	protein_coding	140514485	140666012	Rho guanine nucleotide exchange factor (GEF) 10-like [Source:MGI Symbol;Acc:MGI:1920004]
ENSMUSG00000041073	21.4207	-2.26169	0.317482	-7.12382	1.04979e-12	1.94018e-11	Nacad	11	-1	protein_coding	6597823	6606053	NAC alpha domain containing [Source:MGI Symbol;Acc:MGI:3603030]
ENSMUSG00000041237	8831.59	-1.19384	0.0788753	-15.1358	9.40477e-52	1.33434e-49	Pklr	3	1	protein_coding	89136142	89146784	pyruvate kinase liver and red blood cell [Source:MGI Symbol;Acc:MGI:97604]
ENSMUSG00000041372	12.2696	-1.01292	0.304125	-3.33059	0.000866619	0.00483228	B4galnt3	6	-1	protein_coding	120203073	120294559	beta-1,4-N-acetyl-galactosaminyl transferase 3 [Source:MGI Symbol;Acc:MGI:3041155]
ENSMUSG00000041423	34.7983	-2.26954	0.225599	-10.0601	8.29502e-24	3.60718e-22	Paqr6	3	1	protein_coding	88364584	88368541	progestin and adipoQ receptor family member VI [Source:MGI Symbol;Acc:MGI:1916207]
ENSMUSG00000041548	51.574	0.798462	0.165762	4.81692	1.45788e-06	1.40352e-05	Hspb8	5	-1	protein_coding	116408491	116422864	heat shock protein 8 [Source:MGI Symbol;Acc:MGI:2135756]
ENSMUSG00000041570	1385.47	-1.07436	0.0861737	-12.4674	1.12416e-35	8.33564e-34	Camsap2	1	-1	protein_coding	136268123	136346104	calmodulin regulated spectrin-associated protein family, member 2 [Source:MGI Symbol;Acc:MGI:1922434]
ENSMUSG00000041598	1168.48	1.27371	0.0608904	20.9181	3.66195e-97	1.28589e-94	Cdc42ep4	11	-1	protein_coding	113726850	113751881	CDC42 effector protein (Rho GTPase binding) 4 [Source:MGI Symbol;Acc:MGI:1929760]
ENSMUSG00000041617	64.0154	1.65792	0.204754	8.09713	5.62717e-16	1.39645e-14	Ccdc74a	16	1	protein_coding	17646470	17650738	coiled-coil domain containing 74A [Source:MGI Symbol;Acc:MGI:1919565]
ENSMUSG00000041638	4449.04	0.643509	0.0407904	15.776	4.55376e-56	7.18676e-54	Gcn1l1	5	1	protein_coding	115565254	115622656	GCN1 general control of amino-acid synthesis 1-like 1 (yeast) [Source:MGI Symbol;Acc:MGI:2444248]
ENSMUSG00000041679	141.524	-1.28624	0.112729	-11.4099	3.73004e-30	2.12114e-28	Lrrc29	8	-1	protein_coding	105312341	105326276	leucine rich repeat containing 29 [Source:MGI Symbol;Acc:MGI:2443262]
ENSMUSG00000041762	320.46	-0.621551	0.083369	-7.45542	8.95789e-14	1.82616e-12	Gpr155	2	-1	protein_coding	73341506	73386572	G protein-coupled receptor 155 [Source:MGI Symbol;Acc:MGI:1915776]
ENSMUSG00000041945	36.19	-0.941264	0.267613	-3.51727	0.000436019	0.00260388	Mfsd9	1	-1	protein_coding	40772038	40790687	major facilitator superfamily domain containing 9 [Source:MGI Symbol;Acc:MGI:2443548]
ENSMUSG00000042010	70.2648	1.65375	0.193944	8.52695	1.50259e-17	4.21267e-16	Acacb	5	1	protein_coding	114146535	114250761	acetyl-Coenzyme A carboxylase beta [Source:MGI Symbol;Acc:MGI:2140940]
ENSMUSG00000042035	796.945	1.21244	0.0823871	14.7164	5.06223e-49	6.34858e-47	Igsf3	3	1	protein_coding	101377125	101463060	immunoglobulin superfamily, member 3 [Source:MGI Symbol;Acc:MGI:1926158]
ENSMUSG00000042106	574.275	0.703192	0.0637874	11.024	2.92775e-28	1.56959e-26	Fam212a	9	-1	protein_coding	107984227	107985879	family with sequence similarity 212, member A [Source:MGI Symbol;Acc:MGI:1915426]
ENSMUSG00000042121	641.157	-0.740425	0.0808355	-9.15965	5.20649e-20	1.70865e-18	Ssh1	5	-1	protein_coding	113937094	113993894	slingshot homolog 1 (Drosophila) [Source:MGI Symbol;Acc:MGI:2686240]
ENSMUSG00000042207	1161.17	1.1034	0.0629778	17.5205	9.99169e-69	2.12641e-66	Kdm5b	1	1	protein_coding	134560171	134632877	lysine (K)-specific demethylase 5B [Source:MGI Symbol;Acc:MGI:1922855]
ENSMUSG00000042331	3733.98	-0.592116	0.139147	-4.25531	2.0876e-05	0.000165664	Specc1	11	1	protein_coding	61956779	62223013	sperm antigen with calponin homology and coiled-coil domains 1 [Source:MGI Symbol;Acc:MGI:2442356]
ENSMUSG00000042333	1418.33	-0.953404	0.0931007	-10.2406	1.30462e-24	5.96897e-23	Tnfrsf14	4	-1	protein_coding	154922210	154928563	tumor necrosis factor receptor superfamily, member 14 (herpesvirus entry mediator) [Source:MGI Symbol;Acc:MGI:2675303]
ENSMUSG00000042351	3114.62	1.68699	0.0875299	19.2733	8.99857e-83	2.47831e-80	Grap2	15	1	protein_coding	80623505	80650559	GRB2-related adaptor protein 2 [Source:MGI Symbol;Acc:MGI:1333842]
ENSMUSG00000042371	57.5491	6.07229	0.408768	14.8551	6.44732e-50	8.62467e-48	Slc5a10	11	-1	protein_coding	61672781	61720826	solute carrier family 5 (sodium/glucose cotransporter), member 10 [Source:MGI Symbol;Acc:MGI:1926089]
ENSMUSG00000042377	455.344	1.67636	0.100691	16.6486	3.09883e-62	5.88192e-60	Fam83g	11	1	protein_coding	61684091	61709951	family with sequence similarity 83, member G [Source:MGI Symbol;Acc:MGI:1916890]
ENSMUSG00000042406	4081.97	-0.591674	0.0805653	-7.34403	2.07255e-13	4.08289e-12	Atf4	15	1	protein_coding	80255184	80257540	activating transcription factor 4 [Source:MGI Symbol;Acc:MGI:88096]
ENSMUSG00000042498	34.9394	-0.620374	0.195817	-3.16813	0.00153423	0.00803129	D330045....	X	1	protein_coding	139480367	139554582	RIKEN cDNA D330045A20 gene [Source:MGI Symbol;Acc:MGI:2147848]
ENSMUSG00000042599	2144.6	-1.02145	0.144576	-7.06515	1.60437e-12	2.91149e-11	Jhdm1d	6	-1	protein_coding	39136623	39206789	jumonji C domain-containing histone demethylase 1 homolog D (S. cerevisiae) [Source:MGI Symbol;Acc:MGI:2443388]
ENSMUSG00000042605	1261.49	0.591577	0.0595138	9.94016	2.78368e-23	1.15338e-21	Atxn2	5	1	protein_coding	121711337	121816493	ataxin 2 [Source:MGI Symbol;Acc:MGI:1277223]
ENSMUSG00000042655	541.658	8.60985	0.334467	25.742	3.9603e-146	2.78132e-143	Fam159b	13	-1	protein_coding	104845283	104863893	family with sequence similarity 159, member B [Source:MGI Symbol;Acc:MGI:1925053]
ENSMUSG00000042678	59.1029	-2.6095	0.284538	-9.171	4.68633e-20	1.54542e-18	Myo15	11	1	protein_coding	60469339	60528369	myosin XV [Source:MGI Symbol;Acc:MGI:1261811]
ENSMUSG00000042744	6461.16	-0.823694	0.0993114	-8.29405	1.09457e-16	2.863e-15	Gm15800	5	1	protein_coding	121220219	121368577	predicted gene 15800 [Source:MGI Symbol;Acc:MGI:3647820]
ENSMUSG00000042770	3513.47	-0.750265	0.0742747	-10.1012	5.45579e-24	2.40981e-22	Hebp1	6	-1	protein_coding	135137519	135168215	heme binding protein 1 [Source:MGI Symbol;Acc:MGI:1333880]
ENSMUSG00000042851	44.2388	-0.832673	0.179458	-4.63994	3.48508e-06	3.1602e-05	Zc3h6	2	1	protein_coding	128967402	129018563	zinc finger CCCH type containing 6 [Source:MGI Symbol;Acc:MGI:1926001]
ENSMUSG00000043004	3969.64	5.00739	0.107763	46.4667	0	0	Gng2	14	-1	protein_coding	19872559	19977627	guanine nucleotide binding protein (G protein), gamma 2 [Source:MGI Symbol;Acc:MGI:102705]
ENSMUSG00000043557	1132.67	4.05866	0.0989402	41.0213	0	0	Mdga1	17	-1	protein_coding	29827956	29970087	MAM domain containing glycosylphosphatidylinositol anchor 1 [Source:MGI Symbol;Acc:MGI:1922012]
ENSMUSG00000043592	133.642	-2.43527	0.424312	-5.73935	9.50422e-09	1.18769e-07	Unc5cl	17	1	protein_coding	48454901	48539714	unc-5 homolog C (C. elegans)-like [Source:MGI Symbol;Acc:MGI:1923839]
ENSMUSG00000043909	984.863	-0.751544	0.148753	-5.05228	4.36558e-07	4.47584e-06	Trp53bp1	2	-1	protein_coding	121193281	121271407	transformation related protein 53 binding protein 1 [Source:MGI Symbol;Acc:MGI:1351320]
ENSMUSG00000043953	211.469	-0.710692	0.143403	-4.9559	7.1996e-07	7.17711e-06	Ccrl2	9	-1	protein_coding	111054835	111057270	chemokine (C-C motif) receptor-like 2 [Source:MGI Symbol;Acc:MGI:1920904]
ENSMUSG00000044103	10.2754	1.31952	0.335217	3.93633	8.27369e-05	0.0005853	Il1f9	2	1	protein_coding	24186476	24193568	interleukin 1 family, member 9 [Source:MGI Symbol;Acc:MGI:2449929]
ENSMUSG00000044165	32.3588	-0.745526	0.204725	-3.6416	0.000270946	0.0017043	Bcl2l15	3	1	protein_coding	103832601	103854618	BCLl2-like 15 [Source:MGI Symbol;Acc:MGI:2685412]
ENSMUSG00000044197	673.772	-0.767264	0.0721287	-10.6374	1.99538e-26	9.56555e-25	Gpr146	5	1	protein_coding	139377742	139396415	G protein-coupled receptor 146 [Source:MGI Symbol;Acc:MGI:1933113]
ENSMUSG00000044229	318.599	-0.928971	0.0923564	-10.0585	8.42339e-24	3.65169e-22	Nxpe4	9	1	protein_coding	48362041	48400025	neurexophilin and PC-esterase domain family, member 4 [Source:MGI Symbol;Acc:MGI:1924792]
ENSMUSG00000044252	483.835	-0.61251	0.0567559	-10.792	3.75514e-27	1.87704e-25	Osbpl1a	18	-1	protein_coding	12755314	12941841	oxysterol binding protein-like 1A [Source:MGI Symbol;Acc:MGI:1927551]
ENSMUSG00000044352	768.038	-0.974341	0.232283	-4.19463	2.73314e-05	0.000212333	Sowaha	11	-1	protein_coding	53476579	53480195	sosondowah ankyrin repeat domain family member A [Source:MGI Symbol;Acc:MGI:2687280]
ENSMUSG00000044367	262.474	0.692118	0.0743848	9.30457	1.34536e-20	4.60901e-19	Slc16a13	11	-1	protein_coding	70216789	70220994	solute carrier family 16 (monocarboxylic acid transporters), member 13 [Source:MGI Symbol;Acc:MGI:1916559]
ENSMUSG00000044813	297.737	-1.36088	0.116964	-11.6351	2.73289e-31	1.63346e-29	Shb	4	-1	protein_coding	45423278	45532470	src homology 2 domain-containing transforming protein B [Source:MGI Symbol;Acc:MGI:98294]
ENSMUSG00000044827	23.1284	-0.721615	0.218265	-3.30614	0.000945891	0.0052307	Tlr1	5	-1	protein_coding	64924811	64932761	toll-like receptor 1 [Source:MGI Symbol;Acc:MGI:1341295]
ENSMUSG00000044934	825.458	-0.666674	0.0671488	-9.92831	3.13519e-23	1.2952e-21	Zfp367	13	-1	protein_coding	64133022	64153202	zinc finger protein 367 [Source:MGI Symbol;Acc:MGI:2442266]
ENSMUSG00000044968	100.268	-0.705004	0.123163	-5.72417	1.03944e-08	1.29203e-07	Napepld	5	-1	protein_coding	21662901	21701396	N-acyl phosphatidylethanolamine phospholipase D [Source:MGI Symbol;Acc:MGI:2140885]
ENSMUSG00000045180	728.148	2.29336	0.387677	5.91564	3.3058e-09	4.29938e-08	Shroom2	X	-1	protein_coding	152609509	152769465	shroom family member 2 [Source:MGI Symbol;Acc:MGI:107194]
ENSMUSG00000045316	314.169	-0.608748	0.0885507	-6.87457	6.21766e-12	1.06116e-10	Fahd1	17	-1	protein_coding	24848896	24850302	fumarylacetoacetate hydrolase domain containing 1 [Source:MGI Symbol;Acc:MGI:1915886]
ENSMUSG00000045348	34.2835	-0.721165	0.190701	-3.78165	0.000155793	0.00103464	Nyap1	5	-1	protein_coding	137730883	137741607	neuronal tyrosine-phosphorylated phosphoinositide 3-kinase adaptor 1 [Source:MGI Symbol;Acc:MGI:2443880]
ENSMUSG00000045509	98.3836	-1.25385	0.202218	-6.2005	5.62853e-10	7.96156e-09	Gpr150	13	-1	protein_coding	76054867	76056996	G protein-coupled receptor 150 [Source:MGI Symbol;Acc:MGI:2441872]
ENSMUSG00000045629	231.014	-1.79968	0.22808	-7.89057	3.00804e-15	7.08908e-14	Sh3tc2	18	1	protein_coding	61953075	62015715	SH3 domain and tetratricopeptide repeats 2 [Source:MGI Symbol;Acc:MGI:2444417]
ENSMUSG00000045730	486.864	-0.753252	0.193817	-3.8864	0.000101741	0.000705357	Adrb2	18	-1	protein_coding	62177817	62179959	adrenergic receptor, beta 2 [Source:MGI Symbol;Acc:MGI:87938]
ENSMUSG00000045838	30.3554	0.623224	0.197118	3.16168	0.00156862	0.00819256	A430105....	2	-1	protein_coding	118754158	118762661	RIKEN cDNA A430105I19 gene [Source:MGI Symbol;Acc:MGI:2685199]
ENSMUSG00000045932	114.864	-0.594474	0.126491	-4.69974	2.60497e-06	2.41355e-05	Ifit2	19	1	protein_coding	34550694	34576419	interferon-induced protein with tetratricopeptide repeats 2 [Source:MGI Symbol;Acc:MGI:99449]
ENSMUSG00000046085	27.2792	-1.13462	0.242757	-4.6739	2.95536e-06	2.71136e-05	4931422....	2	-1	protein_coding	103966943	104028361	RIKEN cDNA 4931422A03 gene [Source:MGI Symbol;Acc:MGI:1918236]
ENSMUSG00000046275	138.609	6.85065	0.412583	16.6043	6.48733e-62	1.17754e-59	Tusc5	11	1	protein_coding	76679808	76698664	tumor suppressor candidate 5 [Source:MGI Symbol;Acc:MGI:3029307]
ENSMUSG00000046295	763.936	-0.739775	0.0971629	-7.61376	2.66228e-14	5.7178e-13	Ankle1	8	1	protein_coding	71406010	71409904	ankyrin repeat and LEM domain containing 1 [Source:MGI Symbol;Acc:MGI:1918775]
ENSMUSG00000046352	76.4385	-0.871716	0.163472	-5.33251	9.68669e-08	1.07218e-06	Gjb2	14	-1	protein_coding	57098600	57104702	gap junction protein, beta 2 [Source:MGI Symbol;Acc:MGI:95720]
ENSMUSG00000046442	241.744	-0.833247	0.142605	-5.84304	5.12577e-09	6.55707e-08	Ppm1e	11	-1	protein_coding	87226906	87359023	protein phosphatase 1E (PP2C domain containing) [Source:MGI Symbol;Acc:MGI:2444096]
ENSMUSG00000046589	31.3326	2.08375	0.237881	8.75963	1.959e-18	5.85449e-17	Lrrc8e	8	1	protein_coding	4226827	4237470	leucine rich repeat containing 8 family, member E [Source:MGI Symbol;Acc:MGI:1919517]
ENSMUSG00000046634	44.0306	-3.00731	0.235296	-12.7809	2.09529e-37	1.71107e-35	Pkd1l1	11	-1	protein_coding	8826708	8973266	polycystic kidney disease 1 like 1 [Source:MGI Symbol;Acc:MGI:2156538]
ENSMUSG00000046733	12.4711	-1.27572	0.316781	-4.02712	5.64632e-05	0.000414792	Gprc5a	6	1	protein_coding	135065651	135084709	G protein-coupled receptor, family C, group 5, member A [Source:MGI Symbol;Acc:MGI:1891250]
ENSMUSG00000046806	194.917	0.605023	0.0962029	6.28903	3.19464e-10	4.60697e-09	3110062....	6	-1	protein_coding	34871771	34878060	RIKEN cDNA 3110062M04 gene [Source:MGI Symbol;Acc:MGI:1925662]
ENSMUSG00000046808	178.089	-0.838529	0.248541	-3.3738	0.000741379	0.00419895	Atp10d	5	1	processed_transcript	72203329	72298775	ATPase, class V, type 10D [Source:MGI Symbol;Acc:MGI:2450125]
ENSMUSG00000046959	498.094	-1.73124	0.193152	-8.96312	3.15624e-19	1.00073e-17	Slc26a1	5	-1	protein_coding	108669878	108675569	solute carrier family 26 (sulfate transporter), member 1 [Source:MGI Symbol;Acc:MGI:2385894]
ENSMUSG00000047040	57.7843	1.35321	0.180227	7.50838	5.98644e-14	1.24387e-12	Prr15l	11	1	protein_coding	96928104	96937830	proline rich 15-like [Source:MGI Symbol;Acc:MGI:2387599]
ENSMUSG00000047123	369.863	0.648414	0.0712682	9.09823	9.18165e-20	2.99224e-18	Ticam1	17	-1	protein_coding	56269319	56276786	toll-like receptor adaptor molecule 1 [Source:MGI Symbol;Acc:MGI:2147032]
ENSMUSG00000047227	13.6655	1.02004	0.31804	3.20725	0.00134008	0.00711908	Gm527	12	1	protein_coding	64917911	64924591	predicted gene 527 [Source:MGI Symbol;Acc:MGI:2685373]
ENSMUSG00000047388	710.072	0.654029	0.064062	10.2093	1.80129e-24	8.18801e-23	Atmin	8	1	protein_coding	116943393	116960445	ATM interactor [Source:MGI Symbol;Acc:MGI:2682328]
ENSMUSG00000047443	191.139	-2.18687	0.366849	-5.96121	2.50374e-09	3.31457e-08	Fam132b	1	1	protein_coding	91366430	91374216	family with sequence similarity 132, member B [Source:MGI Symbol;Acc:MGI:3606476]
ENSMUSG00000047446	1132.34	-0.775306	0.11382	-6.81166	9.64779e-12	1.62681e-10	Arl4a	12	-1	protein_coding	40005447	40038025	ADP-ribosylation factor-like 4A [Source:MGI Symbol;Acc:MGI:99437]
ENSMUSG00000047547	875.597	-0.638047	0.0590192	-10.8108	3.05884e-27	1.54548e-25	Cltb	13	-1	protein_coding	54592401	54611344	clathrin, light polypeptide (Lcb) [Source:MGI Symbol;Acc:MGI:1921575]
ENSMUSG00000047759	23.3294	1.47987	0.273477	5.41133	6.25576e-08	7.16709e-07	Hs3st3a1	11	1	protein_coding	64435332	64522841	heparan sulfate (glucosamine) 3-O-sulfotransferase 3A1 [Source:MGI Symbol;Acc:MGI:1333861]
ENSMUSG00000047905	12.4788	1.24731	0.315578	3.95245	7.7354e-05	0.00055153	Gm8566	6	1	pseudogene	67205619	67206083	predicted pseudogene 8566 [Source:MGI Symbol;Acc:MGI:3647296]
ENSMUSG00000047977	44.5903	-0.990211	0.204611	-4.83948	1.30176e-06	1.26362e-05	Synb	14	-1	protein_coding	69289344	69294299	syncytin b [Source:MGI Symbol;Acc:MGI:3045308]
ENSMUSG00000047986	16.2091	1.25972	0.307701	4.09397	4.24055e-05	0.000320402	Palm3	8	1	protein_coding	84021471	84030295	paralemmin 3 [Source:MGI Symbol;Acc:MGI:1921587]
ENSMUSG00000048191	142.624	-2.26737	0.188906	-12.0026	3.44293e-33	2.24928e-31	Muc6	7	-1	protein_coding	141633972	141655319	mucin 6, gastric [Source:MGI Symbol;Acc:MGI:2663233]
ENSMUSG00000048385	29.8333	5.2395	0.45259	11.5767	5.4095e-31	3.17915e-29	Scrt1	15	-1	protein_coding	76516203	76522129	scratch homolog 1, zinc finger protein (Drosophila) [Source:MGI Symbol;Acc:MGI:2176606]
ENSMUSG00000048752	124.245	-1.2531	0.212375	-5.9004	3.62624e-09	4.6944e-08	Prss50	9	1	protein_coding	110857967	110864628	protease, serine, 50 [Source:MGI Symbol;Acc:MGI:2447303]
ENSMUSG00000048772	20.967	1.25171	0.257173	4.86719	1.13197e-06	1.10491e-05	Tmem53	4	1	protein_coding	117251951	117268582	transmembrane protein 53 [Source:MGI Symbol;Acc:MGI:1916027]
ENSMUSG00000049037	40.4674	-0.70337	0.209659	-3.35483	0.000794144	0.00447255	Clec4a1	6	1	protein_coding	122921848	122934619	C-type lectin domain family 4, member a1 [Source:MGI Symbol;Acc:MGI:3036291]
ENSMUSG00000049086	35.9137	0.59084	0.176494	3.34766	0.000814981	0.00457158	Bmyc	2	1	protein_coding	25706879	25707717	brain expressed myelocytomatosis oncogene [Source:MGI Symbol;Acc:MGI:88184]
ENSMUSG00000049409	303.535	-0.82096	0.235421	-3.4872	0.000488112	0.00287826	Prokr1	6	-1	protein_coding	87578593	87590701	prokineticin receptor 1 [Source:MGI Symbol;Acc:MGI:1929676]
ENSMUSG00000049516	1504.27	0.828431	0.0541546	15.2975	7.94271e-53	1.15014e-50	Spty2d1	7	-1	protein_coding	46990396	47008411	SPT2, Suppressor of Ty, domain containing 1 (S. cerevisiae) [Source:MGI Symbol;Acc:MGI:2142062]
ENSMUSG00000049565	15.5819	-3.2687	0.410107	-7.97036	1.58209e-15	3.8248e-14	Aknad1	3	1	protein_coding	108739658	108782296	AKNA domain containing 1 [Source:MGI Symbol;Acc:MGI:3584453]
ENSMUSG00000049723	151.494	-0.686835	0.167166	-4.10871	3.97879e-05	0.000302087	Mmp12	9	1	protein_coding	7344381	7369499	matrix metallopeptidase 12 [Source:MGI Symbol;Acc:MGI:97005]
ENSMUSG00000049791	198.278	0.634985	0.0879377	7.22085	5.1663e-13	9.84611e-12	Fzd4	7	1	protein_coding	89404366	89410110	frizzled homolog 4 (Drosophila) [Source:MGI Symbol;Acc:MGI:108520]
ENSMUSG00000049811	20.0463	-0.925544	0.240571	-3.84727	0.000119439	0.000815182	Fam161a	11	1	protein_coding	23007531	23030788	family with sequence similarity 161, member A [Source:MGI Symbol;Acc:MGI:1921123]
ENSMUSG00000050157	504.811	-1.46195	0.202984	-7.20231	5.92022e-13	1.12221e-11	Gm867	10	-1	protein_coding	75937721	75940672	predicted gene 867 [Source:MGI Symbol;Acc:MGI:2685713]
ENSMUSG00000050240	402.584	1.36909	0.0849261	16.121	1.81636e-58	3.00149e-56	Hic2	16	1	protein_coding	17233572	17263430	hypermethylated in cancer 2 [Source:MGI Symbol;Acc:MGI:1929869]
ENSMUSG00000050390	284.246	2.07137	0.215269	9.62226	6.44002e-22	2.41862e-20	C77080	4	-1	protein_coding	129219578	129261404	expressed sequence C77080 [Source:MGI Symbol;Acc:MGI:2140651]
ENSMUSG00000050410	693.462	-0.761031	0.0642357	-11.8475	2.21752e-32	1.40938e-30	Tcf19	17	-1	protein_coding	35512734	35516824	transcription factor 19 [Source:MGI Symbol;Acc:MGI:103180]
ENSMUSG00000050549	782.361	-0.591207	0.110718	-5.33974	9.30812e-08	1.03353e-06	5730508....	3	-1	protein_coding	127869688	127896323	RIKEN cDNA 5730508B09 gene [Source:MGI Symbol;Acc:MGI:1917867]
ENSMUSG00000050668	334.011	0.721923	0.12505	5.77307	7.78391e-09	9.81443e-08	Gpatch11	17	1	protein_coding	78835516	78848299	G patch domain containing 11 [Source:MGI Symbol;Acc:MGI:1858435]
ENSMUSG00000050709	13.1839	1.37778	0.306521	4.4949	6.9604e-06	6.03492e-05	4932442....	10	1	protein_coding	118860826	118863542	RIKEN cDNA 4932442E05 gene [Source:MGI Symbol;Acc:MGI:1921665]
ENSMUSG00000050957	23.2279	3.44613	0.351302	9.80961	1.02368e-22	4.08481e-21	Insl6	19	-1	protein_coding	29321344	29325356	insulin-like 6 [Source:MGI Symbol;Acc:MGI:1351595]
ENSMUSG00000051000	122.497	3.11548	0.187031	16.6575	2.66817e-62	5.13385e-60	Fam160a1	3	-1	protein_coding	85660061	85746266	family with sequence similarity 160, member A1 [Source:MGI Symbol;Acc:MGI:2444746]
ENSMUSG00000051228	11.0529	1.29843	0.339666	3.82266	0.00013202	0.000893236	Nyx	X	1	protein_coding	13466110	13489313	nyctalopin [Source:MGI Symbol;Acc:MGI:2448607]
ENSMUSG00000051331	54.3947	-0.613917	0.152106	-4.03611	5.43459e-05	0.000400915	Cacna1c	6	-1	protein_coding	118592319	118780324	calcium channel, voltage-dependent, L type, alpha 1C subunit [Source:MGI Symbol;Acc:MGI:103013]
ENSMUSG00000051343	42.4955	0.85403	0.167566	5.09669	3.4564e-07	3.58292e-06	Rab11fip5	6	-1	protein_coding	85334963	85374634	RAB11 family interacting protein 5 (class I) [Source:MGI Symbol;Acc:MGI:1098586]
ENSMUSG00000051373	77.4548	1.2944	0.136045	9.5145	1.82583e-21	6.69599e-20	Ppapdc3	2	1	protein_coding	32095528	32110820	phosphatidic acid phosphatase type 2 domain containing 3 [Source:MGI Symbol;Acc:MGI:2445183]
ENSMUSG00000051502	186.279	-0.750354	0.115693	-6.48575	8.82901e-11	1.35978e-09	Ufsp1	5	1	protein_coding	137294669	137295664	UFM1-specific peptidase 1 [Source:MGI Symbol;Acc:MGI:1917490]
ENSMUSG00000051727	536.449	1.58276	0.0761888	20.7741	7.41681e-96	2.42271e-93	Kctd14	7	1	protein_coding	97451334	97459553	potassium channel tetramerisation domain containing 14 [Source:MGI Symbol;Acc:MGI:1289222]
ENSMUSG00000051811	1474.08	1.74707	0.108491	16.1033	2.41908e-58	3.95098e-56	Cox6b2	7	-1	protein_coding	4751792	4753094	cytochrome c oxidase subunit VIb polypeptide 2 [Source:MGI Symbol;Acc:MGI:3044182]
ENSMUSG00000051910	2359.65	-0.590933	0.096477	-6.12512	9.06147e-10	1.25892e-08	Sox6	7	-1	protein_coding	115471344	116038744	SRY-box containing gene 6 [Source:MGI Symbol;Acc:MGI:98368]
ENSMUSG00000052102	546.239	-0.746921	0.0663645	-11.2548	2.19262e-29	1.22213e-27	Gnpda1	18	-1	protein_coding	38327558	38339003	glucosamine-6-phosphate deaminase 1 [Source:MGI Symbol;Acc:MGI:1347054]
ENSMUSG00000052217	22791.3	3.55981	0.184072	19.3392	2.511e-83	7.0539e-81	Hbb-bh1	7	-1	protein_coding	103841636	103843164	hemoglobin Z, beta-like embryonic chain [Source:MGI Symbol;Acc:MGI:96024]
ENSMUSG00000052396	1341.71	2.48228	0.0999836	24.8269	4.59867e-136	2.80839e-133	Mogat2	7	-1	protein_coding	99219084	99238619	monoacylglycerol O-acyltransferase 2 [Source:MGI Symbol;Acc:MGI:2663253]
ENSMUSG00000053218	30.9793	-0.883305	0.199509	-4.42741	9.53734e-06	8.02645e-05	Gm9900	11	-1	protein_coding	58327721	58330339	predicted gene 9900 [Source:MGI Symbol;Acc:MGI:3641618]
ENSMUSG00000053411	78.7391	-0.701369	0.157391	-4.45622	8.3417e-06	7.10968e-05	Cbx7	15	-1	protein_coding	79915807	79971119	chromobox 7 [Source:MGI Symbol;Acc:MGI:1196439]
ENSMUSG00000053617	902.912	1.25998	0.0795292	15.843	1.57074e-56	2.53593e-54	Sh3pxd2a	19	-1	protein_coding	47260174	47464411	SH3 and PX domains 2A [Source:MGI Symbol;Acc:MGI:1298393]
ENSMUSG00000053693	23.2796	0.713716	0.2288	3.11938	0.00181229	0.0092903	Mast1	8	-1	protein_coding	84911903	84937359	microtubule associated serine/threonine kinase 1 [Source:MGI Symbol;Acc:MGI:1861901]
ENSMUSG00000053746	68.3641	1.34074	0.14138	9.48325	2.46486e-21	8.92306e-20	Ptrh1	2	1	protein_coding	32775786	32777597	peptidyl-tRNA hydrolase 1 homolog (S. cerevisiae) [Source:MGI Symbol;Acc:MGI:1913779]
ENSMUSG00000053886	408.827	-0.837276	0.0985696	-8.49427	1.99189e-17	5.50749e-16	Sh2d4a	8	1	protein_coding	68276567	68347694	SH2 domain containing 4A [Source:MGI Symbol;Acc:MGI:1919531]
ENSMUSG00000054065	14.7802	0.917854	0.296118	3.09963	0.00193763	0.00985016	Pkp3	7	1	protein_coding	141078218	141090510	plakophilin 3 [Source:MGI Symbol;Acc:MGI:1891830]
ENSMUSG00000054150	569.885	0.679563	0.0674319	10.0778	6.92836e-24	3.02223e-22	Syne3	12	-1	protein_coding	104929949	105009809	spectrin repeat containing, nuclear envelope family member 3 [Source:MGI Symbol;Acc:MGI:2442408]
ENSMUSG00000054277	465.04	0.592134	0.0819085	7.22921	4.85828e-13	9.28427e-12	Arfgap3	15	-1	protein_coding	83299740	83350247	ADP-ribosylation factor GTPase activating protein 3 [Source:MGI Symbol;Acc:MGI:1913501]
ENSMUSG00000054362	11.5795	2.1501	0.42927	5.00872	5.47927e-07	5.54081e-06	BC055111	4	-1	protein_coding	106590909	106617241	cDNA sequence BC055111 [Source:MGI Symbol;Acc:MGI:2681853]
ENSMUSG00000054484	103.429	0.764818	0.109567	6.98037	2.94405e-12	5.18198e-11	Tmem62	2	1	protein_coding	120977017	121007852	transmembrane protein 62 [Source:MGI Symbol;Acc:MGI:2139461]
ENSMUSG00000054893	155.812	-1.61269	0.155709	-10.3571	3.88604e-25	1.82553e-23	Zfp667	7	1	protein_coding	6286579	6307883	zinc finger protein 667 [Source:MGI Symbol;Acc:MGI:2442757]
ENSMUSG00000055044	444.743	-0.691672	0.0921769	-7.50374	6.20214e-14	1.28488e-12	Pdlim1	19	-1	protein_coding	40221173	40271842	PDZ and LIM domain 1 (elfin) [Source:MGI Symbol;Acc:MGI:1860611]
ENSMUSG00000055319	2081.47	0.658492	0.042296	15.5687	1.18851e-54	1.83448e-52	Sec23ip	7	1	protein_coding	128744870	128784836	Sec23 interacting protein [Source:MGI Symbol;Acc:MGI:2450915]
ENSMUSG00000055385	19.9926	-1.50988	0.310286	-4.86609	1.13828e-06	1.10953e-05	Rnf212	5	-1	protein_coding	108731661	108749448	ring finger protein 212 [Source:MGI Symbol;Acc:MGI:3645767]
ENSMUSG00000055546	125.825	-0.747882	0.154854	-4.82961	1.36802e-06	1.32336e-05	Timd4	11	1	protein_coding	46810800	46844332	T cell immunoglobulin and mucin domain containing 4 [Source:MGI Symbol;Acc:MGI:2445125]
ENSMUSG00000055609	40201.2	3.85813	0.252764	15.2638	1.33306e-52	1.91063e-50	Hba-x	11	1	protein_coding	32276400	32278116	hemoglobin X, alpha-like embryonic chain in Hba complex [Source:MGI Symbol;Acc:MGI:96019]
ENSMUSG00000055652	427.154	-0.641656	0.0818853	-7.83604	4.64978e-15	1.06892e-13	Klhl25	7	1	protein_coding	75848338	75874130	kelch-like 25 [Source:MGI Symbol;Acc:MGI:2668031]
ENSMUSG00000055692	57.3701	0.891864	0.206779	4.31312	1.60968e-05	0.000130164	Tmem191c	16	1	protein_coding	17276300	17283229	transmembrane protein 191C [Source:MGI Symbol;Acc:MGI:107238]
ENSMUSG00000055707	404.919	0.810168	0.0801986	10.102	5.41175e-24	2.3979e-22	Klhl26	8	-1	protein_coding	70450228	70476943	kelch-like 26 [Source:MGI Symbol;Acc:MGI:2443079]
ENSMUSG00000055723	762.117	2.04925	0.0753436	27.1987	6.72829e-163	4.97398e-160	Rras2	7	-1	protein_coding	114046785	114117781	related RAS viral (r-ras) oncogene homolog 2 [Source:MGI Symbol;Acc:MGI:1914172]
ENSMUSG00000055833	31.135	0.86441	0.201349	4.2931	1.762e-05	0.000141504	1700034....	1	-1	protein_coding	191890233	191907527	RIKEN cDNA 1700034H15 gene [Source:MGI Symbol;Acc:MGI:1921515]
ENSMUSG00000055862	77.9803	0.930943	0.138246	6.73397	1.65098e-11	2.7411e-10	Izumo4	10	1	protein_coding	80702693	80705382	IZUMO family member 4 [Source:MGI Symbol;Acc:MGI:1918814]
ENSMUSG00000056185	91.1315	-0.939294	0.126794	-7.40802	1.28203e-13	2.56882e-12	Snx32	19	-1	protein_coding	5495278	5510489	sorting nexin 32 [Source:MGI Symbol;Acc:MGI:2444704]
ENSMUSG00000056367	17.253	2.40507	0.353184	6.80967	9.78235e-12	1.64554e-10	Actr3b	5	1	protein_coding	25759997	25850342	ARP3 actin-related protein 3B [Source:MGI Symbol;Acc:MGI:2661120]
ENSMUSG00000056671	142.878	-0.60925	0.106358	-5.72832	1.01432e-08	1.26416e-07	Prelid2	18	-1	protein_coding	41875696	41951194	PRELI domain containing 2 [Source:MGI Symbol;Acc:MGI:1924869]
ENSMUSG00000056938	366.69	-1.75709	0.31336	-5.60726	2.05551e-08	2.49539e-07	Acbd4	11	1	protein_coding	103101682	103112200	acyl-Coenzyme A binding domain containing 4 [Source:MGI Symbol;Acc:MGI:1914381]
ENSMUSG00000057058	30.2456	3.5716	0.305173	11.7035	1.22291e-31	7.46825e-30	Skap1	11	1	protein_coding	96464593	96759130	src family associated phosphoprotein 1 [Source:MGI Symbol;Acc:MGI:1925723]
ENSMUSG00000057137	115.001	0.698301	0.116948	5.97102	2.35779e-09	3.13317e-08	Tmem140	6	1	protein_coding	34863146	34874946	transmembrane protein 140 [Source:MGI Symbol;Acc:MGI:1915737]
ENSMUSG00000057193	1716.04	1.86186	0.0881343	21.1252	4.6658e-99	1.72463e-96	Slc44a2	9	1	protein_coding	21337828	21355025	solute carrier family 44, member 2 [Source:MGI Symbol;Acc:MGI:1915932]
ENSMUSG00000057265	15.6798	-0.869287	0.271209	-3.20523	0.00134956	0.00716402	Ccdc176	12	1	protein_coding	84409071	84433780	coiled-coil domain containing 176 [Source:MGI Symbol;Acc:MGI:1920123]
ENSMUSG00000057440	390.895	0.777852	0.0846797	9.18581	4.08453e-20	1.36274e-18	Mpp7	18	-1	protein_coding	7347962	7626863	membrane protein, palmitoylated 7 (MAGUK p55 subfamily member 7) [Source:MGI Symbol;Acc:MGI:1922989]
ENSMUSG00000057948	1406.66	-0.842089	0.0773468	-10.8872	1.32679e-27	6.87681e-26	Unc13d	11	-1	protein_coding	116062095	116077961	unc-13 homolog D (C. elegans) [Source:MGI Symbol;Acc:MGI:1917700]
ENSMUSG00000058183	71.8174	-1.04447	0.250998	-4.16126	3.16494e-05	0.000243588	Mmel1	4	1	protein_coding	154869585	154895528	membrane metallo-endopeptidase-like 1 [Source:MGI Symbol;Acc:MGI:1351603]
ENSMUSG00000058486	752.397	-0.617118	0.0932593	-6.61723	3.65997e-11	5.8618e-10	Wdr91	6	-1	protein_coding	34880426	34910876	WD repeat domain 91 [Source:MGI Symbol;Acc:MGI:2141558]
ENSMUSG00000058587	1594.23	0.933719	0.0476883	19.5796	2.30749e-85	6.89596e-83	Tmod3	9	-1	protein_coding	75497796	75559657	tropomodulin 3 [Source:MGI Symbol;Acc:MGI:1355315]
ENSMUSG00000058624	129.677	0.664306	0.153238	4.33511	1.45684e-05	0.000118763	Gda	19	-1	protein_coding	21391307	21473445	guanine deaminase [Source:MGI Symbol;Acc:MGI:95678]
ENSMUSG00000058755	60.0417	0.81676	0.154672	5.2806	1.28759e-07	1.40197e-06	Osm	11	1	protein_coding	4236420	4241026	oncostatin M [Source:MGI Symbol;Acc:MGI:104749]
ENSMUSG00000059022	68.9122	0.880788	0.144936	6.07708	1.2239e-09	1.6788e-08	Kcp	6	-1	protein_coding	29473162	29507952	kielin/chordin-like protein [Source:MGI Symbol;Acc:MGI:2141640]
ENSMUSG00000059288	646.97	-0.617106	0.0527777	-11.6926	1.39136e-31	8.42371e-30	Cdyl	13	1	protein_coding	35659862	35874064	chromodomain protein, Y chromosome-like [Source:MGI Symbol;Acc:MGI:1339956]
ENSMUSG00000059479	40.5713	1.53126	0.205023	7.46871	8.09852e-14	1.66061e-12	B3gnt8	7	1	protein_coding	25627624	25629490	UDP-GlcNAc:betaGal beta-1,3-N-acetylglucosaminyltransferase 8 [Source:MGI Symbol;Acc:MGI:2385269]
ENSMUSG00000059554	85.3525	0.647275	0.123222	5.25293	1.49695e-07	1.60996e-06	Ccdc28a	10	-1	protein_coding	18213676	18234998	coiled-coil domain containing 28A [Source:MGI Symbol;Acc:MGI:2443508]
ENSMUSG00000059842	166.642	-1.11185	0.137417	-8.09108	5.914e-16	1.46505e-14	Zfp341	2	1	protein_coding	154613297	154646821	zinc finger protein 341 [Source:MGI Symbol;Acc:MGI:2682937]
ENSMUSG00000059851	2814.7	0.621561	0.0714002	8.7053	3.16722e-18	9.2488e-17	Suv420h2	7	1	protein_coding	4740115	4747514	suppressor of variegation 4-20 homolog 2 (Drosophila) [Source:MGI Symbol;Acc:MGI:2385262]
ENSMUSG00000059854	320.156	5.16342	0.234401	22.0281	1.54972e-107	6.40218e-105	Hydin	8	1	protein_coding	110266977	110610253	HYDIN, axonemal central pair apparatus protein [Source:MGI Symbol;Acc:MGI:2389007]
ENSMUSG00000059970	71.5551	0.591468	0.142607	4.14753	3.36079e-05	0.000257673	Hspa2	12	1	protein_coding	76404176	76406934	heat shock protein 2 [Source:MGI Symbol;Acc:MGI:96243]
ENSMUSG00000060962	42.6181	5.78417	0.434332	13.3174	1.83359e-40	1.67237e-38	Dmkn	7	1	protein_coding	30763756	30781066	dermokine [Source:MGI Symbol;Acc:MGI:1920962]
ENSMUSG00000061411	1115.32	1.07079	0.0646705	16.5576	1.41119e-61	2.50905e-59	8430427....	2	-1	protein_coding	153407462	153529971	RIKEN cDNA 8430427H17 gene [Source:MGI Symbol;Acc:MGI:1918765]
ENSMUSG00000061414	55.6902	2.78959	0.207015	13.4753	2.18635e-41	2.04729e-39	Efcab4b	6	1	protein_coding	127577975	127629938	EF-hand calcium binding domain 4B [Source:MGI Symbol;Acc:MGI:2685919]
ENSMUSG00000061436	5477.3	0.680419	0.0906078	7.5095	5.93529e-14	1.2369e-12	Hipk2	6	-1	protein_coding	38694390	38876165	homeodomain interacting protein kinase 2 [Source:MGI Symbol;Acc:MGI:1314872]
ENSMUSG00000061981	1216.29	1.47629	0.0708618	20.8334	2.15508e-96	7.20719e-94	Flot2	11	1	protein_coding	78037931	78060434	flotillin 2 [Source:MGI Symbol;Acc:MGI:103309]
ENSMUSG00000062127	396.044	2.26832	0.124254	18.2556	1.86726e-74	4.52198e-72	Cttnbp2nl	3	-1	protein_coding	105001915	105053146	CTTNBP2 N-terminal like [Source:MGI Symbol;Acc:MGI:1933137]
ENSMUSG00000062590	224.919	-0.587309	0.0826044	-7.10989	1.16131e-12	2.12947e-11	Armc9	1	1	protein_coding	86154780	86278284	armadillo repeat containing 9 [Source:MGI Symbol;Acc:MGI:1926045]
ENSMUSG00000062593	31.6154	0.750873	0.236129	3.17992	0.00147314	0.00774391	Lilrb4	10	1	protein_coding	51480640	51496613	leukocyte immunoglobulin-like receptor, subfamily B, member 4 [Source:MGI Symbol;Acc:MGI:102701]
ENSMUSG00000063253	778.823	-0.616328	0.0551298	-11.1796	5.13268e-29	2.8052e-27	Scoc	8	-1	protein_coding	83434493	83458391	short coiled-coil protein [Source:MGI Symbol;Acc:MGI:1927654]
ENSMUSG00000063652	47.0744	-1.25469	0.172325	-7.28095	3.31468e-13	6.41295e-12	Slc22a21	11	-1	protein_coding	53949965	53980332	solute carrier family 22 (organic cation transporter), member 21 [Source:MGI Symbol;Acc:MGI:1929481]
ENSMUSG00000063931	601.187	-0.882769	0.106894	-8.25838	1.47667e-16	3.8268e-15	Pepd	7	1	protein_coding	34912379	35044710	peptidase D [Source:MGI Symbol;Acc:MGI:97542]
ENSMUSG00000064181	501.179	1.40164	0.0791866	17.7004	4.16179e-70	8.9933e-68	Rab3ip	10	-1	protein_coding	116905784	116950380	RAB3A interacting protein [Source:MGI Symbol;Acc:MGI:105933]
ENSMUSG00000066278	966.417	1.03861	0.058371	17.7932	7.97449e-71	1.80661e-68	Vps37b	5	-1	protein_coding	124004641	124032260	vacuolar protein sorting 37B (yeast) [Source:MGI Symbol;Acc:MGI:1916724]
ENSMUSG00000066687	94.1018	1.13635	0.154062	7.37596	1.63161e-13	3.22783e-12	Zbtb16	9	-1	protein_coding	48654311	48835945	zinc finger and BTB domain containing 16 [Source:MGI Symbol;Acc:MGI:103222]
ENSMUSG00000066800	512.891	-1.03258	0.118895	-8.68483	3.79324e-18	1.1031e-16	Rnasel	1	1	protein_coding	153749426	153764221	ribonuclease L (2', 5'-oligoisoadenylate synthetase-dependent) [Source:MGI Symbol;Acc:MGI:1098272]
ENSMUSG00000066877	876.886	1.36941	0.0995869	13.7509	5.02898e-43	5.0818e-41	Nck2	1	1	protein_coding	43445751	43570515	non-catalytic region of tyrosine kinase adaptor protein 2 [Source:MGI Symbol;Acc:MGI:1306821]
ENSMUSG00000067058	28.7118	-1.47582	0.369933	-3.98942	6.62351e-05	0.000481541	Rps15a-ps5	5	-1	pseudogene	105797287	105797743	ribosomal protein S15A, pseudogene 5 [Source:MGI Symbol;Acc:MGI:3642245]
ENSMUSG00000067199	45.8736	0.62276	0.187313	3.3247	0.00088512	0.00492958	Frat1	19	1	pseudogene	41830168	41830809	frequently rearranged in advanced T cell lymphomas [Source:MGI Symbol;Acc:MGI:109450]
ENSMUSG00000067389	14.1948	-1.24045	0.326955	-3.79395	0.000148267	0.000989338	Gm17080	17	1	antisense	45586120	45588377	predicted gene 17080 [Source:MGI Symbol;Acc:MGI:4937907]
ENSMUSG00000067714	67.836	1.68698	0.158227	10.6617	1.53716e-26	7.44518e-25	Lpar5	6	1	protein_coding	125067920	125082472	lysophosphatidic acid receptor 5 [Source:MGI Symbol;Acc:MGI:2685918]
ENSMUSG00000068323	117.602	-2.51298	0.556338	-4.51701	6.27197e-06	5.46972e-05	Slc4a5	6	1	protein_coding	83219828	83304945	solute carrier family 4, sodium bicarbonate cotransporter, member 5 [Source:MGI Symbol;Acc:MGI:2443220]
ENSMUSG00000068417	33.6957	-1.01305	0.223485	-4.53295	5.81661e-06	5.09988e-05	Pnp2	14	1	protein_coding	50955992	50964749	purine-nucleoside phosphorylase 2 [Source:MGI Symbol;Acc:MGI:3712328]
ENSMUSG00000068876	844.257	1.49197	0.0915531	16.2962	1.05053e-59	1.7778e-57	Cgn	3	-1	protein_coding	94760069	94786492	cingulin [Source:MGI Symbol;Acc:MGI:1927237]
ENSMUSG00000070056	248.971	-0.892228	0.137165	-6.50479	7.78039e-11	1.20755e-09	Mfhas1	8	1	protein_coding	35587798	35679449	malignant fibrous histiocytoma amplified sequence 1 [Source:MGI Symbol;Acc:MGI:1098644]
ENSMUSG00000070065	20.9663	-0.787003	0.249199	-3.15813	0.00158786	0.00828495	Mir451	11	1	miRNA	78073170	78073241	microRNA 451 [Source:MGI Symbol;Acc:MGI:3619412]
ENSMUSG00000070315	131.925	-1.3297	0.156476	-8.49775	1.93295e-17	5.35508e-16	4930581....	9	1	processed_transcript	35116728	35130922	RIKEN cDNA 4930581F22 gene [Source:MGI Symbol;Acc:MGI:1926184]
ENSMUSG00000070327	1794.79	0.654528	0.166659	3.92736	8.58845e-05	0.000604375	Rnf213	11	1	protein_coding	119393100	119487418	ring finger protein 213 [Source:MGI Symbol;Acc:MGI:1289196]
ENSMUSG00000070476	130.053	0.774765	0.110064	7.0392	1.93346e-12	3.48171e-11	Fam217b	2	1	protein_coding	178414524	178424428	family with sequence similarity 217, member B [Source:MGI Symbol;Acc:MGI:1918782]
ENSMUSG00000070699	571.038	0.992515	0.0757263	13.1066	3.01828e-39	2.6009e-37	Sars2	7	1	protein_coding	28741968	28753879	seryl-aminoacyl-tRNA synthetase 2 [Source:MGI Symbol;Acc:MGI:1919234]
ENSMUSG00000070732	55.5476	-0.911455	0.27331	-3.33487	0.000853379	0.00476982	Rbm44	1	1	protein_coding	91145103	91170795	RNA binding motif protein 44 [Source:MGI Symbol;Acc:MGI:2685663]
ENSMUSG00000070803	3274.38	0.688471	0.0647132	10.6388	1.96639e-26	9.45889e-25	Cited4	4	1	protein_coding	120666563	120667820	Cbp/p300-interacting transactivator, with Glu/Asp-rich carboxy-terminal domain, 4 [Source:MGI Symbol;Acc:MGI:1861694]
ENSMUSG00000071226	933.997	-0.855145	0.0478065	-17.8876	1.47195e-71	3.44583e-69	Cecr2	6	1	protein_coding	120666369	120771190	cat eye syndrome chromosome region, candidate 2 [Source:MGI Symbol;Acc:MGI:1923799]
ENSMUSG00000071369	230.719	0.940836	0.0978797	9.61217	7.10336e-22	2.66063e-20	Map3k5	10	1	protein_coding	19934472	20142753	mitogen-activated protein kinase kinase kinase 5 [Source:MGI Symbol;Acc:MGI:1346876]
ENSMUSG00000071552	11.8935	2.49448	0.363003	6.87179	6.33992e-12	1.0794e-10	Tigit	16	-1	protein_coding	43648861	43664184	T cell immunoreceptor with Ig and ITIM domains [Source:MGI Symbol;Acc:MGI:3642260]
ENSMUSG00000071636	43.3683	3.20632	0.235139	13.6358	2.45125e-42	2.44186e-40	Rimbp3	16	1	protein_coding	17208135	17213971	RIMS binding protein 3 [Source:MGI Symbol;Acc:MGI:2685449]
ENSMUSG00000072437	43.0021	-1.26137	0.190364	-6.6261	3.4467e-11	5.53283e-10	Nanos1	19	1	protein_coding	60755987	60759913	nanos homolog 1 (Drosophila) [Source:MGI Symbol;Acc:MGI:2669254]
ENSMUSG00000072855	357.502	-1.46266	0.103697	-14.1051	3.53344e-45	3.81775e-43	Gm10430	5	1	protein_coding	76656512	76658355	predicted gene 10430 [Source:MGI Symbol;Acc:MGI:3711274]
ENSMUSG00000072934	55.7664	6.17752	0.421991	14.639	1.58427e-48	1.95198e-46	Gm15070	X	1	antisense	144456581	144477066	predicted gene 15070 [Source:MGI Symbol;Acc:MGI:3641805]
ENSMUSG00000073418	26.9192	0.743162	0.229286	3.2412	0.00119028	0.00641792	C4b	17	-1	protein_coding	34728380	34743882	complement component 4B (Chido blood group) [Source:MGI Symbol;Acc:MGI:88228]
ENSMUSG00000073433	172.751	-1.74698	0.264285	-6.61022	3.83759e-11	6.1045e-10	Arhgdig	17	-1	protein_coding	26196226	26207786	Rho GDP dissociation inhibitor (GDI) gamma [Source:MGI Symbol;Acc:MGI:108430]
ENSMUSG00000073538	34.5471	0.778698	0.244975	3.17869	0.00147945	0.00777416	E330020....	1	-1	protein_coding	153404827	153408429	Riken cDNA E330020D12 gene [Source:MGI Symbol;Acc:MGI:3761270]
ENSMUSG00000073940	59229.3	-1.23558	0.261158	-4.73116	2.23246e-06	2.09053e-05	Hbb-b2	7	-1	protein_coding	103812524	103813996	hemoglobin, beta adult minor chain [Source:MGI Symbol;Acc:MGI:96022]
ENSMUSG00000074006	53.4606	0.843618	0.215879	3.90782	9.31305e-05	0.000650802	Omp	7	-1	protein_coding	98143360	98145502	olfactory marker protein [Source:MGI Symbol;Acc:MGI:97436]
ENSMUSG00000074093	581.099	-0.850753	0.0636124	-13.374	8.57889e-41	7.92757e-39	Svip	7	-1	protein_coding	51997165	52006018	small VCP/p97-interacting protein [Source:MGI Symbol;Acc:MGI:1922994]
ENSMUSG00000074203	40.6526	-1.17191	0.182374	-6.42587	1.31121e-10	1.98891e-09	G430095....	8	1	protein_coding	84723007	84726844	RIKEN cDNA G430095P16 gene [Source:MGI Symbol;Acc:MGI:3588227]
ENSMUSG00000074361	31.7157	-1.64323	0.234158	-7.01763	2.25666e-12	4.01228e-11	C5ar2	7	-1	protein_coding	16234585	16244154	complement component 5a receptor 2 [Source:MGI Symbol;Acc:MGI:2442013]
ENSMUSG00000074577	516.166	2.06242	0.200797	10.2712	9.50238e-25	4.40496e-23	Fam65c	2	-1	protein_coding	167980164	168010618	family with sequence similarity 65, member C [Source:MGI Symbol;Acc:MGI:1916803]
ENSMUSG00000074793	538.762	1.42421	0.116487	12.2263	2.24829e-34	1.57112e-32	Hspa12b	2	1	protein_coding	131127280	131146321	heat shock protein 12B [Source:MGI Symbol;Acc:MGI:1919880]
ENSMUSG00000074916	161.318	0.674898	0.0926132	7.28727	3.16296e-13	6.12786e-12	Chst14	2	1	protein_coding	118926497	118928585	carbohydrate (N-acetylgalactosamine 4-0) sulfotransferase 14 [Source:MGI Symbol;Acc:MGI:1919386]
ENSMUSG00000075184	146.925	-1.2887	0.27626	-4.66481	3.089e-06	2.82291e-05	F930017....	10	1	protein_coding	43593427	43630916	RIKEN cDNA F930017D23 gene [Source:MGI Symbol;Acc:MGI:3822538]
ENSMUSG00000075511	61.3447	-1.06817	0.151052	-7.07154	1.53227e-12	2.78424e-11	1700001....	15	-1	lincRNA	83357526	83367282	RIKEN cDNA 1700001L05 gene [Source:MGI Symbol;Acc:MGI:1916541]
ENSMUSG00000075590	29.7512	-0.827753	0.202361	-4.09048	4.30485e-05	0.000324737	Nrbp2	15	-1	protein_coding	76085595	76090013	nuclear receptor binding protein 2 [Source:MGI Symbol;Acc:MGI:2385017]
ENSMUSG00000075704	1908.5	-0.594226	0.0756934	-7.85044	4.14591e-15	9.60948e-14	Txnrd2	16	1	protein_coding	18426417	18479073	thioredoxin reductase 2 [Source:MGI Symbol;Acc:MGI:1347023]
ENSMUSG00000076441	7587.68	4.06873	0.12887	31.5724	8.82307e-219	2.06548e-215	Ass1	2	1	protein_coding	31470207	31520672	argininosuccinate synthetase 1 [Source:MGI Symbol;Acc:MGI:88090]
ENSMUSG00000078137	12.6037	2.13935	0.350243	6.1082	1.00763e-09	1.39029e-08	Ankrd63	2	-1	protein_coding	118699103	118703963	ankyrin repeat domain 63 [Source:MGI Symbol;Acc:MGI:2686183]
ENSMUSG00000078484	242.184	-0.84449	0.0894011	-9.44608	3.51767e-21	1.25723e-19	Klhl17	4	-1	protein_coding	156229044	156234857	kelch-like 17 [Source:MGI Symbol;Acc:MGI:2678948]
ENSMUSG00000078485	32.7865	-0.833356	0.201465	-4.13647	3.52687e-05	0.000269524	Plekhn1	4	-1	protein_coding	156221456	156228542	pleckstrin homology domain containing, family N member 1 [Source:MGI Symbol;Acc:MGI:2387630]
ENSMUSG00000078621	13.1414	2.48131	0.3556	6.97781	2.99812e-12	5.26396e-11	Hbb-bh2	7	-1	protein_coding	103839145	103840427	hemoglobin beta, bh2 [Source:MGI Symbol;Acc:MGI:96025]
ENSMUSG00000078923	45.3314	-0.988688	0.171439	-5.76701	8.0692e-09	1.01559e-07	Ube2v1	2	-1	protein_coding	167607638	167632095	ubiquitin-conjugating enzyme E2 variant 1 [Source:MGI Symbol;Acc:MGI:1913839]
ENSMUSG00000078945	286.954	1.16883	0.0808324	14.4599	2.17033e-47	2.51938e-45	Naip2	13	-1	protein_coding	100144063	100202092	NLR family, apoptosis inhibitory protein 2 [Source:MGI Symbol;Acc:MGI:1298226]
ENSMUSG00000079022	78.1288	-0.669848	0.168329	-3.9794	6.90888e-05	0.000499188	Col22a1	15	-1	protein_coding	71795795	72034227	collagen, type XXII, alpha 1 [Source:MGI Symbol;Acc:MGI:1916950]
ENSMUSG00000079323	9.29373	1.12706	0.328665	3.42919	0.000605388	0.0034764	Gm20661	9	1	protein_coding	107983058	107995007	predicted gene 20661 [Source:MGI Symbol;Acc:MGI:5313108]
ENSMUSG00000079418	228.736	-1.02551	0.135499	-7.5684	3.77853e-14	8.02923e-13	Atg4a	X	1	protein_coding	140956907	141164270	autophagy related 4A, cysteine peptidase [Source:MGI Symbol;Acc:MGI:2147903]
ENSMUSG00000079662	97.6851	0.813547	0.13829	5.88291	4.03116e-09	5.20899e-08	Ntn3	17	-1	protein_coding	24203848	24209387	netrin 3 [Source:MGI Symbol;Acc:MGI:1341188]
ENSMUSG00000080950	27.1117	-1.21819	0.253226	-4.81069	1.5041e-06	1.44702e-05	Gm7278	1	-1	pseudogene	152729159	152730559	predicted gene 7278 [Source:MGI Symbol;Acc:MGI:3645261]
ENSMUSG00000081534	2021.6	-0.788281	0.140247	-5.62067	1.90214e-08	2.31722e-07	Slc48a1	15	1	protein_coding	97784355	97792692	solute carrier family 48 (heme transporter), member 1 [Source:MGI Symbol;Acc:MGI:1914989]
ENSMUSG00000081965	17.0691	-1.91652	0.293674	-6.52601	6.7543e-11	1.05295e-09	Gm11620	11	-1	pseudogene	105164776	105166620	predicted gene 11620 [Source:MGI Symbol;Acc:MGI:3650770]
ENSMUSG00000081984	152.764	0.991968	0.0992716	9.99247	1.64437e-23	6.936e-22	Dnajb3	1	-1	protein_coding	88204732	88205748	DnaJ (Hsp40) homolog, subfamily B, member 3 [Source:MGI Symbol;Acc:MGI:1306822]
ENSMUSG00000082286	36.8605	1.53629	0.222255	6.91231	4.76833e-12	8.21791e-11	Pisd-ps1	11	1	pseudogene	3125904	3131004	phosphatidylserine decarboxylase, pseudogene 1 [Source:MGI Symbol;Acc:MGI:3842428]
ENSMUSG00000082305	28.7403	3.97188	0.346538	11.4616	2.05714e-30	1.17458e-28	Gm2420	5	1	pseudogene	32724352	32736194	predicted gene 2420 [Source:MGI Symbol;Acc:MGI:3780587]
ENSMUSG00000083012	85.8773	-1.11958	0.208017	-5.38213	7.36079e-08	8.33116e-07	Fam220a	5	1	protein_coding	143548708	143564531	family with sequence similarity 220, member A [Source:MGI Symbol;Acc:MGI:1914488]
ENSMUSG00000083282	199.946	-1.16848	0.13615	-8.58234	9.29626e-18	2.64322e-16	Ctsf	19	1	protein_coding	4855129	4860912	cathepsin F [Source:MGI Symbol;Acc:MGI:1861434]
ENSMUSG00000084756	117.933	-2.3282	0.558144	-4.17133	3.02824e-05	0.000233322	Gm13881	2	1	lincRNA	103912024	103918960	predicted gene 13881 [Source:MGI Symbol;Acc:MGI:3649536]
ENSMUSG00000084817	24.215	0.724333	0.222674	3.25289	0.00114239	0.0061906	Gm5526	1	-1	pseudogene	45857332	45857787	predicted pseudogene 5526 [Source:MGI Symbol;Acc:MGI:3643066]
ENSMUSG00000084846	22.7379	0.854223	0.235529	3.62682	0.000286929	0.0017936	A730011....	3	-1	processed_transcript	94994410	94997350	RIKEN cDNA A730011C13 gene [Source:MGI Symbol;Acc:MGI:2442973]
ENSMUSG00000084862	50.5058	-0.76749	0.158273	-4.84916	1.23983e-06	1.20517e-05	Gm16278	17	1	processed_transcript	25919089	25935745	predicted gene 16278 [Source:MGI Symbol;Acc:MGI:3826602]
ENSMUSG00000084866	56.8227	-0.882813	0.16913	-5.21973	1.79185e-07	1.90525e-06	A930006....	16	1	processed_transcript	91465104	91470121	RIKEN cDNA A930006K02 gene [Source:MGI Symbol;Acc:MGI:1925683]
ENSMUSG00000084973	52.1656	1.16837	0.160855	7.26351	3.77185e-13	7.25745e-12	Gm13848	6	-1	lincRNA	31662220	31666131	predicted gene 13848 [Source:MGI Symbol;Acc:MGI:3651996]
ENSMUSG00000085006	103.618	3.35801	0.22359	15.0186	5.54966e-51	7.71787e-49	BC021767	3	-1	pseudogene	94661830	94670696	cDNA sequence BC021767 [Source:MGI Symbol;Acc:MGI:3615512]
ENSMUSG00000085095	11.6116	4.06813	0.475714	8.55164	1.21354e-17	3.42275e-16	Gm15635	7	1	antisense	99661439	99667394	predicted gene 15635 [Source:MGI Symbol;Acc:MGI:3783079]
ENSMUSG00000085118	61.9338	-1.18342	0.179522	-6.59207	4.33727e-11	6.86824e-10	Gm15774	7	-1	antisense	120872692	120875298	predicted gene 15774 [Source:MGI Symbol;Acc:MGI:3783215]
ENSMUSG00000085312	23.673	1.33545	0.400728	3.33257	0.000860481	0.00480569	Gm12763	7	1	lincRNA	33653440	33659268	predicted gene 12763 [Source:MGI Symbol;Acc:MGI:3649978]
ENSMUSG00000085433	37.5643	0.75874	0.177784	4.26776	1.9745e-05	0.00015731	Gm16001	5	-1	antisense	124111109	124112241	predicted gene 16001 [Source:MGI Symbol;Acc:MGI:3802119]
ENSMUSG00000085483	42.8707	-2.4304	0.515972	-4.71034	2.47309e-06	2.29894e-05	Gm14198	2	-1	antisense	154630002	154632636	predicted gene 14198 [Source:MGI Symbol;Acc:MGI:3652051]
ENSMUSG00000085498	14.7732	-0.932316	0.282384	-3.3016	0.000961361	0.00530789	Gm14023	2	1	processed_transcript	129297370	129307826	predicted gene 14023 [Source:MGI Symbol;Acc:MGI:3650639]
ENSMUSG00000085700	33.4065	1.51243	0.299155	5.05569	4.28845e-07	4.40641e-06	Hbb-bh0	7	-1	pseudogene	103850020	103850148	hemoglobin, beta, pseudogene bh0 [Source:MGI Symbol;Acc:MGI:96023]
ENSMUSG00000085772	15.3587	2.21446	0.310251	7.13766	9.4936e-13	1.75688e-11	D630024....	11	-1	lincRNA	31790113	31824524	RIKEN cDNA D630024D03 gene [Source:MGI Symbol;Acc:MGI:3041224]
ENSMUSG00000085913	49.034	-0.631794	0.170452	-3.70659	0.000210071	0.0013585	Gm15601	14	1	antisense	45587740	45598512	predicted gene 15601 [Source:MGI Symbol;Acc:MGI:3783048]
ENSMUSG00000085972	46.8182	0.630159	0.166149	3.79274	0.000148996	0.000993259	1110028....	11	1	sense_intronic	87701396	87705331	RIKEN cDNA 1110028F11 gene [Source:MGI Symbol;Acc:MGI:1915940]
ENSMUSG00000086054	10.7737	0.976003	0.305712	3.19256	0.0014102	0.00746052	Gm13824	5	1	antisense	114968784	114998046	predicted gene 13824 [Source:MGI Symbol;Acc:MGI:3652225]
ENSMUSG00000086335	15.1159	2.02112	0.299738	6.74296	1.55187e-11	2.58265e-10	Gm12107	11	1	lincRNA	31832660	31838214	predicted gene 12107 [Source:MGI Symbol;Acc:MGI:3651177]
ENSMUSG00000086438	48.9149	-1.1312	0.199194	-5.67887	1.35584e-08	1.67641e-07	2510003....	3	-1	antisense	153850373	153852424	RIKEN cDNA 2510003D18 gene [Source:MGI Symbol;Acc:MGI:1919567]
ENSMUSG00000086449	284.752	7.5338	0.325962	23.1126	3.46248e-118	1.73693e-115	9030204....	2	1	antisense	35819190	35823385	RIKEN cDNA 9030204H09 gene [Source:MGI Symbol;Acc:MGI:1924915]
ENSMUSG00000086534	10.9171	1.40987	0.320982	4.39238	1.12115e-05	9.31817e-05	Gm16758	17	1	processed_transcript	29890084	29897067	predicted gene, 16758 [Source:MGI Symbol;Acc:MGI:4439682]
ENSMUSG00000086825	51.9275	-1.05455	0.183501	-5.74683	9.09335e-09	1.13736e-07	Gm15675	1	-1	lincRNA	130429781	130437191	predicted gene 15675 [Source:MGI Symbol;Acc:MGI:3783117]
ENSMUSG00000086885	32.6179	0.893101	0.227275	3.92961	8.50856e-05	0.000599654	Gm13846	6	1	lincRNA	31651041	31662021	predicted gene 13846 [Source:MGI Symbol;Acc:MGI:3651995]
ENSMUSG00000087013	35.7338	-0.922461	0.235794	-3.91215	9.14777e-05	0.000640527	2610027....	11	-1	processed_transcript	85791661	85832223	RIKEN cDNA 2610027K06 gene [Source:MGI Symbol;Acc:MGI:1917159]
ENSMUSG00000087122	15.3825	3.57378	0.382283	9.34852	8.8879e-21	3.09008e-19	4930403....	11	1	antisense	34299707	34308113	RIKEN cDNA 4930403D09 gene [Source:MGI Symbol;Acc:MGI:2441677]
ENSMUSG00000087365	56.1778	0.840531	0.174227	4.82433	1.40473e-06	1.35421e-05	C430049....	X	-1	processed_transcript	53055046	53057190	RIKEN cDNA C430049B03 gene [Source:MGI Symbol;Acc:MGI:1924903]
ENSMUSG00000087442	44.2194	-0.900131	0.19404	-4.63891	3.5026e-06	3.17403e-05	Gm14453	2	-1	antisense	173025685	173034580	predicted gene 14453 [Source:MGI Symbol;Acc:MGI:3702165]
ENSMUSG00000087528	137.812	-0.749117	0.129999	-5.76246	8.28963e-09	1.04054e-07	9830144....	2	-1	processed_transcript	129205958	129230579	RIKEN cDNA 9830144P21 gene [Source:MGI Symbol;Acc:MGI:3041171]
ENSMUSG00000089679	15.388	1.00509	0.276658	3.63295	0.000280194	0.00175854	Gm16299	19	-1	antisense	53819354	53825128	predicted gene 16299 [Source:MGI Symbol;Acc:MGI:3826539]
ENSMUSG00000089766	18.9719	-2.09979	0.576837	-3.64018	0.000272452	0.00171301	Gm16538	19	1	antisense	5727206	5731627	predicted gene 16538 [Source:MGI Symbol;Acc:MGI:4414958]
ENSMUSG00000089829	16.2129	0.923815	0.271513	3.40247	0.000667797	0.00381167	Gm16565	1	1	processed_transcript	165781075	165789367	predicted gene 16565 [Source:MGI Symbol;Acc:MGI:4414985]
ENSMUSG00000090174	10.7444	2.21297	0.38146	5.80131	6.58008e-09	8.33397e-08	Gm10612	8	1	antisense	122697860	122700160	predicted gene 10612 [Source:MGI Symbol;Acc:MGI:3708796]
ENSMUSG00000090249	11.8839	-2.11862	0.588852	-3.59788	0.000320822	0.00197383	Gm3287	14	-1	antisense	44026004	44037526	predicted gene 3287 [Source:MGI Symbol;Acc:MGI:3781465]
ENSMUSG00000090877	65.8937	1.95052	0.340013	5.73659	9.66043e-09	1.20614e-07	Hspa1b	17	-1	protein_coding	34956436	34959238	heat shock protein 1B [Source:MGI Symbol;Acc:MGI:99517]
ENSMUSG00000091694	105.289	-1.50341	0.472129	-3.18432	0.00145097	0.00764739	Apol11b	15	-1	protein_coding	77633951	77643286	apolipoprotein L 11b [Source:MGI Symbol;Acc:MGI:3036248]
ENSMUSG00000091971	24.9771	2.72223	0.360317	7.55508	4.18599e-14	8.82828e-13	Hspa1a	17	-1	protein_coding	34969199	34972154	heat shock protein 1A [Source:MGI Symbol;Acc:MGI:96244]
ENSMUSG00000091985	155.336	3.58678	0.171236	20.9464	2.02462e-97	7.29174e-95	Gm17354	4	-1	lincRNA	108633843	108637441	predicted gene, 17354 [Source:MGI Symbol;Acc:MGI:4936988]
ENSMUSG00000092274	1517.98	1.69482	0.219985	7.70422	1.31641e-14	2.8846e-13	Neat1	19	-1	lincRNA	5824708	5845478	nuclear paraspeckle assembly transcript 1 (non-protein coding) [Source:MGI Symbol;Acc:MGI:1914211]
ENSMUSG00000093104	11.5748	-2.24236	0.353057	-6.35126	2.13552e-10	3.14088e-09	Gm24980	2	-1	miRNA	26014595	26014747	predicted gene, 24980 [Source:MGI Symbol;Acc:MGI:5454757]
ENSMUSG00000093759	40.757	2.30215	0.208626	11.0348	2.59656e-28	1.40274e-26	2600006....	9	1	processed_transcript	64080761	64086961	RIKEN cDNA 2600006L11 gene [Source:MGI Symbol;Acc:MGI:1924064]
ENSMUSG00000095041	616.637	2.04408	0.207666	9.8431	7.34121e-23	2.95457e-21		JH584304.1	-1	protein_coding	52190	59690
ENSMUSG00000095595	343.223	0.824496	0.0698443	11.8048	3.68792e-32	2.33336e-30	Fam177a	12	1	protein_coding	55124528	55142078	family with sequence similarity 177, member A [Source:MGI Symbol;Acc:MGI:1920635]
ENSMUSG00000096221	26.2023	1.34456	0.222422	6.04507	1.49344e-09	2.03462e-08	1500002....	4	-1	protein_coding	155732548	155734627	RIKEN cDNA 1500002C15 gene [Source:MGI Symbol;Acc:MGI:1916196]
ENSMUSG00000096351	598.005	-2.18342	0.36595	-5.96643	2.42495e-09	3.21633e-08	Samd11	4	-1	protein_coding	156246973	156255338	sterile alpha motif domain containing 11 [Source:MGI Symbol;Acc:MGI:2446220]
ENSMUSG00000096472	1086.16	-0.611559	0.075969	-8.05011	8.2717e-16	2.03119e-14	Cdkn2d	9	-1	protein_coding	21288463	21291209	cyclin-dependent kinase inhibitor 2D (p19, inhibits CDK4) [Source:MGI Symbol;Acc:MGI:105387]
ENSMUSG00000096917	51.6408	-1.21945	0.170687	-7.14434	9.04312e-13	1.67925e-11		8	1	lincRNA	57488054	57508877
ENSMUSG00000097013	16.2359	-1.02765	0.315882	-3.25326	0.00114091	0.00618493		10	1	lincRNA	80578647	80580677
ENSMUSG00000097062	66.4418	0.607646	0.13698	4.43602	9.16375e-06	7.73522e-05		11	1	lincRNA	120633768	120635125
ENSMUSG00000097254	22.4433	-0.785709	0.238724	-3.29129	0.000997291	0.00548256		17	-1	lincRNA	83851675	83854393
ENSMUSG00000097289	25.9441	5.08342	0.425405	11.9496	6.52306e-33	4.20289e-31		11	-1	lincRNA	96712982	96747436
ENSMUSG00000097316	95.5151	2.28491	0.200644	11.3879	4.80694e-30	2.7145e-28		1	1	lincRNA	192136898	192151013
ENSMUSG00000097368	81.4503	2.166	0.187837	11.5313	9.17535e-31	5.3255e-29		5	-1	lincRNA	120121103	120139263
ENSMUSG00000097403	12.4876	-1.08004	0.308458	-3.50141	0.000462811	0.00275101		1	-1	lincRNA	136411916	136415519
ENSMUSG00000097589	858.02	-0.634699	0.0812387	-7.81276	5.59473e-15	1.27571e-13	Dleu2	14	-1	lincRNA	61602839	61682373	deleted in lymphocytic leukemia, 2 [Source:MGI Symbol;Acc:MGI:1934030]
ENSMUSG00000097609	22.2495	0.787399	0.243824	3.22937	0.00124062	0.00665612		8	-1	lincRNA	68218173	68228413
ENSMUSG00000097620	22.7714	0.888486	0.232884	3.81514	0.000136107	0.000918233	4921514....	4	1	protein_coding	141115660	141118087	RIKEN cDNA 4921514A10 gene [Source:MGI Symbol;Acc:MGI:3704238]
ENSMUSG00000097848	11.2818	1.11412	0.315064	3.53618	0.000405959	0.00243992		13	1	lincRNA	99100706	99107580
ENSMUSG00000097855	16.1495	1.21637	0.264428	4.59999	4.22504e-06	3.76793e-05		19	-1	lincRNA	29486355	29523159
ENSMUSG00000097893	77.7888	0.593673	0.149095	3.98186	6.83791e-05	0.000494314		1	1	lincRNA	9747648	9791922
ENSMUSG00000097993	56.0058	-0.620363	0.166211	-3.73238	0.000189675	0.0012357	Ptprv	1	-1	processed_transcript	135108497	135132594	protein tyrosine phosphatase, receptor type, V [Source:MGI Symbol;Acc:MGI:108027]
ENSMUSG00000098168	92.0636	2.58444	0.172517	14.9808	9.80241e-51	1.32389e-48		1	1	sense_intronic	34236596	34238820
